# Supplementary material for: Fibroproliferative changes on high-resolution CT in the acute respiratory distress syndrome predict mortality and ventilator dependency: a prospective observational cohort study
Source: PubMed Central journal article supplement — BMJ Open. 2012 Mar 1;2(2):e000545. doi: 10.1136/bmjopen-2011-000545 (PMC3293132; doi:10.1136/bmjopen-2011-000545), 2012-03-01
Supplement: bmjopen-2011-000545.draft_revisions.pdf [file bmjopen-2011-000545.draft_revisions.pdf]

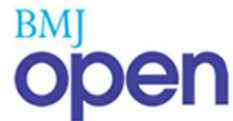

**Fibroproliferative Changes on High-Resolution Computed Tomography in the Acute Respiratory Distress Syndrome Predict Mortality and Ventilator Dependency: A Prospective Observational Cohort Study**

|                                 |                                                                                                                                                                                                                                                                                                                                                                                                                                                                                                                                                                                                                                                                                                                                                                                                                                                                                                                                                                                                                                                                                                                                                                                                                                                                                                                                                                                                                                                                                                                                                                                                                                                                                                                                                                                                                                                                                            |
|---------------------------------|--------------------------------------------------------------------------------------------------------------------------------------------------------------------------------------------------------------------------------------------------------------------------------------------------------------------------------------------------------------------------------------------------------------------------------------------------------------------------------------------------------------------------------------------------------------------------------------------------------------------------------------------------------------------------------------------------------------------------------------------------------------------------------------------------------------------------------------------------------------------------------------------------------------------------------------------------------------------------------------------------------------------------------------------------------------------------------------------------------------------------------------------------------------------------------------------------------------------------------------------------------------------------------------------------------------------------------------------------------------------------------------------------------------------------------------------------------------------------------------------------------------------------------------------------------------------------------------------------------------------------------------------------------------------------------------------------------------------------------------------------------------------------------------------------------------------------------------------------------------------------------------------|
| Journal:                        | <i>BMJ Open</i>                                                                                                                                                                                                                                                                                                                                                                                                                                                                                                                                                                                                                                                                                                                                                                                                                                                                                                                                                                                                                                                                                                                                                                                                                                                                                                                                                                                                                                                                                                                                                                                                                                                                                                                                                                                                                                                                            |
| Manuscript ID:                  | bmjopen-2011-000545                                                                                                                                                                                                                                                                                                                                                                                                                                                                                                                                                                                                                                                                                                                                                                                                                                                                                                                                                                                                                                                                                                                                                                                                                                                                                                                                                                                                                                                                                                                                                                                                                                                                                                                                                                                                                                                                        |
| Article Type:                   | Research                                                                                                                                                                                                                                                                                                                                                                                                                                                                                                                                                                                                                                                                                                                                                                                                                                                                                                                                                                                                                                                                                                                                                                                                                                                                                                                                                                                                                                                                                                                                                                                                                                                                                                                                                                                                                                                                                   |
| Date Submitted by the Author:   | 01-Nov-2011                                                                                                                                                                                                                                                                                                                                                                                                                                                                                                                                                                                                                                                                                                                                                                                                                                                                                                                                                                                                                                                                                                                                                                                                                                                                                                                                                                                                                                                                                                                                                                                                                                                                                                                                                                                                                                                                                |
| Complete List of Authors:       | <p>Ichikado, Kazuya; Saiseikai Kumamoto Hospital, Division of Respiratory Medicine<br/> Muranaka, Hiroyuki; Saiseikai Kumamoto Hospital, Division of Respiratory Medicine<br/> Gushima, Yasuhiro; Saiseikai Kumamoto Hospital, Division of Respiratory Medicine<br/> Kotani, Toru; Tokyo Women's Medical University, Department of Anesthesiology and Intensive Care<br/> Nader, Habashi; R Adams Cowley Shock Trauma Center, Multi-trauma Intensive Care Unit<br/> Fujimoto, Kiminori; Kurume University School of Medicine, Department of Radiology; Kurume University Hospital, Center for Diagnostic Imaging<br/> Johkoh, Takeshi; Kinki Central Hospital of Mutual Aid Association of Public Teachers, Department of Radiology<br/> Iwamoto, Norihiro; Saiseikai Kumamoto Hospital, Division of Respiratory Medicine<br/> Kawamura, Kodai; Saiseikai Kumamoto Hospital, Division of Respiratory Medicine<br/> Nagano, Junji; Kumamoto City Hospital, Pulmonary Division<br/> Fukuda, Kohichiro; Kumamoto City Hospital, Pulmonary Division<br/> Hirata, Naomi; Kumamoto Chu-oh Hospital, Pulmonary Division<br/> Yoshinaga, Takeshi; Kumamoto Chu-oh Hospital, Pulmonary Division<br/> Ichiyasu, Hidenori; Kumamoto University Graduate School of Medical Sciences, Department of Respiratory Medicine<br/> Tsumura, Shinsuke; Kumamoto University Graduate School of Medical Sciences, Department of Respiratory Medicine<br/> Kohrogi, Hirotsugu; Kumamoto University Graduate School of Medical Sciences, Department of Respiratory Medicine<br/> Kawaguchi, Atsushi; Biostatistics Center, Kurume University School of Medicine<br/> Yoshioka, Masakazu; Saiseikai Kumamoto Hospital, Division of Respiratory Medicine<br/> Sakuma, Tsutomu; Kanazawa Medical University, Thoracic Surgery<br/> Suga, Moritaka; Saiseikai Kumamoto Hospital, Division of Respiratory Medicine</p> |
| <b>Primary Subject Heading</b>: | Respiratory medicine                                                                                                                                                                                                                                                                                                                                                                                                                                                                                                                                                                                                                                                                                                                                                                                                                                                                                                                                                                                                                                                                                                                                                                                                                                                                                                                                                                                                                                                                                                                                                                                                                                                                                                                                                                                                                                                                       |

1  
2  
3  
4  
5  
6  
7  
8  
9  
10  
11  
12  
13  
14  
15  
16  
17  
18  
19  
20  
21  
22  
23  
24  
25  
26  
27  
28  
29  
30  
31  
32  
33  
34  
35  
36  
37  
38  
39  
40  
41  
42  
43  
44  
45  
46  
47  
48  
49  
50  
51  
52  
53  
54  
55  
56  
57  
58  
59  
60

|                            |                                                                                                                            |
|----------------------------|----------------------------------------------------------------------------------------------------------------------------|
| Secondary Subject Heading: | Intensive care, Radiology and imaging                                                                                      |
| Keywords:                  | Adult intensive & critical care < ANAESTHETICS, Thoracic medicine < INTERNAL MEDICINE, Chest imaging < RADIOLOGY & IMAGING |
|                            |                                                                                                                            |

SCHOLARONE™  
Manuscripts

For peer review only

1  
2  
3  
4  
5  
6 Fibroproliferative Changes on High-Resolution Computed  
7  
8 Tomography in the Acute Respiratory Distress Syndrome  
9  
10  
11 Predict Mortality and Ventilator Dependency: A Prospective  
12  
13  
14 Observational Cohort Study  
15  
16  
17  
18  
19

20 Kazuya Ichikado, MD, PhD<sup>1</sup>, Hiroyuki Muranaka, MD, PhD<sup>1</sup>,  
21 Yasuhiro Gushima, MD, PhD<sup>1</sup>, Toru Kotani, MD<sup>2</sup>, Habashi M. Nader, MD<sup>3</sup>,  
22 Kiminori Fujimoto, MD, PhD<sup>4</sup>, Takeshi Johkoh, MD, PhD<sup>5</sup>,  
23 Norihiro Iwamoto, MD, PhD<sup>1</sup>, Kodai Kawamura, MD, PhD<sup>1</sup>,  
24 , Junji Nagano, MD, PhD<sup>6</sup>, Kohichiro Fukuda, MD, PhD<sup>6</sup>, Naomi Hirata, MD, PhD<sup>7</sup>,  
25 Takeshi Yoshinaga, MD, PhD<sup>7</sup>, Hidenori Ichiyasu, MD, PhD<sup>8</sup>, Shinsuke Tsumura, MD<sup>8</sup>,  
26 Hirotsugu Kohrogi, MD, PhD<sup>8</sup>, Atsushi Kawaguchi, PhD<sup>9</sup>, Masakazu Yoshioka, MD<sup>1</sup>,  
27 Tsutomu Sakuma, MD, PhD<sup>10</sup>, Moritaka Suga, MD, PhD<sup>1</sup>  
28  
29

30  
31 <sup>1</sup> Division of Respiratory Medicine, Saiseikai Kumamoto Hospital, 5-3-1 Chikami, Kumamoto 861-4193,  
32 Japan, <sup>2</sup> Associate professor, Department of Anesthesiology and Intensive Care Tokyo Women's Medical  
33 University, Tokyo 162-8666, Japan, <sup>3</sup> Associate professor, Multi-trauma Intensive Care Unit, R Adams  
34 Cowley Shock Trauma Center, 22S, Greene Street, Baltimore, Maryland, USA, <sup>4</sup> Associate professor,  
35 Department of Radiology, Kurume University School of Medicine and Center for Diagnostic Imaging,  
36 Kurume University Hospital, 67 Asahi-machi, Kurume, Fukuoka 830-0011, Japan, <sup>5</sup> Director, Department  
37 of Radiology, Kinki Central Hospital of Mutual Aid Association of Public Teachers, Hyogo 664-0872,  
38 Japan, <sup>6</sup> Pulmonary Division, Kumamoto City Hospital, Kumamoto 862-09, Japan, <sup>7</sup> Pulmonary Division,  
39 Kumamoto Chu-oh Hospital, Tainoshima, Kumamoto 862-0965, Japan, <sup>8</sup> Department of Respiratory  
40 Medicine, Kumamoto University Graduate School of Medical Sciences, 1-1-1 Honjo, Kumamoto City  
41 860-8556, Japan, <sup>9</sup> Biostatistics Center, Kurume University School of Medicine, Kurume, Fukuoka  
42 830-0011, Japan, <sup>10</sup> Professor of Thoracic Surgery, Kanazawa Medical University, Uchinada, Ishikawa  
43 920-0293, Japan  
44  
45  
46

47 Correspondence to: K. Ichikado, MD, PhD. Chief Chest Physician, E-mail to  
48 [ichikado-k-991017@lib.bbiq.jp](mailto:ichikado-k-991017@lib.bbiq.jp) or [kazuya-ichikado@saiseikaikumamoto.jp](mailto:kazuya-ichikado@saiseikaikumamoto.jp)  
49  
50  
51  
52  
53  
54  
55  
56  
57  
58  
59  
60

1  
2  
3  
4  
5  
6 **Conflict of interest disclosures:** None of the authors has declared any conflict of interest  
7  
8 related to this work.  
9

10  
11  
12  
13 **Keywords**

14  
15 acute respiratory distress syndrome, high-resolution computed tomography,  
16  
17 ventilator-associated lung injury, corticosteroids  
18  
19  
20  
21  
22  
23  
24  
25  
26  
27  
28  
29  
30  
31  
32  
33  
34  
35  
36  
37  
38  
39  
40  
41  
42  
43  
44  
45  
46  
47  
48  
49  
50  
51  
52  
53  
54  
55  
56  
57  
58  
59  
60

### 1) Article Focus

- Whether the extent of fibroproliferation on high-resolution CT (HRCT) scan at the time diagnosis of ARDS would impact 60-day and 180-day mortality?
- Whether the extent of fibroproliferation on HRCT scan at the time diagnosis of ARDS would impact ventilator dependency and its associated outcomes?
- Whether the extent of fibroproliferation on HRCT scan at the time diagnosis of ARDS would impact multiple-organ failure?

### 2) Key Messages

- Pulmonary fibroproliferation assessed by HRCT in patients with early ARDS predicts increased mortality.
- Pulmonary fibroproliferation assessed by HRCT in patients with early ARDS predicts ventilator dependency and its associated outcomes (barotraumas, ventilator-associated pneumonia).
- Pulmonary fibroproliferation assessed by HRCT in patients with early ARDS increases susceptibility to multiple organ failure.

### 3) Strengths and Limitations

- The CT score is based on our previous published studies correlating HRCT findings with pathology and has been evaluated in the other diseases.
- a relatively small number of patients from a single institution
- lack of correlation with either clinical parameters or pathologic findings

1  
2  
3  
4  
5  
6 **Objectives:** To examine whether the extent of fibroproliferative changes on

7  
8 high-resolution computed tomography (HRCT) scan influences prognosis, ventilator

9  
10 dependency, and the associated outcomes in patients with early acute respiratory

11  
12 distress syndrome (ARDS).

13  
14  
15 **Design:** A prospective observational cohort study

16  
17  
18 **Setting:** Intensive care unit in an educational hospital

19  
20  
21 **Participants:** Eighty-five patients with ARDS who met American-European Consensus

22  
23  
24 Conference Criteria and eligible criteria.

25  
26  
27 **Interventions:** HRCT scans were performed and prospectively evaluated by two

28  
29 independent observers on the day of diagnosis and graded into six findings according to

30  
31 the extent of fibroproliferation. An overall HRCT score was obtained by previously

32  
33 published method.

34  
35  
36  
37 **Primary and secondary outcomes:** The primary outcomes were 60-day and 180-day

38  
39 mortality. Secondary outcomes included the number of ventilator-free days, organ

40  
41 failure-free days, the incidence of barotraumas, and the occurrence of

42  
43 ventilator-associated pneumonia.

44  
45  
46  
47 **Results:** Higher HRCT scores were associated with significantly decreased number of

48  
49 organ-failure free days as well as with decreased number of ventilator-free days.

50  
51  
52 Multivariate Cox proportional hazards model showed that the HRCT score remained an

53  
54 independent risk factor for mortality (hazard ratio 1.20; 95% confidence interval 1.06,

1  
2  
3  
4  
5  
6 1.36;  $p = 0.005$ ). Multivariate analysis also revealed that the CT score had predictive  
7  
8 value for ventilator-weaning within 28 days (odds ratio 0.63; 95% CI 0.48, 0.82;  $p =$   
9  
10 0.0006) as well as for an incidence of barotraumas (1.61; 95%CI 1.08, 2.38;  $p = 0.018$ )  
11  
12 and for an occurrence of ventilator-associated pneumonia (1.46; 95%CI 1.13,1.89;  $p =$   
13  
14 0.004). An HRCT score  $< 210$  enabled prediction of 180 day survival with 71 %  
15  
16 sensitivity and 76 % specificity and of ventilator-weaning failure within 28 days with  
17  
18 75 % sensitivity and 76 % specificity.  
19  
20  
21  
22  
23

24 **Conclusions:** Pulmonary fibroproliferation assessed by HRCT in patients with early  
25  
26 ARDS predicts increased mortality with an increased susceptibility to multiple organ  
27  
28 failure, including ventilator dependency and its associated outcomes.  
29  
30  
31  
32  
33  
34

#### 35 **Data sharing statement**

36  
37 There is no additional data available.  
38  
39

#### 40 **Research grant**

41  
42 This research received no specific grant from any funding agency in the public,  
43  
44 commercial or not-for-profit sectors.  
45  
46  
47  
48  
49  
50  
51  
52  
53  
54  
55  
56  
57  
58  
59  
60

**Abbreviation list**

ARDS: acute respiratory distress syndrome

HRCT: high-resolution computed tomography

DAD: diffuse alveolar damage

APACHE II: Acute Physiology and Chronic Health Evaluation II score

SOFA score: Sequential Organ Failure Assessment score

MOF: multi-organ failure

DIC: disseminated intravascular coagulation

MDCT: multidetector-row computed tomography

PEEP: positive end-expiratory pressure

VAP: ventilator associated pneumonia

ROC: receiver-operator characteristic

AUC: area under the curve

CI: confidence interval

SD: standard deviation



## INTRODUCTION

The acute respiratory distress syndrome (ARDS) is the most severe form of a wide spectrum of pathological conditions designated as acute lung injury<sup>1,2</sup>. ARDS is considered to have an early and a late phase and is pathologically divided into three stages<sup>3</sup> in which an initial inflammatory injury with protein-rich edema and hemorrhage is followed by fibroproliferation, during which fibroblasts proliferate with organization and subsequent collagen deposition, resulting in lung remodeling, ultimately leading to fibrotic lung disease. The histological features of ARDS represent a poorly defined time-dependent stereotypic response to acute lung injury and are pathologically designated as diffuse alveolar damage<sup>3,4</sup>. Although pathologic staging may be conceptually useful, commonly used clinical indicators such as PaO<sub>2</sub>/FiO<sub>2</sub> ratio do not correlate well with lung pathology. Although clinicians can use pathophysiology (shunt vs. V/Q mismatch with increasing deadspace) to distinguish the transition from exudative to fibroproliferative ARDS, few features, except probably time, allow them to distinguish these pathological phases without a lung biopsy<sup>5,6</sup>.

Data regarding the significance of a fibroproliferative response on mortality risk assessed using bronchoalveolar lavage or tracheal aspirate in ARDS patients is available<sup>7-10</sup>. High-resolution computed tomographic (HRCT) findings correlate with the pathologic phases of diffuse alveolar damage<sup>12-15</sup>. Furthermore, we have previously reported on the prognostic value of HRCT in determining the extent of

1  
2  
3  
4  
5  
6 fibroproliferation in ARDS patients<sup>15</sup>. Based on HRCT appearance, less  
7  
8 fibroproliferation in early ARDS was associated with greater ventilator-free days and  
9  
10 less barotraumas<sup>15</sup>. In this prospective study, we evaluated not only what was found in  
11  
12 the retrospective study<sup>15</sup> but also the relationship between early fibroproliferation and  
13  
14 the progression to multiple organ failure; whether the extent of fibroproliferation on  
15  
16 HRCT scan at the time diagnosis of ARDS would impact the susceptibility for ventilator  
17  
18 dependency and its associated complications and on the response to treatment.  
19  
20  
21  
22  
23

## 24 **METHODS**

25  
26  
27 One hundred and fifty two patients with ARDS diagnosed according to the  
28  
29 American-European Consensus Conference Criteria<sup>16</sup> were enrolled from October 1,  
30  
31 2004 to July 31, 2008 at our institution. This study was approved by an institutional  
32  
33 review board of our hospital, and informed consent was obtained from the participants  
34  
35 or their families. On the basis of the survival in our retrospective study of 44 patients<sup>15</sup>,  
36  
37 we designated the number of patients more than 80 at least.  
38  
39  
40  
41  
42

## 43 **Patients**

44  
45 Eligible patients were receiving mechanical ventilation by tracheal tube (n = 79)  
46  
47 or mask for non-invasive positive pressure ventilation (n = 6). Furthermore, HRCT scan  
48  
49 was performed on the day of diagnosis of ARDS by their consent. Exclusion criteria  
50  
51 were shown in Figure. 1. Especially, preexisting chronic interstitial lung diseases were  
52  
53 strictly excluded by history taking, imaging data available before onset of ARDS, and  
54  
55  
56  
57  
58  
59  
60

1  
2  
3  
4  
5  
6 the presence of coarse reticulation and honeycombing on HRCT scans suggesting of  
7  
8 chronic pulmonary fibrosis. Furthermore, the other preexisting pulmonary disease such  
9  
10 as pulmonary emphysema was documented from review of radiological reports.  
11  
12

13  
14 Information about our patients' severity and characteristics is reported in Table 1.  
15

### 16 **HRCT examination, assessment, and scoring**

17

18  
19 All patients underwent helical HRCT scanning of the chest on the day of diagnosis of  
20  
21 ARDS using multidetector-row CT (MDCT) scan. All MDCT scans were obtained with  
22  
23 2-mm thickness and 15-mm table speed per rotation and were performed at full  
24  
25 inspiration from the lung apex to base. Contiguous CT slices were reconstructed using  
26  
27 of a high-spatial frequency algorithm. Sections were displayed at 10-mm intervals  
28  
29 throughout the chest with the patient in the supine position and without intravenous  
30  
31 contrast medium. The process did not negatively affect the patients' condition. In this  
32  
33 study, we evaluated single CT scan acquired at day one of the ARDS diagnosis, because  
34  
35 sequential CT scans were hard to be performed after high positive end-expiratory  
36  
37 pressure ventilation was introduced. HRCT scans were evaluated on the day of ARDS  
38  
39 diagnosis by two independent observers who were unaware of patient condition. The  
40  
41 presence and extent of areas of ground-glass attenuation, air-space consolidation,  
42  
43 traction bronchiectasis, traction bronchiolectasis, and honeycombing were assessed.  
44  
45  
46  
47  
48  
49  
50  
51 Ground-glass attenuation was defined as a hazy area with increased opacification  
52  
53 without obscuration of underlying vascular markings. Air-space consolidation was  
54  
55  
56  
57  
58  
59  
60

1  
2  
3  
4  
5  
6 considered present when the vascular markings were obscured. When bronchi were  
7  
8 irregular in contour, the dilated bronchus within areas of parenchymal abnormality was  
9  
10 recognized as traction bronchiectasis. Traction bronchiolectasis was identified by the  
11  
12 presence of dilated bronchioles within areas with parenchymal abnormality.  
13  
14  
15 Honeycombing was defined as the presence of cystic airspaces measuring 2-10 mm in  
16  
17 diameter with well-defined walls.  
18  
19

20  
21  
22 HRCT findings were graded on a scale of 1-6 based on the classification  
23  
24 system correlating with previously described pathology (Fig. 2)<sup>13,15</sup>: 1, normal  
25  
26 attenuation; 2, ground-glass attenuation; 3, consolidation; 4, ground-glass attenuation  
27  
28 with traction bronchiolectasis or bronchiectasis; 5, consolidation with traction  
29  
30 bronchiolectasis or bronchiectasis; 6, honeycombing. The presence of each of these six  
31  
32 abnormalities was assessed independently in three (upper, middle, lower) zones of each  
33  
34 lung. The upper zone was defined as the area above the level of the carina, the middle  
35  
36 zone as the area between the level of the carina and that of the infrapulmonary vein, and  
37  
38 the lower zone as the area below the level of the infrapulmonary vein. The extent of  
39  
40 each abnormality was determined by visually estimating the percentage (to the nearest  
41  
42 10%) of the affected lung parenchyma in each zone. The assessments of the two  
43  
44 observers were averaged. The abnormality score for each zone was calculated by  
45  
46 multiplying the percentage area by the point value (1-6). The six zone scores were  
47  
48 averaged to determine the total score for each abnormality in each patient. The overall  
49  
50  
51  
52  
53  
54  
55  
56  
57  
58  
59  
60

1  
2  
3  
4  
5  
6 CT score for each patient was obtained by adding the six averaged scores. The scoring  
7  
8 system is previously reported<sup>13,15</sup> and has been evaluated in the other diseases<sup>17,18</sup>.

### 11 **Treatment Protocol**

12  
13  
14 All patients underwent a common intensive treatment according to the  
15  
16 domestic clinical practical guidelines<sup>19-23</sup>. Antibiotic therapy was performed by these  
17  
18 guidelines, which were referenced to the American Thoracic Society/Infectious  
19  
20 Diseases Society of America Consensus Guidelines on the Management<sup>24,25</sup>.

21  
22  
23  
24 Although the efficacy of steroids in ARDS patients has been controversial<sup>26-28</sup>,  
25  
26 when this study protocol was made, the efficacy of corticosteroids to the  
27  
28 fibroproliferative ARDS had been reported in a small randomized control study<sup>29</sup>. In the  
29  
30 current study, we examined the relationship between the efficacy of steroids and the  
31  
32 extent of fibroproliferation on HRCT scans. Ventilator management and ventilator  
33  
34 weaning was introduced by the evidence-based guidelines<sup>22, 23</sup> with reference to the  
35  
36 lower tidal volume ( $V_T$ ) strategy (6 ml/kg predicted body weight (PBW)  $< V_T < 10$   
37  
38 ml/kg PBW) in the ARDS Clinical Trial<sup>30</sup> and to the guidelines for weaning and  
39  
40 discontinuing ventilatory support from the American College of Chest Physicians<sup>31</sup>.

### 48 **Screening of ventilator associated outcomes**

49  
50  
51 For each patient, we recorded the number of ventilator-free days. Barotrauma,  
52  
53 defined as any new pneumothorax, pneumomediastinum, or subcutaneous emphysema,  
54  
55 was noted as present or absent on routine chest radiographs or chest tube insertions for  
56  
57  
58  
59  
60

1  
2  
3  
4  
5  
6 known or suspected spontaneous pneumothorax during the first 28 days<sup>32</sup>.  
7

8  
9 Ventilator associated pneumonia (VAP) surveillance was incorporated into the  
10  
11 routine examinations of cultures of sputum obtained using a sterile intratracheal suction  
12  
13 tube<sup>33</sup>. VAP was defined as pneumonia occurring after more than 48 hours of  
14  
15 mechanical ventilation and for up to 72 hours after weaning.  
16  
17

### 18 19 **Organ or system failure**

20  
21 Patients were monitored daily for 28 days for signs of the failure of  
22  
23 extrapulmonary organs and systems according to the ARDS Clinical Trial<sup>30</sup>. The  
24  
25 number of days without organ or system failure was calculated by subtracting the  
26  
27 number of days with organ failure from the lesser of 28 days or the number of days to  
28  
29 number of days with organ failure from the lesser of 28 days or the number of days to  
30  
31 death. The Sequential Organ Failure Assessment (SOFA) score was sequentially  
32  
33 monitored at Day 7 and 14, except for patients who died within 7 days or 14 days.  
34  
35  
36

### 37 38 **Outcome measurements**

39  
40 The primary outcome was mortality 60 days and 180 days after ARDS diagnosis.  
41  
42 Patients discharged from the hospital while alive without assistance for 60 days and 180  
43  
44 days were defined as survivors. Non-survivors were defined as patients who died in the  
45  
46 hospital. Secondary outcome variables included the number of ventilator-free days,  
47  
48 organ failure-free days, the incidence of barotraumas, and the occurrence of  
49  
50 ventilator-associated pneumonia.  
51  
52  
53  
54

### 55 56 **Statistical analysis**

1  
2  
3  
4  
5  
6 Cox proportional hazards regression analysis was used to examine the influence on  
7  
8 survival of 10 % change of radiologically fibroproliferation on HRCT while adjusting  
9  
10 for other prognostic clinical factors such as age, severity of illness, non-pulmonary  
11  
12 organ dysfunctions, that had been reported<sup>34-36</sup>. Multivariate regression analysis was  
13  
14 also performed to assess the impact on ventilator-weaning failure within 28 days, an  
15  
16 incidence of barotraumas, and ventilator-associated pneumonia. To analyze the CT  
17  
18 score as a predictor of survival, or of the failure of ventilator weaning or of the  
19  
20 occurrence of barotrauma within 28 days after the onset of ARDS, we used  
21  
22 receiver-operator characteristic (ROC) curves and the corresponding area under the  
23  
24 curve (AUC) to evaluate how the prediction model performed on the test data and to  
25  
26 determine the cutoff value of the CT score yielding the highest sensitivity and  
27  
28 specificity which were determined by the Youden index (i.e., sensitivity + specificity –  
29  
30 1). Statistical analyses were performed by using the SPSS package (version 18.0J; SPSS,  
31  
32 Tokyo, Japan). For all statistical analyses,  $p < 0.05$  was considered significant.  
33  
34  
35  
36  
37  
38  
39  
40  
41  
42  
43  
44  
45  
46  
47  
48  
49  
50  
51  
52  
53  
54  
55  
56  
57  
58  
59  
60

## RESULTS

### Baseline clinical characteristics

Non-survivors had more severe lung injury with fibroproliferative changes on HRCT scan as shown by their higher HRCT scores than survivors, although non-survivors tended to have less severe multiorgan failure as expressed by their smaller SOFA scores. No significant differences were seen between survivors and non-survivors in the number of a history of cigarette smoking and a presence of emphysema. No significant differences were also observed in the therapeutic variables as well (Table 1).

### HRCT findings for survivors and non-survivors

The area of increased attenuation associated with traction bronchiolectasis or bronchiectasis, indicative of radiologically fibroproliferation, was observed in 40 (47%) of 85 patients at presentation and was significantly smaller in survivors than in non-survivors (Table 2), whereas the area of increased attenuation without traction bronchiolectasis or bronchiectasis was greater in survivors than in non-survivors. Interobserver variability in evaluation of the presence of lung abnormalities was good (kappa, 0.63-0.83), and the assessments of the extent of abnormality by two different observers also correlated well (Spearman rank correlation coefficient, 0.72;  $p < 0.01$ ).

### Prognostic value of the HRCT score

The overall HRCT score of survivors (median  $\pm$  SD, 195.7  $\pm$  53.7; range,



1  
2  
3  
4  
5  
6 133.4-325.0) was significantly smaller than that of non-survivors ( $233.1 \pm 46.2$ ;  
7  
8  
9 174.8-384.8). Construction of a ROC curve yielded an optimal cut-off value of the  
10  
11 HRCT score of 210 which was determined for prediction of survival at Day 60 with  
12  
13 71 % sensitivity of and 72 % specificity (AUC, 0.71; 95% confidence interval (CI),  
14  
15 0.61-0.82) and for prediction of survival at Day 180 with 71 % sensitivity and 76 %  
16  
17 specificity (AUC, 0.73; 95% CI, 0.62-0.84) (Fig. 3). A significant difference was  
18  
19 observed in the 60-day mortality rate between patients with CT score < 210 and those  
20  
21 with CT score  $\geq$  210 ( $p < 0.0001$ ) as well as in the ventilator-free days at day 28 ( $p <$   
22  
23 0.0001) (Table 3). The difference in the 60-day mortality rate between patients with  
24  
25 more or less fibroproliferative changes on HRCT scan persisted regardless of causes of  
26  
27 ARDS (Fig. 4). Multivariate Cox proportional hazards model with adjustment for  
28  
29 demographic characteristics, severity of illness, non-pulmonary organ dysfunctions, and  
30  
31 HRCT score at diagnosis, the HRCT score remained an independent risk factor for  
32  
33 mortality (hazard ratio 1.20; 95% confidence interval 1.06, 1.36;  $p = 0.005$ ) when  
34  
35 expressed as mortality change per 10% increase in the area of attenuation with traction  
36  
37 bronchiolectasis or bronchiectasis on HRCT scans (Table 4).  
38  
39

40  
41  
42  
43  
44  
45  
46  
47  
48 **Relation between the HRCT score and the number of ventilator-free days, and the**  
49  
50 **number of organ-failure-free days and sequential changes of SOFA score**  
51

52  
53 An ROC curve determined the best cut-off value of the CT score of 210 for  
54  
55 prediction of ventilator-weaning failure within 28 days with 75 % sensitivity and 76 %  
56  
57  
58  
59  
60

1  
2  
3  
4  
5  
6 specificity (AUC, 0.77; 95% CI, 0.67-0.88) (Fig. 5a). Regardless of significantly higher  
7  
8 SOFA score ( $8.0 \pm 3.0$  versus  $5.0 \pm 2.0$ ;  $p < 0.0001$ ) and higher DIC score ( $2.8 \pm 1.5$   
9  
10 versus  $1.9 \pm 1.8$ ;  $p < 0.002$ ) at diagnosis, patients with a CT score of  $< 210$  had a  
11  
12 significantly higher number of ventilator-free days ( $14.0 \pm 7.8$  versus  $5.2 \pm 8.0$  days;  $p <$   
13  
14  $0.0001$ ). Those patients with a lower CT score were associated with less severe  
15  
16 subsequent multiorgan failure as shown by a significantly higher number of  
17  
18 organ-failure-free days (Table 3) and by significant decrease of sequential SOFA score  
19  
20 than that of patients with a higher CT score (Fig.7). Multivariate regression analysis,  
21  
22 with adjustment for demographic characteristics, general severity, and occurrence of  
23  
24 barotraumas, showed that the CT score was independently associated with  
25  
26 ventilator-weaning within 28 days with an odds ratio of 0.63 when expressed as  
27  
28 weaning failure change per 10% increase in the area of attenuation with traction  
29  
30 bronchiolectasis or bronchiectasis on HRCT scans ( $p = 0.0006$ ) (Table 5a).  
31  
32  
33  
34  
35  
36  
37  
38  
39

#### 40 **Relation between the HRCT score and the incidence of barotraumas or** 41 42 **ventilator-associated pneumonia** 43 44

45 All eleven patients with barotrauma had pneumothorax. Barotrauma occurred  
46  
47 3-28 days (mean  $\pm$  SD,  $12.7 \pm 9.4$  days) after ARDS onset. An ROC curve identified the  
48  
49 optimal cutoff value of the CT score of 235 for prediction of barotrauma onset with  
50  
51 73 % sensitivity and 77 % specificity (AUC, 0.77; 95% CI, 0.59-0.95) (Fig. 6a).  
52  
53  
54  
55  
56 Patients with the CT score  $< 235$  had a significantly lower incidence of barotrauma (5.0  
57  
58  
59  
60

1  
2  
3  
4  
5  
6 versus 32.0 %;  $p = 0.0019$ ) within 28 days after the onset of ARDS than those with CT  
7  
8 score of  $\geq 235$  (Fig. 5b). The CT score was also independently associated with the  
9  
10 occurrence of barotraumas with an odds ratio of 1.61 by multivariate regression analysis  
11  
12 ( $p = 0.018$ ) (Table 6b). Ventilator-associated pneumonia (VAP) was documented in 36  
13  
14 patients (42.3%) after day 5 since ARDS onset. The percentage of patients complicated  
15  
16 with VAP in the higher CT score group tended to be higher than those in the lower CT  
17  
18 score groups (51.4 and 35.4 percent, respectively;  $p = 0.14$ ). Multivariate analysis also  
19  
20 demonstrated that the CT score was independently associated with the complication of  
21  
22 VAP with an odds ratio of 1.46 ( $p = 0.0041$ ) (Table 5c).  
23  
24  
25  
26  
27  
28  
29  
30  
31  
32  
33  
34  
35  
36  
37  
38  
39  
40  
41  
42  
43  
44  
45  
46  
47  
48  
49  
50  
51  
52  
53  
54  
55  
56  
57  
58  
59  
60

## DISCUSSION

Regardless of the cause of ARDS, we found the extent of fibroproliferative changes on HRCT at diagnosis of ARDS was an independent predictive factor for survival and ventilator dependency. Furthermore, patients with extensive fibroproliferative changes on HRCT scan were more susceptible to associated multiorgan failure, barotraumas and ventilator-associated pneumonia than those with less extensive changes.

Semi-quantitative determination of fibroproliferation by means of HRCT assessment was informative with regard to the potential not only for response to treatment but also for susceptibility to subsequent ventilator-associated outcomes (ventilator dependency, barotraumas, and ventilator-associated pneumonia).

Biochemical evidence of fibroproliferation is present early in the acute lung injury process. N-terminal procollagen peptide III (N-PCP-III) is a marker of collagen turnover and is elevated in bronchoalveolar lavage (BAL) fluid and tracheal aspirate from ARDS patients within 24 h of diagnosis<sup>7-10</sup>. The increased N-PCP-III concentration in BALF at diagnosis was associated with poor prognosis, suggesting that pulmonary early fibroproliferation is an important determinant of outcome<sup>7-10</sup>. In the present study, traction bronchiectasis within areas of increased attenuation, suggesting radiologically fibroproliferation, was already detectable on HRCT scans obtained on the day of ARDS onset in 40 patients (47%). These results supported the previous reports and suggested that a clinically early time point does

1  
2  
3  
4  
5  
6 not necessarily correspond to a pathologically early phase of ARDS. Given that no  
7  
8  
9 significant difference in the cause of ARDS was apparent between the survivors and  
10  
11 non-survivors in this study, no correlation between the HRCT score and the clinical  
12  
13 duration of ARDS may also be attributable to differences in individual sensitivity to  
14  
15 lung injury and in the intensity of the consequent exaggerated inflammation that  
16  
17 occurs between the onset of injury and progression to ARDS. The term  
18  
19  
20  
21 “fibroproliferative” ARDS may not necessarily apply only to “late phase” ARDS but  
22  
23 possibly also to “early phase”. Accordingly, extent of fibroproliferative changes on  
24  
25 HRCT scan, together with N-PCP-III concentration in BALF, may be a potential  
26  
27  
28  
29  
30 clue to differentiate “real” late ARDS from the early one.  
31

32  
33  
34  
35  
36  
37  
38  
39  
40  
41  
42  
43  
44  
45  
46  
47  
48  
49  
50  
51  
52  
53  
54  
55  
56  
57  
58  
59  
60

Currently, there have been few prospective clinical studies to validate the susceptibility to ventilator-associated outcomes. The ARDS Network low tidal volume study has suggested that excessive large tidal ventilation induces inflammatory cytokines and is associated with a known risk factor for ventilator associated lung injury<sup>27</sup>. In the present study, patients with extensive fibroproliferation shown as higher HRCT score on the day of ARDS onset needed a longer duration of mechanical ventilation with subsequent ventilator-associated pneumonia and had shorter organ-failure free days, and subsequently suffered from multiple organ failure.

Barotraumas occurring in critically ill patients independently affects intensive care

1  
2  
3  
4  
5  
6 unit mortality<sup>37</sup>. Barotrauma events occur late in the course of ARDS and are related to  
7  
8 lung structural changes such as cystic or fibroproliferative lesions that develop over  
9  
10 time<sup>38</sup>. In our study, barotrauma occurred more than 10 days (mean  $\pm$  SD, 12.7  $\pm$  9.4  
11  
12 days) after the onset of ARDS and was more frequent in patients with a higher HRCT  
13  
14 score (score  $\geq$  235) than in those with a lower HRCT score (score  $<$  235) during the first  
15  
16 28 days. Given that a higher HRCT score at diagnosis suggests advanced  
17  
18 fibroproliferation, our data support the relationship between pulmonary  
19  
20 fibroproliferation and its susceptibility to barotraumas.  
21  
22  
23  
24  
25

26  
27 Ventilator-associated pneumonia (VAP) has been a causative factor of subsequent  
28  
29 systemic inflammatory syndrome resulting in multi-organ failure<sup>32</sup>. The risk of VAP  
30  
31 increases with prolonged mechanical ventilation<sup>33</sup>. More extensive fibroproliferative  
32  
33 changes on HRCT scan shown as a higher CT score were associated with a longer  
34  
35 ventilator dependency that was more susceptible to VAP onset. These results support  
36  
37 that pulmonary fibroproliferation of ARDS increases risk for ventilator dependency and  
38  
39 its associated complications.  
40  
41  
42  
43  
44

45  
46 In a previous study of 45 cases of ARDS confirmed at biopsy, patients whose  
47  
48 conditions were shown histologically to be in the acute exudative phase had a better  
49  
50 prognosis than did those whose condition was shown to be in the fibroproliferative  
51  
52 phases<sup>39</sup>. In our study, the group of patients who had less fibroproliferative changes on  
53  
54 HRCT scans (HRCT score,  $<$  210) showed lower mortality and more ventilator-free  
55  
56  
57  
58  
59  
60

1  
2  
3  
4  
5  
6 days than those who had more extensive areas of fibroproliferation (HRCT score,  $\geq$   
7  
8 210). This suggests a relationship between the pathologic phases of ARDS and  
9  
10 responsiveness to treatment. Whether the patients with fibroproliferative predominance  
11  
12 have different treatment strategies compared to those with exudative predominance has  
13  
14 been a vexing question<sup>4</sup>. Improving our understanding of disease state and evolution of  
15  
16 the disease may be key to the development of the optimal therapy and their timing. A  
17  
18 method that could be used to evaluate and calibrate the clinical to pathologic stages may  
19  
20 help prognosticate, alter supportive or therapeutic approach to ARDS such as ventilator  
21  
22 management and define the treatment window for those interventions. Further  
23  
24 prospective studies are needed to examine the efficacy of the drugs such as  
25  
26 corticosteroids according to the extent of fibroproliferation on HRCT scans.  
27  
28  
29  
30  
31  
32  
33  
34

35 There were some potential limitations. First, our study included few patients with  
36  
37 ARDS caused by major trauma, multiple transfusion and others, although it included  
38  
39 approximately 90% of the patients who had ARDS caused by three major etiologies  
40  
41 (pneumonia, aspiration, sepsis) of ARDS; thus, our study may not sufficiently reflect all  
42  
43 forms of ARDS. However, previous large randomized control studies also included  
44  
45 more than 70% of patients with these three etiologies<sup>26,30</sup>. Therefore, our results may  
46  
47 be applicable to most forms of ARDS.  
48  
49  
50  
51  
52

53 Second, many elderly patients (mean age, 75.0 years) were included. Clinically,  
54  
55 elderly ARDS patients show higher morbidity and need longer duration of mechanical  
56  
57  
58  
59  
60

1  
2  
3  
4  
5  
6 ventilation with subsequent poorer prognosis than the younger patients<sup>2, 35</sup>. The  
7  
8 age-related differences in mortality and outcomes have been considered to be due to the  
9  
10 greater number of comorbid illness and higher frequency of non-pulmonary organ  
11  
12 system failure in older patients<sup>35</sup>. In this study, preexisting pulmonary emphysema was  
13  
14 seen in 32 (38 %) of 85 patients. Although no significant differences were seen between  
15  
16 survivors and non-survivors in the number of a history of cigarette smoking and a  
17  
18 presence of emphysema, we could not evaluate the severity of emphysema before the  
19  
20 onset of ARDS. Such a smoking-induced chronic lung disease could potentially affect  
21  
22 ventilator-dependency or prognosis. Although it was problematic whether aging  
23  
24 increase susceptibility to lung injury and to pulmonary fibroproliferation, further  
25  
26 investigation of younger patients with ARDS is needed to confirm the consistency of  
27  
28 the results of our study.  
29  
30  
31  
32  
33  
34  
35  
36

37  
38 Third, no correlation was provided with either clinical parameters or pathologic  
39  
40 findings in the present study. Further investigation is necessary to compare HRCT  
41  
42 findings with other predictors of morbidity/mortality-i.e. inflammatory biomarkers such  
43  
44 as serum IL-6 or BAL PCP III levels. Recent studies of biopsy findings from ARDS  
45  
46 patients have reported the pathologic diversity and only half proportion of typical  
47  
48 diffuse alveolar damage<sup>5,6</sup>. Regardless of the cause or pathology of ARDS, our study  
49  
50 highlighted the extent of lung architectural distortion (areas with traction  
51  
52 bronchiectasis) indicating that pulmonary fibroproliferation on HRCT scans. Although  
53  
54  
55  
56  
57  
58  
59  
60



1  
2  
3  
4  
5  
6 fibroproliferative ARDS does not warrant different treatment strategies up to the present,  
7  
8  
9 prospective evaluation of HRCT findings in patients with ARDS would help therapeutic  
10  
11 implications in the development of treatment strategies based on the extent of  
12  
13  
14 fibroproliferation, as well as its prognostic implications.

15  
16 On the basis of our results, extensive HRCT abnormalities indicative of  
17  
18  
19 fibroproliferative changes on the day of ARDS diagnosis were independently predictive  
20  
21  
22 of poor prognosis and prolonged mechanical ventilation, and were also associated with  
23  
24  
25 subsequent multiple organ failure. Pulmonary fibroproliferation that occurs early in  
26  
27  
28 ARDS patients increases mortality risk by increasing susceptibility to ventilator  
29  
30  
31 dependency and its associated complications.  
32  
33  
34  
35  
36  
37  
38  
39  
40  
41  
42  
43  
44  
45  
46  
47  
48  
49  
50  
51  
52  
53  
54  
55  
56  
57  
58  
59  
60

## ACKNOWLEDGEMENTS

**Author contributions:** Dr Suga takes full responsibility for the integrity of all the data and the accuracy of the data analysis.

Dr Ichikado: contributed to designing the study, collecting the data, analyzing the data, and writing the manuscript.

Dr Muranaka: contributed to collecting data, analyzing the data, and revising the manuscript.

Dr Gushima: contributed to collecting data, analyzing the data, and revising the manuscript.

Dr Kotani: contributed to analyzing the data and revising the manuscript.

Dr Habashi: contributed to reanalyzing the data and revising the manuscript.

Dr Fujimoto: contributed to reanalyzing the data and revising the manuscript.

Dr Johkoh: contributed to reanalyzing the data and revising the manuscript.

Dr Iwamoto: contributed to collecting the data and revising the manuscript.

Dr Kawamura: contributed to collecting the data and revising the manuscript.

Dr Nagano: contributed to collecting the data and revising the manuscript.

Dr Fukuda: contributed to collecting the data and revising the manuscript.

Dr Hirata: contributed to collecting the data and revising the manuscript.

Dr Yoshinaga: contributed to reanalyzing the data and revising the manuscript.

Dr Ichiyasu: contributed to collecting the data and revising the manuscript.

Dr Tsumura: contributed to collecting the data and revising the manuscript.

Dr Kohrogi: contributed to reanalyzing the data and revising the manuscript.

Dr Kawaguchi: contributed to reanalyzing the data and revising the manuscript.

Dr Yoshioka: contributed to reanalyzing the data and revising the manuscript.

Dr Sakuma: contributed to reanalyzing the data and revising the manuscript.

**Other persons contributing to this study:** We appreciate Michael A. Matthay, MD<sup>1</sup>, and

Hiroshi Kubo, MD, PhD<sup>2</sup> for their editorial assistance and also thank Isamu Cho, MD, PhD<sup>3</sup>,

Tomoki Tanaka, MD<sup>3</sup>, Junichi Maehara, MD<sup>4</sup>, Shigeo Hiroshige, MD<sup>5</sup>, Makoto Takaki, MD<sup>5</sup>,

Mitsuko Honda, MD<sup>5</sup>, Naoko Arakawa, MD<sup>5</sup>, Yuko Yasuda, MD<sup>5</sup>, Makiko Takeguchi, MD<sup>5</sup>,

Aoi Teruya, MD<sup>5</sup>, Yoshitomo Eguchi, MD<sup>5</sup>, Naoki Shingu, MD<sup>5</sup>, and Yoshihiko Sakata, MD<sup>5</sup>

for their clinical assistance.

1) Departments of Medicine and Anesthesia, University of California, San Francisco, CA, USA

2) Department of Geriatric and Respiratory Medicine, Tohoku University School of Medicine, Tohoku

1  
2  
3  
4  
5  
6 University, Sendai City, Miyagi, Japan  
7

8 3) Department of Emergency and Critical Care Medicine, Saiseikai Kumamoto Hospital, Kumamoto,  
9 Japan  
10

11 4) Pulmonary Division, Kumamoto City Hospital, Kumamoto City, Japan  
12

13 5) Division of Respiratory Medicine, Saiseikai Kumamoto Hospital, Kumamoto, Japan  
14  
15  
16  
17  
18  
19  
20  
21  
22  
23  
24  
25  
26  
27  
28  
29  
30  
31  
32  
33  
34  
35  
36  
37  
38  
39  
40  
41  
42  
43  
44  
45  
46  
47  
48  
49  
50  
51  
52  
53  
54  
55  
56  
57  
58  
59  
60

For peer review only

**Table 1.** Clinical characteristics of patients on the day of ARDS onset

| Characteristic                                   | Total<br>(n = 85) | 60 days               |                                       | p value |
|--------------------------------------------------|-------------------|-----------------------|---------------------------------------|---------|
|                                                  |                   | Survivors<br>(n = 54) | Outcomes<br>Non-survivors<br>(n = 31) |         |
| Age (years)*                                     | 75 ± 10           | 75 ± 11               | 76 ± 10                               | 0.60    |
| Sex (M/F)                                        | 51/34             | 30/24                 | 21/10                                 | 0.38    |
| Cigarette smoking                                | 33                | 17                    | 16                                    | 0.11    |
| Presence of emphysema                            | 32                | 18                    | 14                                    | 0.39    |
| Liver cirrhosis (%)                              | 6 (7.1)           | 4 (7.4)               | 2 (6.5)                               | > 0.99  |
| Direct/indirect injury                           | 59/26             | 38/16                 | 21/10                                 | 0.81    |
| PaO <sub>2</sub> :FiO <sub>2</sub>               | 96.2 ± 45.6       | 96.5 ± 45.0           | 96.2 ± 47.5                           | 0.90    |
| Causes of lung injury                            |                   |                       |                                       |         |
| Pneumonia (%)                                    | 32 (37.6)         | 20                    | 12                                    | > 0.99  |
| Sepsis (%)                                       | 24 (28.2)         | 13                    | 11                                    | 0.38    |
| Pulmonary (%)                                    | 11 (12.9)         | 5                     | 6                                     | 0.20    |
| Extrapulmonary (%)                               | 13 (15.2)         | 8                     | 5                                     | > 0.99  |
| Aspiration (%)                                   | 22 (25.9)         | 16                    | 6                                     | 0.44    |
| Others (%)                                       | 7 (8.2)           | 5                     | 2                                     | > 0.99  |
| Lung injury score*                               | 3.2 ± 0.5         | 3.3 ± 0.5             | 3.3 ± 0.5                             | 0.88    |
| APACHE II score                                  | 21.0 ± 4.7        | 21.0 ± 4.6            | 22.0 ± 4.9                            | 0.76    |
| SOFA score                                       | 7.0 ± 2.8         | 7.0 ± 2.8             | 6.0 ± 2.9                             | 0.15    |
| McCabe score (1/2/3)                             | 78/5/2            | 49/4/1                | 29/1/1                                | > 0.99  |
| DIC score*#                                      | 2.4 ± 1.7         | 2.4 ± 1.7             | 2.5 ± 1.6                             | 0.68    |
| White blood cell count<br>(per mm <sup>3</sup> ) | 10600 ± 6788      | 10600 ± 6178          | 10600 ± 7839                          | 0.63    |

|                                              |             |             |             |        |
|----------------------------------------------|-------------|-------------|-------------|--------|
| C-reactive protein (CRP)<br>(mg/dl)          | 15.4 ± 10.3 | 15.4 ± 9.6  | 16.1 ± 11.5 | 0.69   |
| Albumin (g/dl)                               | 3.0 ± 0.5   | 3.1 ± 0.5   | 2.8 ± 0.5   | 0.11   |
| Lactate dehydrogenase<br>(LDH) (IU/L)        | 308 ± 185   | 301 ± 147   | 339 ± 235   | 0.29   |
| Platelet count (per mm <sup>3</sup> )        | 20.1 ± 10.7 | 20.7 ± 11.0 | 18.9 ± 10.3 | 0.94   |
| Days of CT scanning<br>from ARDS onset (day) | 1.0 ± 0.0   | 1.0 ± 0.0   | 1.0 ± 0.0   | > 0.99 |
| HRCT score #                                 | 207 ± 53    | 196 ± 54    | 233 ± 46    | 0.001  |
| Initial steroid therapy                      |             |             |             |        |
| High dose                                    | 14          | 7           | 7           | 0.36   |
| Low dose                                     | 71          | 47          | 24          | 0.36   |
| Ventilatory variables                        |             |             |             |        |
| Tidal volume, ml/kg<br>predicted body weight | 8.0 ± 0.8   | 8.0 ± 0.7   | 8.0 ± 0.9   | 0.54   |
| Plateau pressure, cmH <sub>2</sub> O         | 21.5 ± 4.2  | 21.0 ± 3.8  | 23.0 ± 4.7  | 0.34   |
| Initial PEEP, cmH <sub>2</sub> O             | 8.0 ± 3.4   | 8.0 ± 2.5   | 8.0 ± 4.3   | 0.18   |

Data are expressed as median ± standard deviation. \*Data are mean ± standard

deviation. The p values refer to comparisons between survivors and non-survivors.

# Score ≥ 4 defined as disseminated intravascular coagulation from scoring system for

The Japanese Association for Acute Medicine.

**Table 2.** Extent of each high-resolution CT finding in 60-days survivors and non-survivors of ARDS.

| CT Finding                                                                   | Survivors<br>(n = 54) | Non-survivors<br>(n = 31) | p value |
|------------------------------------------------------------------------------|-----------------------|---------------------------|---------|
| Spared area                                                                  | 37.0 ± 19.2           | 30.3 ± 14.9               | 0.15    |
| Ground-glass attenuation                                                     | 33.5 ± 22.9           | 30.0 ± 16.0               | 0.70    |
| Air-space consolidation                                                      | 17.5 ± 13.8           | 18.3 ± 19.3               | 0.72    |
| Total area without traction bronchiolectasis<br>or bronchiectasis            | 88.0 ± 22.0           | 78.2 ± 22.5               | 0.01    |
| Ground-glass attenuation plus traction<br>bronchiolectasis or bronchiectasis | 9.3 ± 17.8            | 16.6 ± 21.7               | 0.08    |
| Air-space consolidation plus traction<br>bronchiolectasis or bronchiectasis  | 2.4 ± 7.8             | 5.6 ± 10.3                | 0.01    |
| Honeycombing                                                                 | 0.0 ± 0.0             | 0.0 ± 0.0                 | NS      |
| Total area with traction bronchiolectasis<br>or bronchiectasis               | 11.8 ± 18.0           | 22.1 ± 24.3               | 0.01    |

Data are mean ± standard deviation of percentage of lung involvement.

NS = not significant

Mann-Whitney U test

**Table 3. Comparison of primary and secondary outcomes between the cut-off value showing extent of fibroproliferative changes on high-resolution CT at the onset of**

**ARDS**

| Variable                                   | High-Resolution Computed Tomographic<br>(CT) score |                   | p value  |
|--------------------------------------------|----------------------------------------------------|-------------------|----------|
|                                            | < 210<br>(n = 47)                                  | ≥ 210<br>(n = 38) |          |
| 60-Day mortality (%)                       | 19.1                                               | 57.9              | < 0.0001 |
| No. of hospital death                      | 9                                                  | 22                |          |
| Causes of death                            |                                                    |                   |          |
| Multiple organ failure                     | 8                                                  | 18                |          |
| Respiratory failure                        | 1                                                  | 4                 |          |
| No. of ventilator-free days at day 28      | 14.3 ± 7.6                                         | 5.1 ± 8.0         | < 0.0001 |
| No. of organ-failure-free days             |                                                    |                   |          |
| Cardiovascular failure                     | 22.4 ± 8.1                                         | 16.1 ± 10.9       | 0.009    |
| Coagulation abnormalities                  | 23.0 ± 8.9                                         | 17.8 ± 10.4       | 0.017    |
| Hepatic failure                            | 23.3 ± 8.2                                         | 19.6 ± 9.5        | 0.11     |
| Renal failure                              | 21.7 ± 10.9                                        | 19.6 ± 9.6        | 0.29     |
| No. of incidence of barotraumas (%)        | 3 (6.4)                                            | 8 (21.1)          | 0.056    |
| No. of ventilator-associated pneumonia (%) | 16 (34.0)                                          | 20 (52.6)         | 0.13     |

Plus-minus values are mean ± SD. Continuous variables with non-normal distribution were compared with the use of Mann-Whitney U test and categorical variables with Fisher's exact test.

**Table 4a. Univariate Cox regression analysis of variables potentially associated with mortality at day 180 in patients with ARDS.**

| Variable                                  | P value | Hazard ratio | 95% CI    |
|-------------------------------------------|---------|--------------|-----------|
| HRCT score                                | 0.0019  | 1.22*        | 1.08-1.38 |
| Age                                       | 0.5411  | 0.99         | 0.96-1.02 |
| Sepsis                                    | 0.4020  | 1.34         | 0.67-2.67 |
| APACHE II score                           | 0.6578  | 0.98         | 0.92-1.06 |
| SOFA score                                | 0.1724  | 0.92         | 0.82-1.04 |
| McCabe score                              | 0.9609  | 0.98         | 0.41-2.32 |
| PaO <sub>2</sub> / FiO <sub>2</sub> ratio | 0.6119  | 1.00         | 0.99-1.01 |
| Serum Albumin                             | 0.0982  | 0.57         | 0.30-1.11 |

**Table 4b. Multivariate Cox regression analysis of prognostic factors associated with mortality at day 180 in patients with ARDS**

| Variable      | P value | Hazard ratio | 95% CI    |
|---------------|---------|--------------|-----------|
| HRCT score    | 0.0051  | 1.20*        | 1.06-1.36 |
| Serum Albumin | 0.2618  | 0.67         | 0.33-1.36 |

Abbreviation: HRCT: high-resolution computed tomography

\*Expressed as mortality change per 10% increase in area of attenuation with traction bronchiectasis on high-resolution CT.



**Table 5. Multiple logistic regression analysis of variables potentially associated with ventilator-associated outcomes.**

**Table 5a. Ventilator-weaning within 28 days in patients with ARDS.**

| Variable      | P value | Odds ratio | 95% CI    |
|---------------|---------|------------|-----------|
| HRCT score    | 0.0006  | 0.63*      | 0.48-0.82 |
| Serum Albumin | 0.1727  | 2.09       | 0.72-6.03 |

Abbreviation: HRCT: high-resolution computed tomography

\*Expressed as mortality change per 10% increase in area of attenuation with traction bronchiectasis on high-resolution CT.

**Table 5b. The incidence of the Barotrauma**

| Variable      | P value | Odds ratio | 95% CI    |
|---------------|---------|------------|-----------|
| HRCT score    | 0.0183  | 1.61*      | 1.08-2.38 |
| APACHE II     | 0.4724  | 0.92       | 0.74-1.15 |
| SOFA score    | 0.9110  | 1.02       | 0.68-1.55 |
| Serum Albumin | 0.5156  | 0.53       | 0.08-3.65 |
| Serum LDH     | 0.0158  | 1.05       | 1.01-1.09 |

Abbreviation: HRCT: high-resolution computed tomography

\*Expressed as mortality change per 10% increase in area of attenuation with traction bronchiectasis on high-resolution CT.

**Table 5c. The complication of the Ventilator-associated pneumonia**

| Variable                                  | P value | Odds ratio | 95% CI      |
|-------------------------------------------|---------|------------|-------------|
| Liver cirrhosis                           | 0.0286  | 13.34      | 1.31-135.60 |
| HRCT score                                | 0.0041  | 1.46*      | 1.13-1.89   |
| PaO <sub>2</sub> / FiO <sub>2</sub> ratio | 0.0236  | 0.99       | 0.98-1.00   |

Abbreviation: HRCT: high-resolution computed tomography

\*Expressed as mortality change per 10% increase in area of attenuation with traction

bronchiectasis on high-resolution CT.

## FIGURE LEGENDS

Figure 1. Outlines of the study.

Figure 2. High-resolution computed tomography (CT) findings correlated with pathology

a.: High-resolution CT findings corresponding to exudative phase of ARDS. HRCT scan at the level of right middle lobe shows dependent airspace consolidation without traction bronchiectasis and nondependent areas of sparing. The patient was a 68-year-old man with ARDS due to *Streptococcus pneumoniae*.

b.: High-resolution CT findings corresponding to fibroproliferative phase of ARDS. HRCT scan at the level of right lower lobe shows extensive airspace consolidation and ground-glass attenuation associated with traction bronchiectasis (arrows). The patient was a 84-year-old woman with ARDS due to sepsis.

c.: High-resolution CT findings corresponding to fibrotic phase of ARDS. HRCT scan at the level of right inferior pulmonary vein shows extensive ground-glass attenuation associated with traction bronchiectasis (arrows), coarse reticulation and cystic changes (arrowheads). The patient was a 65-year-old woman with ARDS due to *viral pneumoniae*. (Sequential changes of HRCT findings were shown in the supplemental figure.)

Figure 3. Receiver operator characteristic (ROC) curve of prognostic value of the high-resolution computed tomography (HRCT) score. ROC identified the optimal cut-off value of 210 determined by the Youden Index for prediction of survival at Day 60 with 71 % sensitivity of and 72 % specificity (AUC, 0.71; 95% confidence interval, 0.61-0.82) and for prediction of survival at Day 180 with 71% sensitivity and 76 % specificity (AUC, 0.73; 95%CI, 0.62-0.84).

1  
2  
3  
4  
5  
6  
7  
8  
9  
10  
11  
12  
13  
14  
15  
16  
17  
18  
19  
20  
21  
22  
23  
24  
25  
26  
27  
28  
29  
30  
31  
32  
33  
34  
35  
36  
37  
38  
39  
40  
41  
42  
43  
44  
45  
46  
47  
48  
49  
50  
51  
52  
53  
54  
55  
56  
57  
58  
59  
60

Figure 4a. Day 60-mortality rate of each major cause of ARDS.

Figure 4b. Day 60-mortality rate compared between the optimal cut-off value of high-resolution computed tomography (HRCT) score in each cause. Regardless of the cause, the mortality rate of a patient with a lower CT score was significantly lower than that of a patient with a higher CT score.

Figure 5. Receiver operator characteristic (ROC) curve of prediction of the ventilator weaning within 28 days from high-resolution computed tomography (HRCT) score. ROC curve identified the optimal cut-off value of 210 determined by the Youden Index for prediction of ventilator weaning at day 28 with 75 % sensitivity and 76 % specificity (AUC, 0.77; 95%CI, 0.67-0.88).

Figure 6a. Receiver operator characteristic (ROC) curve of prediction of the onset of barotrauma from high-resolution computed tomography (HRCT) score. ROC curve identified the optimal cut-off value of 235 determined by the Youden Index for prediction of barotraumas onset with 73 % sensitivity and 77 % specificity (AUC, 0.77; 95%CI, 0.59-0.95)

Figure 6b. Comparison of the incidence of barotraumas between patients with the optimal cut-off value of CT score identified from ROC curve. The incidence of barotrauma of a patient with a lower CT score was significantly lower than that of a patient with a higher CT score.

Figure 7. Sequential changes of Sequential Organ Failure Assessment (SOFA) scores. The SOFA score of a patient with a lower CT score (< 210) significantly decreased from day 1 to day 14 ( $p = 0.0016$ ). The SOFA score of a patient of a patient with a higher CT

1  
2  
3  
4  
5  
6 score ( $\geq 210$ ) significantly increased from day 1 to day 14 ( $p = 0.027$ ). Four patients  
7  
8 with a lower CT score ( $< 210$ ) and 9 patients with a higher CT score ( $\geq 210$ ) who died  
9  
10 within 14 days were excluded.  
11  
12  
13  
14  
15  
16  
17  
18  
19  
20  
21  
22  
23  
24  
25  
26  
27  
28  
29  
30  
31  
32  
33  
34  
35  
36  
37  
38  
39  
40  
41  
42  
43  
44  
45  
46  
47  
48  
49  
50  
51  
52  
53  
54  
55  
56  
57  
58  
59  
60

For peer review only

**REFERENCES**

1. Ware LB, Matthay MA. The acute respiratory distress syndrome. *N Engl J Med* 2000;342:1334–1349
2. Bernard GR. Acute respiratory distress syndrome. A historical perspective. *Am J Respir Crit Care Med* 2005;172:798–806.
3. Tomashefski JF Jr. Pulmonary pathology of the adult respiratory distress syndrome. *Clin Chest Med* 1990;11:593-619.
4. Hudson LD, Hough CL. Therapy for late-phase acute respiratory distress syndrome. *Clin Chest Med* 2006; 27:671-677
5. Patel SR, Karpaliotis D, Ayas NT, et al. The role of open-lung biopsy in ARDS. *Chest* 2004;125:197-202.
6. Papazian L, Doddoli C, Chetaille B, et al. A contributive results of open-lung biopsy improves survival in acute respiratory distress syndrome patients. *Crit Care Med* 2007; 35:755-762.
7. Clark JG, Milberg JA, Steinberg KP, Hudson LD. Type III procollagen peptide in the adult respiratory distress syndrome: association of increased peptide levels in bronchoalveolar lavage fluid with increased risk for death. *Ann Intern Med* 1995;122:17-23.
8. Chesnutt AN, Matthay MA, Tibayan FA, Clark JG. Early detection of type III procollagen peptide in acute lung injury: pathogenetic and prognostic significance. *Am J Respir Crit Care Med* 1997; 156:840-845.
9. Meduri GU, Tolley EA, Chinn A, Stentz F, Postlethwaite A. Procollagen type I and III aminoterminal propeptide levels during acute respiratory distress syndrome and in response to methylprednisolone treatment. *Am J Respir Crit Care Med* 1998;158:1432–1441.
10. Marshall RP, Bellingan G, Webb S, et al. Fibroproliferation occurs early in the acute

1  
2  
3  
4  
5  
6 respiratory distress syndrome and impacts on outcome. *Am J Respir Crit Care Med*  
7  
8  
9 2000;162:1783–1788.

10  
11 11. Ichikado K, Johkoh T, Ikezoe J, *et al.* Acute interstitial pneumonia: high-resolution  
12  
13 CT findings correlated with pathology. *Am J Roentgenol* 1997;168:333–338.

14  
15 12. Ichikado K, Suga M, Gushima Y, *et al.* Hyperoxia-induced diffuse alveolar damage  
16  
17 in pigs: correlation between thin-section CT and histopathologic findings. *Radiology*  
18  
19 2000;216:531–538.

20  
21  
22 13. Ichikado K, Suga M, Müller NL, *et al.* Acute interstitial pneumonia: comparison of  
23  
24 high-resolution computed tomography findings between survivors and non-survivors.  
25  
26 *Am J Respir Crit Care Med* 2002;165:1551–1556.

27  
28  
29 14. Ichikado K. Permeability edema. In: Muller NL, Silva IS eds, *Imaging of the chest*,  
30  
31 Philadelphia: Saunders Elsevier, 2008; 964-977.

32  
33 15. Ichikado K, Suga M, Muranaka H, *et al.* Prediction of prognosis for acute  
34  
35 respiratory distress syndrome with thin-section CT: validation in 44 cases. *Radiology*  
36  
37 2006; 238:321-329.

38  
39 16. Bernard GR, Artigas A, Brigham KL, *et al.* The American-European Consensus  
40  
41 Conference on ARDS. Definitions, mechanisms, relevant outcomes, and clinical trial  
42  
43 coordination. *Am J Respir Crit Care Med* 1994;149:818–824.

44  
45 17. Fujimoto K, Taniguchi H, Johkoh T, *et al.* Acute exacerbation of idiopathic  
46  
47 pulmonary fibrosis: high-resolution CT scores predict mortality. *Eur Radiol* 2011 (in  
48  
49 press)

50  
51 18. Mukae H, Ishimoto H, Sakamoto N, *et al.* Clinical differences between interstitial  
52  
53 lung disease associated with clinically amyopathic dermatomyositis and classic  
54  
55 dermatomyositis. *CHEST* 2009;136:1341-1347.

56  
57 19. Committee for the Japanese Respiratory Society Guidelines for the Management of  
58  
59  
60

1  
2  
3  
4  
5  
6 Respiratory Infections. Empiric treatment of community-acquired pneumonia in adults.

7  
8  
9 *Respirology* 2006;11:S101-S101

10  
11 20. Committee for the Japanese Respiratory Society Guidelines for the Management of  
12 Respiratory Infections. Antibacterial therapy of hospital-acquired pneumonia.

13  
14  
15 *Respirology* 2004; 9 (suppl):S16-24

16  
17 21. The Japanese Association for Infectious Diseases and The Japanese Society of  
18 Chemotherapy Guidelines for Antimicrobial Use (in Japanese). In: The Japanese  
19 Association for Infectious Diseases and The Japanese Society of Chemotherapy eds,  
20 Tokyo: Kyowakikaku, 2005; p84-88, p106-121.

21  
22 22. Committee for the Japanese Respiratory Society Guidelines for the Acute Lung  
23 Injury and Acute Respiratory Distress Syndrome (in Japanese). In: The Japanese  
24 Respiratory Society eds, Tokyo:Nankoudo, 2004;p33-47.

25  
26 23. Clinical practice guidelines for acute respiratory distress syndrome. *The Japanese*  
27 *Journal of Respiratory Care* 2004;21:44-61.

28  
29 24. American Thoracic Society. Guidelines for the management of adults with  
30 community-acquired pneumonia: diagnosis, assessment of severity, antimicrobial  
31 therapy, and prevention. *Am J Respir Crit Care Med* 2001; 163:1730-1754

32  
33 25. Mandell LA, Bartlett JG, Dowell SF, et al. Update of practice guidelines for  
34 management of community-acquired pneumonia in immunocompetent adults. *Infectious*  
35 *Diseases Society of America. Clin Infect Dis* 2003; 37:1405-1432

36  
37 26. Steinberg KP, Hudson LD, Goodman RB, et al. Efficacy and safety of  
38 corticosteroids for persistent acute respiratory distress syndrome. *N Engl J Med*  
39 2006;354: 1671-1684

40  
41 27. Peter JV, John P, Graham P, Moran JL, Geroge IA, Bersten A. Corticosteroids in the  
42 prevention and treatment of acute respiratory distress syndrome (ARDS) in adults:  
43 meta-analysis. *BMJ* 2008;336(7651):1006-1009



- 1  
2  
3  
4  
5  
6 28. Tang BMP, Craig JC, Eslick GD, Seppelt I, McLean AS. Use of corticosteroids in  
7 acute lung injury and acute respiratory distress syndrome: a systemic review and  
8 meta-analysis. *Crit Care Med* 2009;37:1594-1603  
9  
10  
11 29. Muduri GU, Headley AS, Golden E, et al. Effect of prolonged methylprednisolone  
12 therapy in unresolving acute respiratory distress syndrome. A randomized control trial.  
13 *JAMA* 1998;280:159-165  
14  
15  
16 30. Ventilation with lower tidal volumes as compared with traditional tidal volumes for  
17 acute lung injury and the acute respiratory distress syndrome. The Acute Respiratory  
18 Distress Syndrome Network. *N Engl J Med* 2000; 342(18):1301-1308  
19  
20  
21 31. Evidence-based guidelines for weaning and discontinuing ventilatory support.  
22 *CHEST* 2001;120:375S-395S  
23  
24  
25 32. Pinhu L, Whitehead T, Evans T, et al. Ventilator-associated lung injury. *Lancet*  
26 2003;361:332-340.24.  
27  
28  
29 33. Fagon JY, Chastretre J, Domart Y, et al. Nosocomial pneumonia in patients receiving  
30 continuous mechanical ventilation. Prospective analysis of 52 episodes with use of a  
31 protected specimen brush and quantitative culture techniques. *Am Rev Respir Dis*  
32 1989;139:877-884.  
33  
34  
35 34. Monchi M, Bellenfant F, Cariou A, et al. Early predictive factors of survival in the  
36 acute respiratory distress syndrome. A multivariate analysis. *Am J Respir Crit Care Med*  
37 1998;158:1076-1081.  
38  
39  
40 35. Ely EW, Wheeler AP, Thompson BT, et al. Recovery rate and prognosis in older  
41 persons who developed acute lung injury and the acute respiratory distress syndrome.  
42 *Ann Intern Med* 2002;136:25-36.  
43  
44  
45 36. Estenssoro E, Dubin A, Laffaire E, et al. Incidence, clinical course, and outcome in  
46 217 patients with acute respiratory distress syndrome. *Crit Care Med*  
47 2002;30:2450-2456.  
48  
49  
50  
51  
52  
53  
54  
55  
56  
57  
58  
59  
60

1  
2  
3  
4  
5  
6 37. Esteban A, Anzueto A, Frutos F, et al. Characteristics and outcomes in adult patients  
7 receiving mechanical ventilation. *JAMA* 2002;287:345-355.

8  
9  
10 38. Gattinoni L, Bombino M, Pelosi P, et al. Lung structure and function in different  
11 stages of severe adult respiratory distress syndrome. *JAMA* 1994;271:1772-1779.

12  
13 39. Lamy M, Fallat RJ, Koeniger E, et al. Pathologic features and mechanisms of  
14 hypoxemia in adult respiratory distress syndrome. *Am Rev Respir Dis*  
15  
16 1976;114:267-287.  
17  
18  
19  
20  
21  
22  
23  
24  
25  
26  
27  
28  
29  
30  
31  
32  
33  
34  
35  
36  
37  
38  
39  
40  
41  
42  
43  
44  
45  
46  
47  
48  
49  
50  
51  
52  
53  
54  
55  
56  
57  
58  
59  
60

1  
2  
3  
4  
5  
6 **Patient confidentiality**

7  
8 Details has been removed from this case description.  
9  
10  
11  
12  
13  
14  
15  
16  
17  
18  
19  
20  
21  
22  
23  
24  
25  
26  
27  
28  
29  
30  
31  
32  
33  
34  
35  
36  
37  
38  
39  
40  
41  
42  
43  
44  
45  
46  
47  
48  
49  
50  
51  
52  
53  
54  
55  
56  
57  
58  
59  
60

For peer review only

Figure 1.

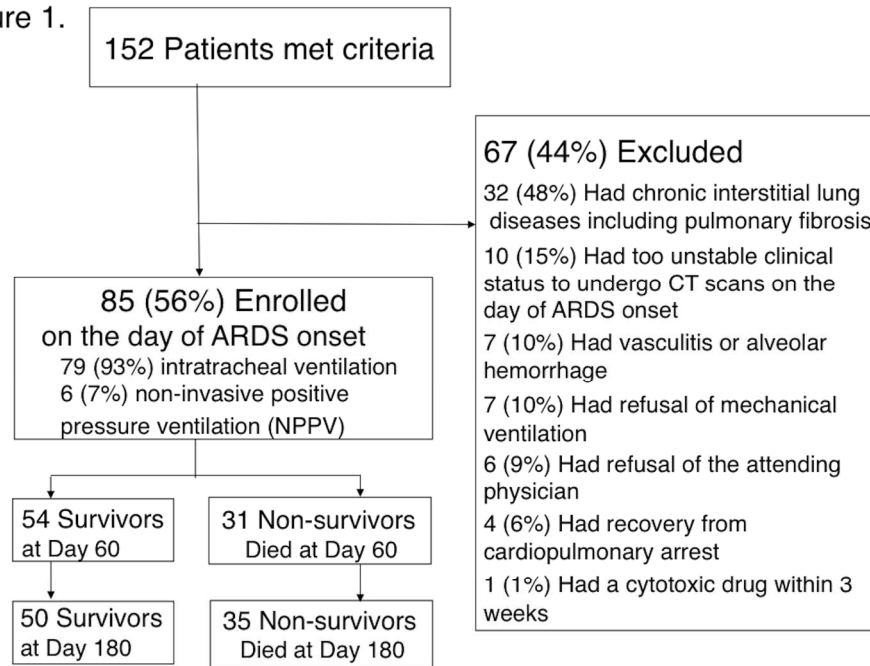

Outlines of the study.  
180x124mm (300 x 300 DPI)

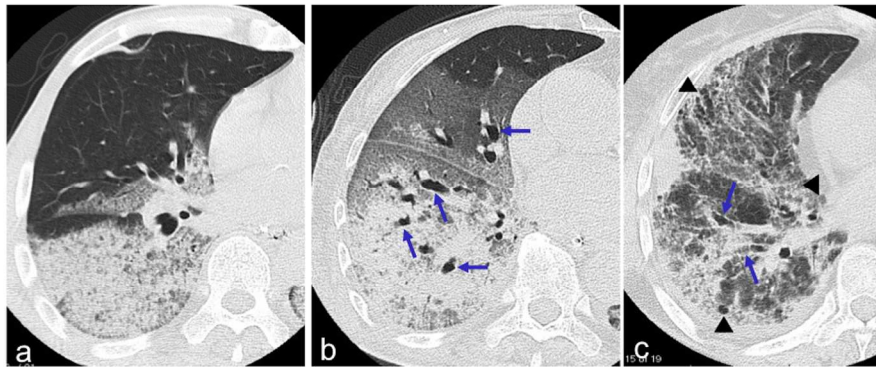

Figure 2a: High-resolution CT findings corresponding to exudative phase of ARDS. HRCT scan at the level of right middle lobe shows dependent airspace consolidation and nondependent areas of sparing. The patient was a 68-year-old man with ARDS due to *Streptococcus pneumoniae* pneumonia.

Figure 2b: High-resolution CT findings corresponding to fibroproliferative phase of ARDS. HRCT scan at the level of right lower lobe shows extensive airspace consolidation and ground-glass attenuation associated with traction bronchiectasis (arrows). The patient was a 84-year-old woman with ARDS due to sepsis.

Figure 2c: High-resolution CT findings corresponding to fibrotic phase of ARDS. HRCT scan at the level of right inferior pulmonary vein shows extensive ground-glass attenuation associated with traction bronchiectasis (arrows), coarse reticulation and cystic changes (arrowheads). The patient was a 65-year-old woman with ARDS due to viral pneumonia. (Sequential changes of HRCT findings were shown in the supplemental figure.)

#### High-resolution computed tomography (CT) findings correlated with pathology

- a.: High-resolution CT findings corresponding to exudative phase of ARDS. HRCT scan at the level of right middle lobe shows dependent airspace consolidation without traction bronchiectasis and nondependent areas of sparing. The patient was a 68-year-old man with ARDS due to *Streptococcus pneumoniae*.
- b.: High-resolution CT findings corresponding to fibroproliferative phase of ARDS. HRCT scan at the level of right lower lobe shows extensive airspace consolidation and ground-glass attenuation associated with traction bronchiectasis (arrows). The patient was a 84-year-old woman with ARDS due to sepsis.
- c.: High-resolution CT findings corresponding to fibrotic phase of ARDS. HRCT scan at the level of right inferior pulmonary vein shows extensive ground-glass attenuation associated with traction bronchiectasis (arrows), coarse reticulation and cystic changes (arrowheads). The patient was a 65-year-old woman with ARDS due to viral pneumonia. (Sequential changes of HRCT findings were shown in the supplemental figure.)

180x124mm (300 x 300 DPI)

Figure 3 Receiver Operating Characteristic Curve of the prediction of Day 60 and Day 180 mortality

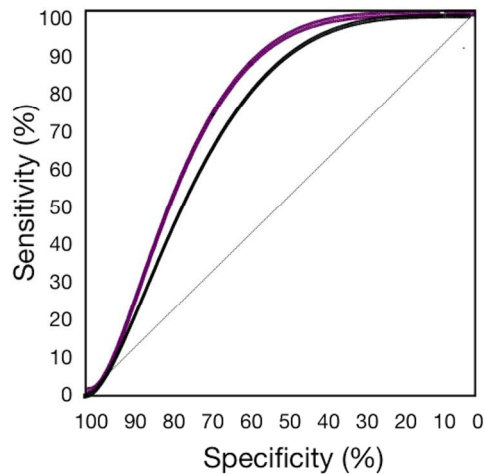

— Day 60 mortality; AUC, 0.71 (0.61-0.82); sensitivity, 71 %, specificity, 72 %  
— Day 180 mortality; AUC 0.73 (0.62-0.84); sensitivity, 71 %, specificity, 76 %

Receiver operator characteristic (ROC) curve of prognostic value of the high-resolution computed tomography (HRCT) score. ROC identified the optimal cut-off value of 210 determined by the Youden Index for prediction of survival at Day 60 with 71 % sensitivity of and 72 % specificity (AUC, 0.71; 95% confidence interval, 0.61-0.82) and for prediction of survival at Day 180 with 71% sensitivity and 76 % specificity (AUC, 0.73; 95%CI, 0.62-0.84).  
180x124mm (300 x 300 DPI)

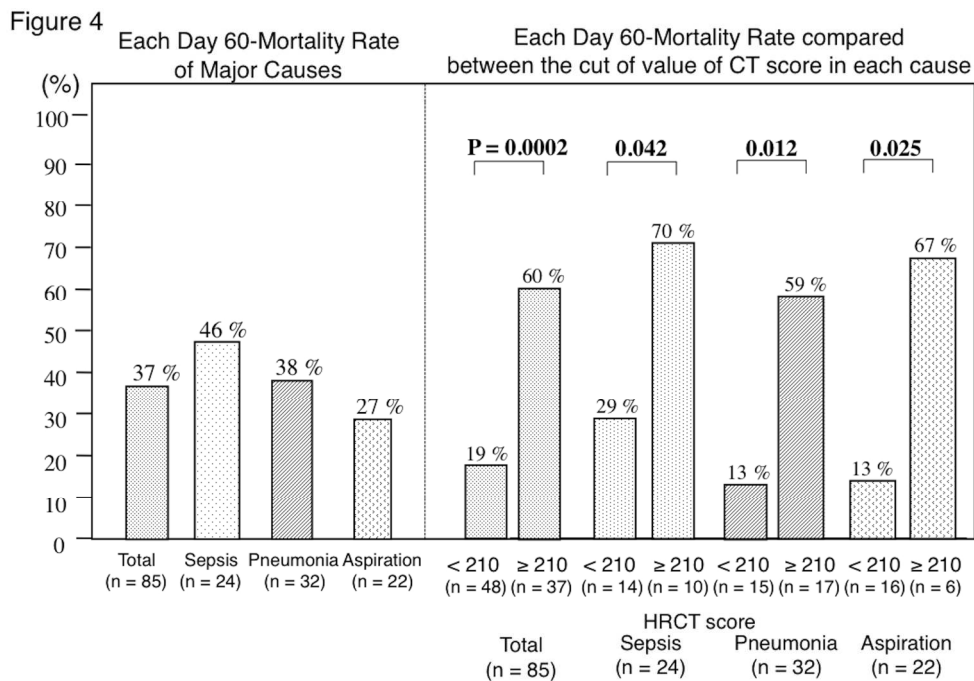

Figure 4a. Day 60-mortality rate of each major cause of ARDS.

Figure 4b. Day 60-mortality rate compared between the optimal cut-off value of high-resolution computed tomography (HRCT) score in each cause. Regardless of the cause, the mortality rate of a patient with a lower CT score was significantly lower than that of a patient with a higher CT score.

180x124mm (300 x 300 DPI)

Figure 5  
Receiver Operating Characteristic Curve of the prediction of  
ventilator weaning during 28 days

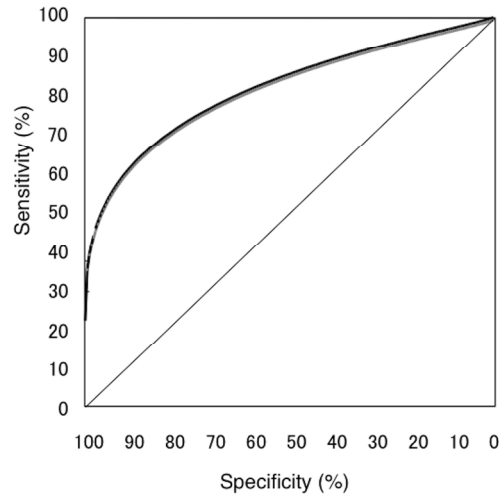

AUC, 0.77 (0.67-0.88); sensitivity, 75 %, specificity, 76 %

Receiver operator characteristic (ROC) curve of prediction of the ventilator weaning within 28 days from high-resolution computed tomography (HRCT) score. ROC curve identified the optimal cut-off value of 210 determined by the Youden Index for prediction of ventilator weaning at day 28 with 75 % sensitivity and 76 % specificity (AUC, 0.77; 95%CI, 0.67-0.88).

180x124mm (300 x 300 DPI)



Figure 6a.  
Receiver operating characteristics curve of the prediction  
of the onset of barotrauma

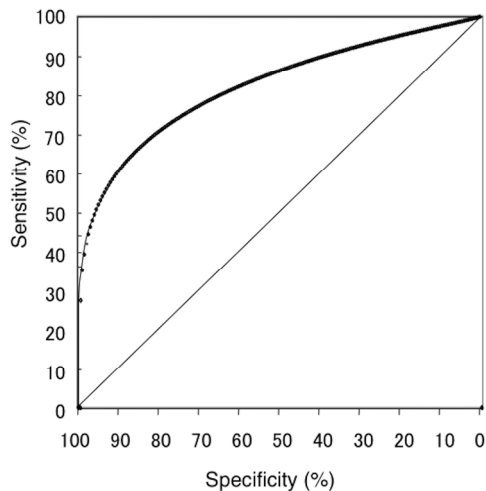

AUC, 0.77 (0.59-0.95); sensitivity, 73 %, specificity, 77 %

Figure 6b.  
Incidence of barotrauma  
Compared between the cut of value  
of CT score

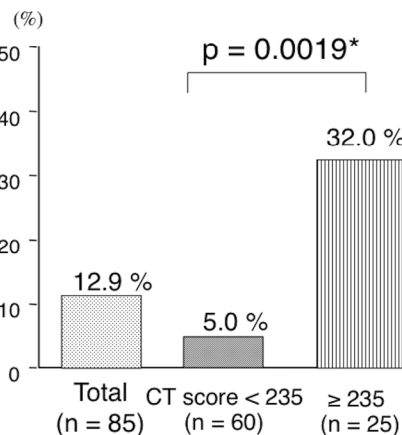

Figure 6a. Receiver operator characteristic (ROC) curve of prediction of the onset of barotrauma from high-resolution computed tomography (HRCT) score. ROC curve identified the optimal cut-off value of 235 determined by the Youden Index for prediction of barotraumias onset with 73 % sensitivity and 77 % specificity (AUC, 0.77; 95%CI, 0.59-0.95)

Figure 6b. Comparison of the incidence of barotraumias between patients with the optimal cut-off value of CT score identified from ROC curve. The incidence of barotrauma of a patient with a lower CT score was significantly lower than that of a patient with a higher CT score.

180x124mm (300 x 300 DPI)

Figure 7. Sequential changes of SOFA score

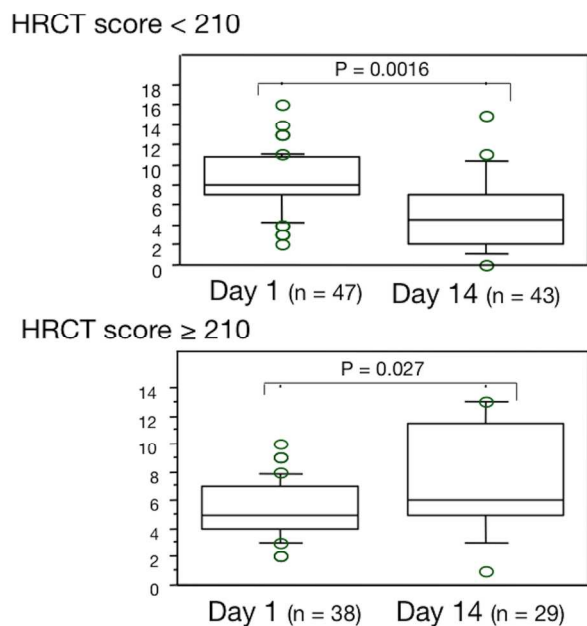

Sequential changes of Sequential Organ Failure Assessment (SOFA) scores. The SOFA score of a patient with a lower CT score (< 210) significantly decreased from day 1 to day 14 ( $p = 0.0016$ ). The SOFA score of a patient of a patient with a higher CT score ( $\geq 210$ ) significantly increased from day 1 to day 14 ( $p = 0.027$ ). Four patients with a lower CT score (< 210) and 9 patients with a higher CT score ( $\geq 210$ ) who died within 14 days were excluded.

180x134mm (300 x 300 DPI)

STROBE 2007 (v4) Statement—Checklist of items that should be included in reports of *cohort studies*

| Section/Topic                | Item # | Recommendation                                                                                                                                                                       | Reported on page # |
|------------------------------|--------|--------------------------------------------------------------------------------------------------------------------------------------------------------------------------------------|--------------------|
| Title and abstract           | 1      | (a) Indicate the study's design with a commonly used term in the title or the abstract                                                                                               | Page 4             |
|                              |        | (b) Provide in the abstract an informative and balanced summary of what was done and what was found                                                                                  | Page 4             |
| <b>Introduction</b>          |        |                                                                                                                                                                                      | <b>Page 7-8</b>    |
| Background/rationale         | 2      | Explain the scientific background and rationale for the investigation being reported                                                                                                 | Page 7-8           |
| Objectives                   | 3      | State specific objectives, including any prespecified hypotheses                                                                                                                     | Page 8             |
| <b>Methods</b>               |        |                                                                                                                                                                                      | <b>Page 8-13</b>   |
| Study design                 | 4      | Present key elements of study design early in the paper                                                                                                                              | Page 8             |
| Setting                      | 5      | Describe the setting, locations, and relevant dates, including periods of recruitment, exposure, follow-up, and data collection                                                      | Page 8, 12         |
| Participants                 | 6      | (a) Give the eligibility criteria, and the sources and methods of selection of participants. Describe methods of follow-up                                                           | Page 8             |
|                              |        | (b) For matched studies, give matching criteria and number of exposed and unexposed                                                                                                  | Page 26, Table 1   |
| Variables                    | 7      | Clearly define all outcomes, exposures, predictors, potential confounders, and effect modifiers. Give diagnostic criteria, if applicable                                             | Page 12            |
| Data sources/<br>measurement | 8*     | For each variable of interest, give sources of data and details of methods of assessment (measurement). Describe comparability of assessment methods if there is more than one group | Page 8-12          |
| Bias                         | 9      | Describe any efforts to address potential sources of bias                                                                                                                            | Page 8             |
| Study size                   | 10     | Explain how the study size was arrived at                                                                                                                                            | Page 8             |
| Quantitative variables       | 11     | Explain how quantitative variables were handled in the analyses. If applicable, describe which groupings were chosen and why                                                         | Page 8-12          |
| Statistical methods          | 12     | (a) Describe all statistical methods, including those used to control for confounding                                                                                                | Page 13            |
|                              |        | (b) Describe any methods used to examine subgroups and interactions                                                                                                                  | Page 13            |
|                              |        | (c) Explain how missing data were addressed                                                                                                                                          | Figure 1           |
|                              |        | (d) If applicable, explain how loss to follow-up was addressed                                                                                                                       | Figure 1           |
|                              |        | (e) Describe any sensitivity analyses                                                                                                                                                | Page 13            |
| <b>Results</b>               |        |                                                                                                                                                                                      | <b>Page 14-17</b>  |

1  
2  
3  
4  
5  
6  
7  
8  
9  
10  
11  
12  
13  
14  
15  
16  
17  
18  
19  
20  
21  
22  
23  
24  
25  
26  
27  
28  
29  
30  
31  
32  
33  
34  
35  
36  
37  
38  
39  
40  
41  
42  
43  
44  
45  
46  
47  
48  
49

|                          |     |                                                                                                                                                                                                                                                                                                                                                                                                               |                                                                    |
|--------------------------|-----|---------------------------------------------------------------------------------------------------------------------------------------------------------------------------------------------------------------------------------------------------------------------------------------------------------------------------------------------------------------------------------------------------------------|--------------------------------------------------------------------|
| Participants             | 13* | (a) Report numbers of individuals at each stage of study—eg numbers potentially eligible, examined for eligibility, confirmed eligible, included in the study, completing follow-up, and analysed<br>(b) Give reasons for non-participation at each stage<br>(c) Consider use of a flow diagram                                                                                                               | Page 14, Figure 1<br>Page 14, Figure 1<br>Page 14, Figure 1        |
| Descriptive data         | 14* | (a) Give characteristics of study participants (eg demographic, clinical, social) and information on exposures and potential confounders<br>(b) Indicate number of participants with missing data for each variable of interest<br>(c) Summarise follow-up time (eg, average and total amount)                                                                                                                | Page 26, Table 1<br>Figure 1<br>Figure 1                           |
| Outcome data             | 15* | Report numbers of outcome events or summary measures over time                                                                                                                                                                                                                                                                                                                                                | Page 29, Table 3                                                   |
| Main results             | 16  | (a) Give unadjusted estimates and, if applicable, confounder-adjusted estimates and their precision (eg, 95% confidence interval). Make clear which confounders were adjusted for and why they were included<br>(b) Report category boundaries when continuous variables were categorized<br>(c) If relevant, consider translating estimates of relative risk into absolute risk for a meaningful time period | Page 30-32, Table 4-5<br>Page 29, Table 3<br>Page 30-32, Table 4-5 |
| Other analyses           | 17  | Report other analyses done—eg analyses of subgroups and interactions, and sensitivity analyses                                                                                                                                                                                                                                                                                                                | Figure 3-7                                                         |
| <b>Discussion</b>        |     |                                                                                                                                                                                                                                                                                                                                                                                                               | Page 18-23                                                         |
| Key results              | 18  | Summarise key results with reference to study objectives                                                                                                                                                                                                                                                                                                                                                      | Page 3                                                             |
| <b>Limitations</b>       |     |                                                                                                                                                                                                                                                                                                                                                                                                               | Page 21-23                                                         |
| Interpretation           | 20  | Give a cautious overall interpretation of results considering objectives, limitations, multiplicity of analyses, results from similar studies, and other relevant evidence                                                                                                                                                                                                                                    | Page 3                                                             |
| Generalisability         | 21  | Discuss the generalisability (external validity) of the study results                                                                                                                                                                                                                                                                                                                                         | Page 21-23                                                         |
| <b>Other information</b> |     |                                                                                                                                                                                                                                                                                                                                                                                                               | Page 2, 24-25, 41                                                  |
| Funding                  | 22  | Give the source of funding and the role of the funders for the present study and, if applicable, for the original study on which the present article is based                                                                                                                                                                                                                                                 | Page 5                                                             |

\*Give information separately for cases and controls in case-control studies and, if applicable, for exposed and unexposed groups in cohort and cross-sectional studies.

**Note:** An Explanation and Elaboration article discusses each checklist item and gives methodological background and published examples of transparent reporting. The STROBE checklist is best used in conjunction with this article (freely available on the Web sites of PLoS Medicine at <http://www.plosmedicine.org/>, Annals of Internal Medicine at <http://www.annals.org/>, and Epidemiology at <http://www.epidem.com/>). Information on the STROBE Initiative is available at [www.strobe-statement.org](http://www.strobe-statement.org).

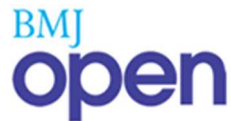

**Fibroproliferative Changes on High-Resolution Computed Tomography in the Acute Respiratory Distress Syndrome Predict Mortality and Ventilator Dependency: A Prospective Observational Cohort Study**

|                                 |                                                                                                                                                                                                                                                                                                                                                                                                                                                                                                                                                                                                                                                                                                                                                                                                                                                                                                                                                                                                                                                                                                                                                                                                                                                                                                                                                                                                                                                                                                                                                                                                                                                                                                                                                                                                                                                                                            |
|---------------------------------|--------------------------------------------------------------------------------------------------------------------------------------------------------------------------------------------------------------------------------------------------------------------------------------------------------------------------------------------------------------------------------------------------------------------------------------------------------------------------------------------------------------------------------------------------------------------------------------------------------------------------------------------------------------------------------------------------------------------------------------------------------------------------------------------------------------------------------------------------------------------------------------------------------------------------------------------------------------------------------------------------------------------------------------------------------------------------------------------------------------------------------------------------------------------------------------------------------------------------------------------------------------------------------------------------------------------------------------------------------------------------------------------------------------------------------------------------------------------------------------------------------------------------------------------------------------------------------------------------------------------------------------------------------------------------------------------------------------------------------------------------------------------------------------------------------------------------------------------------------------------------------------------|
| Journal:                        | <i>BMJ Open</i>                                                                                                                                                                                                                                                                                                                                                                                                                                                                                                                                                                                                                                                                                                                                                                                                                                                                                                                                                                                                                                                                                                                                                                                                                                                                                                                                                                                                                                                                                                                                                                                                                                                                                                                                                                                                                                                                            |
| Manuscript ID:                  | bmjopen-2011-000545.R1                                                                                                                                                                                                                                                                                                                                                                                                                                                                                                                                                                                                                                                                                                                                                                                                                                                                                                                                                                                                                                                                                                                                                                                                                                                                                                                                                                                                                                                                                                                                                                                                                                                                                                                                                                                                                                                                     |
| Article Type:                   | Research                                                                                                                                                                                                                                                                                                                                                                                                                                                                                                                                                                                                                                                                                                                                                                                                                                                                                                                                                                                                                                                                                                                                                                                                                                                                                                                                                                                                                                                                                                                                                                                                                                                                                                                                                                                                                                                                                   |
| Date Submitted by the Author:   | 24-Dec-2011                                                                                                                                                                                                                                                                                                                                                                                                                                                                                                                                                                                                                                                                                                                                                                                                                                                                                                                                                                                                                                                                                                                                                                                                                                                                                                                                                                                                                                                                                                                                                                                                                                                                                                                                                                                                                                                                                |
| Complete List of Authors:       | <p>Ichikado, Kazuya; Saiseikai Kumamoto Hospital, Division of Respiratory Medicine<br/> Muranaka, Hiroyuki; Saiseikai Kumamoto Hospital, Division of Respiratory Medicine<br/> Gushima, Yasuhiro; Saiseikai Kumamoto Hospital, Division of Respiratory Medicine<br/> Kotani, Toru; Tokyo Women's Medical University, Department of Anesthesiology and Intensive Care<br/> Nader, Habashi; R Adams Cowley Shock Trauma Center, Multi-trauma Intensive Care Unit<br/> Fujimoto, Kiminori; Kurume University School of Medicine, Department of Radiology; Kurume University Hospital, Center for Diagnostic Imaging<br/> Johkoh, Takeshi; Kinki Central Hospital of Mutual Aid Association of Public Teachers, Department of Radiology<br/> Iwamoto, Norihiro; Saiseikai Kumamoto Hospital, Division of Respiratory Medicine<br/> Kawamura, Kodai; Saiseikai Kumamoto Hospital, Division of Respiratory Medicine<br/> Nagano, Junji; Kumamoto City Hospital, Pulmonary Division<br/> Fukuda, Kohichiro; Kumamoto City Hospital, Pulmonary Division<br/> Hirata, Naomi; Kumamoto Chu-oh Hospital, Pulmonary Division<br/> Yoshinaga, Takeshi; Kumamoto Chu-oh Hospital, Pulmonary Division<br/> Ichiyasu, Hidenori; Kumamoto University Graduate School of Medical Sciences, Department of Respiratory Medicine<br/> Tsumura, Shinsuke; Kumamoto University Graduate School of Medical Sciences, Department of Respiratory Medicine<br/> Kohrogi, Hirotsugu; Kumamoto University Graduate School of Medical Sciences, Department of Respiratory Medicine<br/> Kawaguchi, Atsushi; Biostatistics Center, Kurume University School of Medicine<br/> Yoshioka, Masakazu; Saiseikai Kumamoto Hospital, Division of Respiratory Medicine<br/> Sakuma, Tsutomu; Kanazawa Medical University, Thoracic Surgery<br/> Suga, Moritaka; Saiseikai Kumamoto Hospital, Division of Respiratory Medicine</p> |
| <b>Primary Subject Heading</b>: | Respiratory medicine                                                                                                                                                                                                                                                                                                                                                                                                                                                                                                                                                                                                                                                                                                                                                                                                                                                                                                                                                                                                                                                                                                                                                                                                                                                                                                                                                                                                                                                                                                                                                                                                                                                                                                                                                                                                                                                                       |

1  
2  
3  
4  
5  
6  
7  
8  
9  
10  
11  
12  
13  
14  
15  
16  
17  
18  
19  
20  
21  
22  
23  
24  
25  
26  
27  
28  
29  
30  
31  
32  
33  
34  
35  
36  
37  
38  
39  
40  
41  
42  
43  
44  
45  
46  
47  
48  
49  
50  
51  
52  
53  
54  
55  
56  
57  
58  
59  
60

|                            |                                                                                                                            |
|----------------------------|----------------------------------------------------------------------------------------------------------------------------|
| Secondary Subject Heading: | Intensive care, Radiology and imaging                                                                                      |
| Keywords:                  | Adult intensive & critical care < ANAESTHETICS, Thoracic medicine < INTERNAL MEDICINE, Chest imaging < RADIOLOGY & IMAGING |
|                            |                                                                                                                            |

SCHOLARONE™  
Manuscripts

For peer review only



Figure 2a: High-resolution CT findings corresponding to exudative phase of ARDS. HRCT scan at the level of right middle lobe shows dependent airspace consolidation and nondependent areas of sparing. The patient was a 68-year-old man with ARDS due to *Streptococcus pneumoniae* pneumonia.

Figure 2b: High-resolution CT findings corresponding to fibroproliferative phase of ARDS. HRCT scan at the level of right lower lobe shows extensive airspace consolidation and ground-glass attenuation associated with traction bronchiectasis (arrows). The patient was a 84-year-old woman with ARDS due to *sepsis*.

Figure 2c: High-resolution CT findings corresponding to fibrotic phase of ARDS. HRCT scan at the level of right inferior pulmonary vein shows extensive ground-glass attenuation associated with traction bronchiectasis (arrows), coarse reticulation and cystic changes (arrowheads). The patient was a 65-year-old woman with ARDS due to *viral pneumonia*. (Sequential changes of HRCT findings were shown in the supplemental figure.)

#### High-resolution computed tomography (CT) findings correlated with pathology

- a.: High-resolution CT findings corresponding to exudative phase of ARDS. HRCT scan at the level of right middle lobe shows dependent airspace consolidation without traction bronchiectasis and nondependent areas of sparing. The patient was a 68-year-old man with ARDS due to *Streptococcus pneumoniae*.
- b.: High-resolution CT findings corresponding to fibroproliferative phase of ARDS. HRCT scan at the level of right lower lobe shows extensive airspace consolidation and ground-glass attenuation associated with traction bronchiectasis (arrows). The patient was a 84-year-old woman with ARDS due to *sepsis*.
- c.: High-resolution CT findings corresponding to fibrotic phase of ARDS. HRCT scan at the level of right inferior pulmonary vein shows extensive ground-glass attenuation associated with traction bronchiectasis (arrows), coarse reticulation and cystic changes (arrowheads). The patient was a 65-year-old woman with ARDS due to *viral pneumonia*. (Sequential changes of HRCT findings were shown in the supplemental figure.)

180x124mm (300 x 300 DPI)

Figure 3 Receiver Operating Characteristic Curve of the prediction of Day 60 and Day 180 mortality



— Day 60 mortality; AUC, 0.71 (0.61-0.82); sensitivity, 71 %, specificity, 72 %  
— Day 180 mortality; AUC 0.73 (0.62-0.84); sensitivity, 71 %, specificity, 76 %

Receiver operator characteristic (ROC) curve of prognostic value of the high-resolution computed tomography (HRCT) score. ROC identified the optimal cut-off value of 210 determined by the Youden Index for prediction of survival at Day 60 with 71 % sensitivity of and 72 % specificity (AUC, 0.71; 95% confidence interval, 0.61-0.82) and for prediction of survival at Day 180 with 71% sensitivity and 76 % specificity (AUC, 0.73; 95%CI, 0.62-0.84).  
180x124mm (300 x 300 DPI)





Figure 4a. Day 60-mortality rate of each major cause of ARDS.

Figure 4b. Day 60-mortality rate compared between the optimal cut-off value of high-resolution computed tomography (HRCT) score in each cause. Regardless of the cause, the mortality rate of a patient with a lower CT score was significantly lower than that of a patient with a higher CT score.

180x124mm (300 x 300 DPI)

Figure 5  
Receiver Operating Characteristic Curve of the prediction of  
ventilator weaning during 28 days



AUC, 0.77 (0.67-0.88); sensitivity, 75 %, specificity, 76 %

Receiver operator characteristic (ROC) curve of prediction of the ventilator weaning within 28 days from high-resolution computed tomography (HRCT) score. ROC curve identified the optimal cut-off value of 210 determined by the Youden Index for prediction of ventilator weaning at day 28 with 75 % sensitivity and 76 % specificity (AUC, 0.77; 95%CI, 0.67-0.88).

180x124mm (300 x 300 DPI)

Figure 6a.  
Receiver operating characteristics curve of the prediction  
of the onset of barotrauma

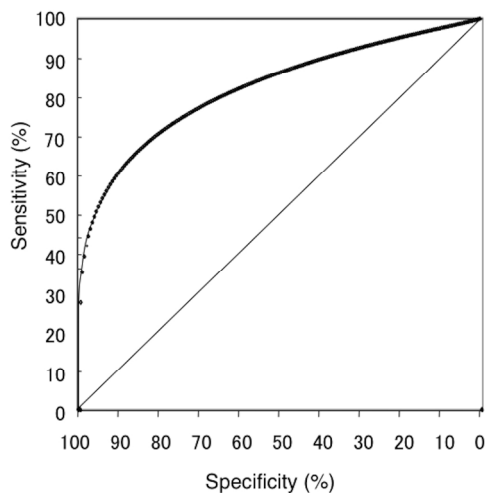

AUC, 0.77 (0.59-0.95); sensitivity, 73 %, specificity, 77 %

Figure 6b.  
Incidence of barotrauma  
Compared between the cut of value  
of CT score

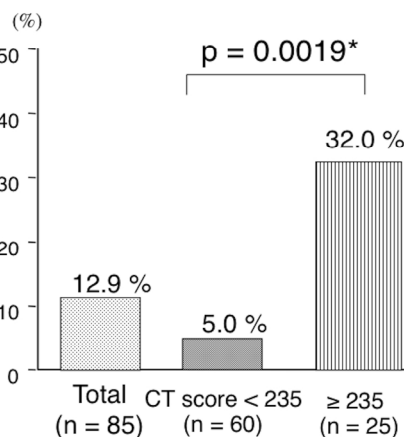

Figure 6a. Receiver operator characteristic (ROC) curve of prediction of the onset of barotrauma from high-resolution computed tomography (HRCT) score. ROC curve identified the optimal cut-off value of 235 determined by the Youden Index for prediction of barotraumias onset with 73 % sensitivity and 77 % specificity (AUC, 0.77; 95%CI, 0.59-0.95)

Figure 6b. Comparison of the incidence of barotraumias between patients with the optimal cut-off value of CT score identified from ROC curve. The incidence of barotrauma of a patient with a lower CT score was significantly lower than that of a patient with a higher CT score.

180x124mm (300 x 300 DPI)

Figure 7. Sequential changes of SOFA score



Sequential changes of Sequential Organ Failure Assessment (SOFA) scores. The SOFA score of a patient with a lower CT score (< 210) significantly decreased from day 1 to day 14 ( $p = 0.0016$ ). The SOFA score of a patient of a patient with a higher CT score ( $\geq 210$ ) significantly increased from day 1 to day 14 ( $p = 0.027$ ). Four patients with a lower CT score (< 210) and 9 patients with a higher CT score ( $\geq 210$ ) who died within 14 days were excluded.

180x134mm (300 x 300 DPI)

STROBE 2007 (v4) Statement—Checklist of items that should be included in reports of *cohort studies*

| Section/Topic                | Item # | Recommendation                                                                                                                                                                       | Reported on page # |
|------------------------------|--------|--------------------------------------------------------------------------------------------------------------------------------------------------------------------------------------|--------------------|
| Title and abstract           | 1      | (a) Indicate the study's design with a commonly used term in the title or the abstract                                                                                               | Page 4             |
|                              |        | (b) Provide in the abstract an informative and balanced summary of what was done and what was found                                                                                  | Page 4             |
| <b>Introduction</b>          |        |                                                                                                                                                                                      | <b>Page 7-8</b>    |
| Background/rationale         | 2      | Explain the scientific background and rationale for the investigation being reported                                                                                                 | Page 7-8           |
| Objectives                   | 3      | State specific objectives, including any prespecified hypotheses                                                                                                                     | Page 8             |
| <b>Methods</b>               |        |                                                                                                                                                                                      | <b>Page 8-13</b>   |
| Study design                 | 4      | Present key elements of study design early in the paper                                                                                                                              | Page 8             |
| Setting                      | 5      | Describe the setting, locations, and relevant dates, including periods of recruitment, exposure, follow-up, and data collection                                                      | Page 8, 12         |
| Participants                 | 6      | (a) Give the eligibility criteria, and the sources and methods of selection of participants. Describe methods of follow-up                                                           | Page 8             |
|                              |        | (b) For matched studies, give matching criteria and number of exposed and unexposed                                                                                                  | Page 26, Table 1   |
| Variables                    | 7      | Clearly define all outcomes, exposures, predictors, potential confounders, and effect modifiers. Give diagnostic criteria, if applicable                                             | Page 12            |
| Data sources/<br>measurement | 8*     | For each variable of interest, give sources of data and details of methods of assessment (measurement). Describe comparability of assessment methods if there is more than one group | Page 8-12          |
| Bias                         | 9      | Describe any efforts to address potential sources of bias                                                                                                                            | Page 8             |
| Study size                   | 10     | Explain how the study size was arrived at                                                                                                                                            | Page 8             |
| Quantitative variables       | 11     | Explain how quantitative variables were handled in the analyses. If applicable, describe which groupings were chosen and why                                                         | Page 8-12          |
| Statistical methods          | 12     | (a) Describe all statistical methods, including those used to control for confounding                                                                                                | Page 13            |
|                              |        | (b) Describe any methods used to examine subgroups and interactions                                                                                                                  | Page 13            |
|                              |        | (c) Explain how missing data were addressed                                                                                                                                          | Figure 1           |
|                              |        | (d) If applicable, explain how loss to follow-up was addressed                                                                                                                       | Figure 1           |
|                              |        | (e) Describe any sensitivity analyses                                                                                                                                                | Page 13            |
| <b>Results</b>               |        |                                                                                                                                                                                      | <b>Page 14-17</b>  |

|                          |     |                                                                                                                                                                                                              |                       |
|--------------------------|-----|--------------------------------------------------------------------------------------------------------------------------------------------------------------------------------------------------------------|-----------------------|
| Participants             | 13* | (a) Report numbers of individuals at each stage of study—eg numbers potentially eligible, examined for eligibility, confirmed eligible, included in the study, completing follow-up, and analysed            | Page 14, Figure 1     |
|                          |     | (b) Give reasons for non-participation at each stage                                                                                                                                                         | Page 14, Figure 1     |
|                          |     | (c) Consider use of a flow diagram                                                                                                                                                                           | Page 14, Figure 1     |
| Descriptive data         | 14* | (a) Give characteristics of study participants (eg demographic, clinical, social) and information on exposures and potential confounders                                                                     | Page 26, Table 1      |
|                          |     | (b) Indicate number of participants with missing data for each variable of interest                                                                                                                          | Figure 1              |
|                          |     | (c) Summarise follow-up time (eg, average and total amount)                                                                                                                                                  | Figure 1              |
| Outcome data             | 15* | Report numbers of outcome events or summary measures over time                                                                                                                                               | Page 29, Table 3      |
| Main results             | 16  | (a) Give unadjusted estimates and, if applicable, confounder-adjusted estimates and their precision (eg, 95% confidence interval). Make clear which confounders were adjusted for and why they were included | Page 30-32, Table 4-5 |
|                          |     | (b) Report category boundaries when continuous variables were categorized                                                                                                                                    | Page 29, Table 3      |
|                          |     | (c) If relevant, consider translating estimates of relative risk into absolute risk for a meaningful time period                                                                                             | Page 30-32, Table 4-5 |
| Other analyses           | 17  | Report other analyses done—eg analyses of subgroups and interactions, and sensitivity analyses                                                                                                               | Figure 3-7            |
| <b>Discussion</b>        |     |                                                                                                                                                                                                              | Page 18-23            |
| Key results              | 18  | Summarise key results with reference to study objectives                                                                                                                                                     | Page 3                |
| <b>Limitations</b>       |     |                                                                                                                                                                                                              | Page 21-23            |
| Interpretation           | 20  | Give a cautious overall interpretation of results considering objectives, limitations, multiplicity of analyses, results from similar studies, and other relevant evidence                                   | Page 3                |
| Generalisability         | 21  | Discuss the generalisability (external validity) of the study results                                                                                                                                        | Page 21-23            |
| <b>Other information</b> |     |                                                                                                                                                                                                              | Page 2, 24-25, 41     |
| Funding                  | 22  | Give the source of funding and the role of the funders for the present study and, if applicable, for the original study on which the present article is based                                                | Page 5                |

\*Give information separately for cases and controls in case-control studies and, if applicable, for exposed and unexposed groups in cohort and cross-sectional studies.

**Note:** An Explanation and Elaboration article discusses each checklist item and gives methodological background and published examples of transparent reporting. The STROBE checklist is best used in conjunction with this article (freely available on the Web sites of PLoS Medicine at <http://www.plosmedicine.org/>, Annals of Internal Medicine at <http://www.annals.org/>, and Epidemiology at <http://www.epidem.com/>). Information on the STROBE Initiative is available at [www.strobe-statement.org](http://www.strobe-statement.org).

1  
2  
3  
4  
5  
6 Fibroproliferative Changes on High-Resolution Computed  
7  
8 Tomography in the Acute Respiratory Distress Syndrome  
9  
10  
11 Predict Mortality and Ventilator Dependency: A Prospective  
12  
13  
14 Observational Cohort Study  
15  
16  
17  
18  
19

20 Kazuya Ichikado, MD, PhD<sup>1</sup>, Hiroyuki Muranaka, MD, PhD<sup>1</sup>,  
21 Yasuhiro Gushima, MD, PhD<sup>1</sup>, Toru Kotani, MD<sup>2</sup>, Habashi M. Nader, MD<sup>3</sup>,  
22 Kiminori Fujimoto, MD, PhD<sup>4</sup>, Takeshi Johkoh, MD, PhD<sup>5</sup>,  
23 Norihiro Iwamoto, MD, PhD<sup>1</sup>, Kodai Kawamura, MD, PhD<sup>1</sup>,  
24 , Junji Nagano, MD, PhD<sup>6</sup>, Kohichiro Fukuda, MD, PhD<sup>6</sup>, Naomi Hirata, MD, PhD<sup>7</sup>,  
25 Takeshi Yoshinaga, MD, PhD<sup>7</sup>, Hidenori Ichiyasu, MD, PhD<sup>8</sup>, Shinsuke Tsumura, MD<sup>8</sup>,  
26 Hirotsugu Kohrogi, MD, PhD<sup>8</sup>, Atsushi Kawaguchi, PhD<sup>9</sup>, Masakazu Yoshioka, MD<sup>1</sup>,  
27 Tsutomu Sakuma, MD, PhD<sup>10</sup>, Moritaka Suga, MD, PhD<sup>1</sup>  
28  
29

30 <sup>1</sup> Division of Respiratory Medicine, Saiseikai Kumamoto Hospital, 5-3-1 Chikami, Kumamoto 861-4193,  
31 Japan, <sup>2</sup> Associate professor, Department of Anesthesiology and Intensive Care Tokyo Women's Medical  
32 University, Tokyo 162-8666, Japan, <sup>3</sup> Associate professor, Multi-trauma Intensive Care Unit, R Adams  
33 Cowley Shock Trauma Center, 22S, Greene Street, Baltimore, Maryland, USA, <sup>4</sup> Associate professor,  
34 Department of Radiology, Kurume University School of Medicine and Center for Diagnostic Imaging,  
35 Kurume University Hospital, 67 Asahi-machi, Kurume, Fukuoka 830-0011, Japan, <sup>5</sup> Director, Department  
36 of Radiology, Kinki Central Hospital of Mutual Aid Association of Public Teachers, Hyogo 664-0872,  
37 Japan, <sup>6</sup> Pulmonary Division, Kumamoto City Hospital, Kumamoto 862-09, Japan, <sup>7</sup> Pulmonary Division,  
38 Kumamoto Chu-oh Hospital, Tainoshima, Kumamoto 862-0965, Japan, <sup>8</sup> Department of Respiratory  
39 Medicine, Kumamoto University Graduate School of Medical Sciences, 1-1-1 Honjo, Kumamoto City  
40 860-8556, Japan, <sup>9</sup> Biostatistics Center, Kurume University School of Medicine, Kurume, Fukuoka  
41 830-0011, Japan, <sup>10</sup> Professor of Thoracic Surgery, Kanazawa Medical University, Uchinada, Ishikawa  
42 920-0293, Japan  
43  
44  
45  
46

47 Correspondence to: K. Ichikado, MD, PhD. Chief Chest Physician, E-mail to  
48 [ichikado-k-991017@lib.bbiq.jp](mailto:ichikado-k-991017@lib.bbiq.jp) or [kazuya-ichikado@saiseikaikumamoto.jp](mailto:kazuya-ichikado@saiseikaikumamoto.jp)  
49  
50  
51  
52  
53  
54  
55  
56  
57  
58  
59  
60

1  
2  
3  
4  
5  
6  
7  
8  
9  
10  
11  
12  
13  
14  
15  
16  
17  
18  
19  
20  
21  
22  
23  
24  
25  
26  
27  
28  
29  
30  
31  
32  
33  
34  
35  
36  
37  
38  
39  
40  
41  
42  
43  
44  
45  
46  
47  
48  
49  
50  
51  
52  
53  
54  
55  
56  
57  
58  
59  
60

**Conflict of interest disclosures:** None of the authors has declared any conflict of interest related to this work.

**Keywords**

acute respiratory distress syndrome, high-resolution computed tomography, ventilator-associated lung injury, corticosteroids

For peer review only



### 1) Article Focus

- Whether the extent of fibroproliferation on high-resolution CT (HRCT) scan at the time diagnosis of ARDS would impact 60-day and 180-day mortality?
- Whether the extent of fibroproliferation on HRCT scan at the time diagnosis of ARDS would impact ventilator dependency and its associated outcomes?
- Whether the extent of fibroproliferation on HRCT scan at the time diagnosis of ARDS would impact multiple-organ failure?

### 2) Key Messages

- Pulmonary fibroproliferation assessed by HRCT in patients with early ARDS predicts increased mortality.
- Pulmonary fibroproliferation assessed by HRCT in patients with early ARDS predicts ventilator dependency and its associated outcomes (barotraumas, ventilator-associated pneumonia).
- Pulmonary fibroproliferation assessed by HRCT in patients with early ARDS increases susceptibility to multiple organ failure.

### 3) Strengths and Limitations

- The CT score is based on our previous published studies correlating HRCT findings with pathology and has been evaluated in the other diseases.
- a relatively small number of patients from a single institution
- lack of correlation with either clinical parameters or pathologic findings

1  
2  
3  
4  
5  
6 **Objectives:** To examine whether the extent of fibroproliferative changes on  
7  
8 high-resolution computed tomography (HRCT) scan influences prognosis, ventilator  
9  
10 dependency, and the associated outcomes in patients with early acute respiratory  
11  
12 distress syndrome (ARDS).  
13

14  
15  
16 **Design:** A prospective observational cohort study  
17

18  
19 **Setting:** Intensive care unit in an educational hospital  
20

21  
22 **Participants:** Eighty-five patients with ARDS who met American-European Consensus  
23  
24 Conference Criteria and eligible criteria.  
25

26  
27 **Interventions:** HRCT scans were performed and prospectively evaluated by two  
28  
29 independent observers on the day of diagnosis and graded into six findings according to  
30  
31 the extent of fibroproliferation. An overall HRCT score was obtained by previously  
32  
33 published method.  
34  
35

36  
37 **Primary and secondary outcomes:** The primary outcomes were 60-day and 180-day  
38  
39 mortality. Secondary outcomes included the number of ventilator-free days, organ  
40  
41 failure-free days, the incidence of barotraumas, and the occurrence of  
42  
43 ventilator-associated pneumonia.  
44  
45  
46

47  
48 **Results:** Higher HRCT scores were associated with statistically significant  
49  
50 decreases in organ-failure free days as well as ventilator-free days. Multivariate Cox  
51  
52 proportional hazards model showed that the HRCT score remained an independent risk  
53  
54 factor for mortality (hazard ratio 1.20; 95% confidence interval 1.06, 1.36; p = 0.005).  
55  
56  
57  
58  
59  
60

1  
2  
3  
4  
5  
6 Multivariate analysis also revealed that the CT score had predictive value for  
7  
8 ventilator-weaning within 28 days (odds ratio 0.63; 95% CI 0.48, 0.82; p = 0.0006) as  
9  
10 well as for an incidence of barotraumas (1.61; 95%CI 1.08, 2.38; p = 0.018) and for an  
11  
12 occurrence of ventilator-associated pneumonia (1.46; 95%CI 1.13,1.89; p = 0.004). An  
13  
14 HRCT score < 210 enabled prediction of 180 day survival with 71 % sensitivity and  
15  
16 76 % specificity and of ventilator-weaning failure within 28 days with 75 % sensitivity  
17  
18 and 76 % specificity.  
19  
20  
21  
22  
23

24 **Conclusions:** Pulmonary fibroproliferation assessed by HRCT in patients with early  
25  
26 ARDS predicts increased mortality with an increased susceptibility to multiple organ  
27  
28 failure, including ventilator dependency and its associated outcomes.  
29  
30  
31  
32  
33

#### 34 **Data sharing statement**

35  
36  
37 There is no additional data available.  
38  
39

#### 40 **Research grant**

41  
42  
43 This research received no specific grant from any funding agency in the public,  
44  
45 commercial or not-for-profit sectors.  
46  
47  
48  
49  
50  
51  
52  
53  
54  
55  
56  
57  
58  
59  
60

**Abbreviation list**

ARDS: acute respiratory distress syndrome

HRCT: high-resolution computed tomography

DAD: diffuse alveolar damage

APACHE II: Acute Physiology and Chronic Health Evaluation II score

SOFA score: Sequential Organ Failure Assessment score

MOF: multi-organ failure

DIC: disseminated intravascular coagulation

MDCT: multidetector-row computed tomography

PEEP: positive end-expiratory pressure

VAP: ventilator associated pneumonia

ROC: receiver-operator characteristic

AUC: area under the curve

CI: confidence interval

SD: standard deviation

## INTRODUCTION

The acute respiratory distress syndrome (ARDS) is the most severe form of a wide spectrum of pathological conditions designated as acute lung injury<sup>1,2</sup>. ARDS is considered to have an early and a late phase and is **pathologically classified** into three stages<sup>3</sup> in which an initial inflammatory injury with protein-rich edema and hemorrhage is followed by fibroproliferation, during which fibroblasts proliferate with organization and subsequent collagen deposition, resulting in lung remodeling, ultimately leading to fibrotic lung disease. The histological features of ARDS represent a poorly defined time-dependent stereotypic response to acute lung injury and are pathologically designated as diffuse alveolar damage<sup>3,4</sup>. **Although pathologic staging may be conceptually useful, commonly used clinical indicators such as PaO<sub>2</sub>/FiO<sub>2</sub> ratio correlate with progression or resolution of ARDS but necessarily reflect the extent of fibroproliferation.** Although clinicians can use pathophysiology (shunt vs. V/Q mismatch with increasing deadspace) to distinguish the transition from exudative to fibroproliferative ARDS, few features, except probably time, allow them to distinguish these pathological phases without a lung biopsy<sup>5,6</sup>.

Data regarding the significance of a fibroproliferative response on mortality risk assessed using bronchoalveolar lavage or tracheal aspirate in ARDS patients is available<sup>7-10</sup>. High-resolution computed tomographic (HRCT) findings correlate with the pathologic phases of diffuse alveolar damage<sup>12-15</sup>. Furthermore, we have previously

1  
2  
3  
4  
5  
6 reported on the prognostic value of HRCT in determining the extent of  
7  
8 fibroproliferation in ARDS patients<sup>15</sup>. Based on HRCT appearance, less  
9  
10 fibroproliferation in early ARDS was associated with greater ventilator-free days and  
11  
12 less barotraumas<sup>15</sup>. In this prospective study, **because of ARDS as a systemic disease**  
13  
14 **with systemic inflammation as core pathogenetic process that affects the lung as**  
15  
16 **well as extra-pulmonary vital organs**, we evaluated not only what was found in the  
17  
18 retrospective study<sup>15</sup> but also the relationship between early fibroproliferation and the  
19  
20 progression to multiple organ failure; whether the extent of fibroproliferation on HRCT  
21  
22 scan at the time diagnosis of ARDS would impact the susceptibility for ventilator  
23  
24 dependency and its associated complications and **on the mortality**.  
25  
26  
27  
28  
29  
30  
31

## 32 METHODS

33  
34  
35 One hundred and fifty two patients with ARDS diagnosed according to the  
36  
37 American-European Consensus Conference Criteria<sup>16</sup> were enrolled from October 1,  
38  
39 2004 to July 31, 2008 at our institution. This study was approved by an institutional  
40  
41 review board of our hospital, and informed consent was obtained from the participants  
42  
43 or their families. On the basis of the survival in our retrospective study of 44 patients<sup>15</sup>,  
44  
45  
46 we designated the number of patients more than 80 at least.  
47  
48  
49

## 50 Patients

51  
52  
53 Eligible patients were receiving mechanical ventilation by tracheal tube (n = 79)  
54  
55 or mask for non-invasive positive pressure ventilation (n = 6). Furthermore, HRCT scan  
56  
57  
58  
59  
60

1  
2  
3  
4  
5  
6 was performed on the day of diagnosis of ARDS by their consent. Exclusion criteria  
7  
8 were shown in Figure. 1. Especially, preexisting chronic interstitial lung diseases were  
9  
10 strictly excluded by history taking, imaging data available before onset of ARDS, and  
11  
12 the presence of coarse reticulation and honeycombing on HRCT scans suggesting of  
13  
14 chronic pulmonary fibrosis. Furthermore, the other preexisting pulmonary disease such  
15  
16 as pulmonary emphysema was documented from review of radiological reports.  
17  
18  
19

20  
21 Information about our patients' severity and characteristics is reported in Table 1.  
22  
23

#### 24 **HRCT examination, assessment, and scoring**

25  
26 All patients underwent whole lung volumetric HRCT scanning of the chest on the day  
27  
28 of diagnosis of ARDS using a multidetector-row CT (MDCT) scan. All MDCT scans  
29  
30 were obtained with 2-mm thickness and 15-mm table speed per rotation and were  
31  
32 performed at full inspiration from the lung apex to base. Contiguous CT slices were  
33  
34 reconstructed using of a high-spatial frequency algorithm. Sections were displayed at  
35  
36 10-mm intervals throughout the chest with the patient in the supine position and without  
37  
38 intravenous contrast medium. The process did not negatively affect the patients'  
39  
40 condition. In this study, we evaluated single CT scan acquired at day one of the ARDS  
41  
42 diagnosis, because sequential CT scans were hard to be performed after high positive  
43  
44 end-expiratory pressure ventilation was introduced. HRCT scans were evaluated on the  
45  
46 day of ARDS diagnosis by two independent observers (**K.Fujimoto. and T.J.**) who  
47  
48  
49  
50  
51  
52  
53  
54  
55  
56  
57  
58  
59  
60 **were chest radiologists with 23 and 20 years of experience, respectively, and were**

1  
2  
3  
4  
5  
6 **unaware of patient condition.** The presence and extent of areas of ground-glass  
7  
8 attenuation, air-space consolidation, traction bronchiectasis, traction bronchiolectasis,  
9  
10 and honeycombing were assessed. Ground-glass attenuation was defined as a hazy area  
11  
12 with increased opacification without obscuration of underlying vascular markings.  
13  
14 Air-space consolidation was considered present when the vascular markings were  
15  
16 obscured. When bronchi were irregular in contour, the dilated bronchus within areas of  
17  
18 parenchymal abnormality was recognized as traction bronchiectasis. Traction  
19  
20 bronchiolectasis was identified by the presence of dilated bronchioles within areas with  
21  
22 parenchymal abnormality. Honeycombing was defined as the presence of cystic  
23  
24 airspaces measuring 2-10 mm in diameter with well-defined walls.  
25  
26  
27  
28  
29  
30  
31

32 HRCT findings were graded on a scale of 1-6 based on the classification  
33  
34 system correlating with previously described pathology (Fig. 2)<sup>13,15</sup>: 1, normal  
35  
36 attenuation; 2, ground-glass attenuation; 3, consolidation; 4, ground-glass attenuation  
37  
38 with traction bronchiolectasis or bronchiectasis; 5, consolidation with traction  
39  
40 bronchiolectasis or bronchiectasis; 6, honeycombing. The presence of each of these six  
41  
42 abnormalities was assessed independently in three (upper, middle, lower) zones of each  
43  
44 lung. The upper zone was defined as the area above the level of the carina, the middle  
45  
46 zone as the area between the level of the carina and that of the infrapulmonary vein, and  
47  
48 the lower zone as the area below the level of the infrapulmonary vein. The extent of  
49  
50 each abnormality was determined by visually estimating the percentage (to the nearest  
51  
52  
53  
54  
55  
56  
57  
58  
59  
60



1  
2  
3  
4  
5  
6 10%) of the affected lung parenchyma in each zone. The assessments of the two  
7  
8  
9 observers were averaged. The abnormality score for each zone was calculated by  
10  
11 multiplying the percentage area by the point value (1-6). The six zone scores were  
12  
13 averaged to determine the total score for each abnormality in each patient. The overall  
14  
15 CT score for each patient was obtained by adding the six averaged scores. The scoring  
16  
17 system is previously reported<sup>13,15</sup> and has been evaluated in the other diseases<sup>17,18</sup>.

### 21 **Treatment Protocol**

22  
23 All patients underwent a common intensive treatment according to the  
24  
25 domestic clinical practical guidelines<sup>19-23</sup>. Antibiotic therapy was performed by these  
26  
27 guidelines, which were referenced to the American Thoracic Society/Infectious  
28  
29 Diseases Society of America Consensus Guidelines **on the management of**  
30  
31 **community-acquired pneumonia in immunocompetent adults.**<sup>24,25</sup>

32  
33 **While there is contracting reports for a survival benefit, all randomized**  
34  
35 **trials have shown a significant reduction in duration of mechanical ventilation**<sup>26-29</sup>.  
36  
37 When this study protocol was made, the efficacy of prolonged corticosteroids to the  
38  
39 fibroproliferative ARDS had been reported in a small randomized control study<sup>30</sup>. In the  
40  
41 current study, we examined the relationship between the efficacy of steroids and the  
42  
43 extent of fibroproliferation on HRCT scans. **According to our previous study**<sup>15</sup>, **early**  
44  
45 **fibroproliferation on HRCT scans was observed in 64 % of 44 patients with ARDS.**  
46  
47 **Therefore, we started corticosteroid therapy after performing HRCT scans at the**  
48  
49  
50  
51  
52  
53  
54  
55  
56  
57  
58  
59  
60

1  
2  
3  
4  
5  
6 **diagnosis of ARDS. Initial administration of methylprednisolone with a moderate**  
7  
8 **dose (2 mg/kg/day) (n = 71) or high-dose (1000 mg/day for three days followed by a**  
9  
10 **moderate dose) (n = 14) was introduced and was gradually tapered over one month**  
11  
12 **according to the previous study<sup>30</sup>. Ventilator management and ventilator weaning was**  
13  
14 introduced by the evidence-based guidelines<sup>22, 23</sup> with reference to the lower tidal  
15  
16 volume ( $V_T$ ) strategy (6 ml/kg predicted body weight (PBW)  $< V_T < 10$  ml/kg PBW) in  
17  
18 the ARDS Clinical Trial<sup>31</sup> and to the guidelines for weaning and discontinuing  
19  
20 ventilatory support from the American College of Chest Physicians<sup>32</sup>.  
21  
22  
23  
24  
25

### 26 27 **Screening of ventilator associated outcomes**

28  
29 For each patient, we recorded the number of ventilator-free days. Barotrauma,  
30  
31 defined as any new pneumothorax, pneumomediastinum, or subcutaneous emphysema,  
32  
33 was noted as present or absent on routine chest radiographs or chest tube insertions for  
34  
35 known or suspected spontaneous pneumothorax during the first 28 days<sup>33</sup>.  
36  
37  
38  
39

40 Ventilator associated pneumonia (VAP) surveillance was incorporated into the  
41  
42 routine examinations of cultures of sputum obtained using a sterile intratracheal suction  
43  
44 tube<sup>34</sup>. VAP was defined as pneumonia occurring after more than 48 hours of  
45  
46 mechanical ventilation and for up to 72 hours after weaning.  
47  
48  
49

### 50 51 **Organ or system failure**

52  
53 Patients were monitored daily for 28 days for signs of the failure of  
54  
55 extrapulmonary organs and systems according to the ARDS Clinical Trial<sup>31</sup>. The  
56  
57  
58  
59  
60

1  
2  
3  
4  
5  
6 number of days without organ or system failure was calculated by subtracting the  
7  
8 number of days with organ failure from the lesser of 28 days or the number of days to  
9  
10 death. The Sequential Organ Failure Assessment (SOFA) score was sequentially  
11  
12 monitored at Day 7 and 14, except for patients who died within 7 days or 14 days.  
13  
14

### 15 16 **Outcome measurements**

17  
18 The primary outcome was mortality 60 days and 180 days after ARDS diagnosis.  
19  
20 Patients discharged from the hospital while alive for 60 days and 180 days were defined  
21  
22 as survivors. Non-survivors were defined as patients who died in the hospital.  
23  
24 Secondary outcome variables included the number of ventilator-free days, organ  
25  
26 failure-free days, the incidence of barotraumas, and the occurrence of  
27  
28 ventilator-associated pneumonia.  
29  
30  
31  
32  
33  
34

### 35 36 **Statistical analysis**

37  
38 Cox proportional hazards regression analysis was used to examine the influence on  
39  
40 survival of 10 % change of radiologically fibroproliferation on HRCT while adjusting  
41  
42 for other prognostic clinical factors such as age, severity of illness, non-pulmonary  
43  
44 organ dysfunctions, that had been reported<sup>35-37</sup>. Multivariate regression analysis was  
45  
46 also performed to assess the impact on ventilator-weaning failure within 28 days, an  
47  
48 incidence of barotraumas, and ventilator-associated pneumonia. To analyze the CT  
49  
50 score as a predictor of survival, or of the failure of ventilator weaning or of the  
51  
52 occurrence of barotrauma within 28 days after the onset of ARDS, we used  
53  
54  
55  
56  
57  
58  
59  
60

1  
2  
3  
4  
5  
6 receiver-operator characteristic (ROC) curves and the corresponding area under the  
7  
8  
9 curve (AUC) to evaluate how the prediction model performed on the test data and to  
10  
11 determine the cutoff value of the CT score yielding the highest sensitivity and  
12  
13 specificity which were determined by the Youden index (i.e., sensitivity + specificity –  
14  
15 1). Statistical analyses were performed by using the SPSS package (version 18.0J; SPSS,  
16  
17 Tokyo, Japan). For all statistical analyses,  $p < 0.05$  was considered significant.  
18  
19  
20  
21  
22  
23  
24  
25  
26  
27  
28  
29  
30  
31  
32  
33  
34  
35  
36  
37  
38  
39  
40  
41  
42  
43  
44  
45  
46  
47  
48  
49  
50  
51  
52  
53  
54  
55  
56  
57  
58  
59  
60

## RESULTS

### Baseline clinical characteristics

Non-survivors had more severe lung injury with fibroproliferative changes on HRCT scan as shown by their higher HRCT scores than survivors, although non-survivors tended to have less severe multiorgan failure as expressed by their **lower SOFA** scores. No significant differences were seen between survivors and non-survivors in the number of a history of cigarette smoking and a presence of emphysema. No significant differences were also observed in **the ventilatory and medicational conditions** as well (Table 1).

### HRCT findings for survivors and non-survivors

The area of increased attenuation associated with traction bronchiolectasis or bronchiectasis, indicative of radiologically fibroproliferation, was observed in 40 (47%) of 85 patients at presentation and was significantly smaller in survivors than in non-survivors (Table 2), whereas the area of increased attenuation without traction bronchiolectasis or bronchiectasis was greater in survivors than in non-survivors. Interobserver variability in evaluation of the presence of lung abnormalities was good (kappa, 0.63-0.83), and the assessments of the extent of abnormality by two different observers also correlated well (Spearman rank correlation coefficient, 0.72;  $p < 0.01$ ).

### Prognostic value of the HRCT score

The overall HRCT score of survivors (median  $\pm$  SD, 195.7  $\pm$  53.7; range,

1  
2  
3  
4  
5  
6 133.4-325.0) was significantly smaller than that of non-survivors ( $233.1 \pm 46.2$ ;  
7  
8 174.8-384.8). Construction of a ROC curve yielded an optimal cut-off value of the  
9  
10 HRCT score of 210 which was determined for prediction of survival at Day 60 with  
11  
12 71 % sensitivity of and 72 % specificity (AUC, 0.71; 95% confidence interval (CI),  
13  
14 0.61-0.82) and for prediction of survival at Day 180 with 71 % sensitivity and 76 %  
15  
16 specificity (AUC, 0.73; 95% CI, 0.62-0.84) (Fig. 3). A significant difference was  
17  
18 observed in the 60-day mortality rate between patients with CT score < 210 and those  
19  
20 with CT score  $\geq$  210 ( $p < 0.0001$ ) as well as in the ventilator-free days at day 28 ( $p <$   
21  
22 0.0001) (Table 3). The difference in the 60-day mortality rate between patients with  
23  
24 more or less fibroproliferative changes on HRCT scan persisted regardless of causes of  
25  
26 ARDS (Fig. 4). Multivariate Cox proportional hazards model with adjustment for  
27  
28 demographic characteristics, severity of illness, non-pulmonary organ dysfunctions, and  
29  
30 HRCT score at diagnosis, the HRCT score remained an independent risk factor for  
31  
32 mortality (hazard ratio 1.20; 95% confidence interval 1.06, 1.36;  $p = 0.005$ ) when  
33  
34 expressed as mortality change per 10% increase in the area of attenuation with traction  
35  
36 bronchiolectasis or bronchiectasis on HRCT scans (Table 4).  
37  
38  
39  
40  
41  
42  
43  
44  
45  
46  
47

48 **Relation between the HRCT score and the number of ventilator-free days, and the**  
49 **number of organ-failure-free days and sequential changes of SOFA score**  
50

51 An ROC curve determined the best cut-off value of the CT score of 210 for  
52  
53 prediction of ventilator-weaning failure within 28 days with 75 % sensitivity and 76 %  
54  
55  
56  
57  
58  
59  
60

1  
2  
3  
4  
5  
6 specificity (AUC, 0.77; 95% CI, 0.67-0.88) (Fig. 5a). Regardless of significantly higher  
7  
8 SOFA score ( $8.0 \pm 3.0$  versus  $5.0 \pm 2.0$ ;  $p < 0.0001$ ) and higher DIC score ( $2.8 \pm 1.5$   
9  
10 versus  $1.9 \pm 1.8$ ;  $p < 0.002$ ) at diagnosis, patients with a CT score of  $< 210$  had a  
11  
12 significantly higher number of ventilator-free days ( $14.0 \pm 7.8$  versus  $5.2 \pm 8.0$  days;  $p <$   
13  
14  $0.0001$ ). Those patients with a lower CT score were associated with less severe  
15  
16 subsequent multiorgan failure as shown by a significantly higher number of  
17  
18 organ-failure-free days (Table 3) and by significant decrease of sequential SOFA score  
19  
20 than that of patients with a higher CT score (Fig.7). Multivariate regression analysis,  
21  
22 with adjustment for demographic characteristics, general severity, and occurrence of  
23  
24 barotraumas, showed that the CT score was independently associated with  
25  
26 ventilator-weaning within 28 days with an odds ratio of 0.63 when expressed as  
27  
28 weaning failure change per 10% increase in the area of attenuation with traction  
29  
30 bronchiolectasis or bronchiectasis on HRCT scans ( $p = 0.0006$ ) (Table 5a).  
31  
32  
33  
34  
35  
36  
37  
38  
39

#### 40 **Relation between the HRCT score and the incidence of barotraumas or** 41 42 **ventilator-associated pneumonia** 43 44

45 All eleven patients with barotrauma had pneumothorax. Barotrauma occurred  
46  
47 3-28 days (mean  $\pm$  SD,  $12.7 \pm 9.4$  days) after ARDS onset. An ROC curve identified the  
48  
49 optimal cutoff value of the CT score of 235 for prediction of barotrauma onset with  
50  
51 73 % sensitivity and 77 % specificity (AUC, 0.77; 95% CI, 0.59-0.95) (Fig. 6a).  
52  
53  
54  
55  
56 Patients with the CT score  $< 235$  had a significantly lower incidence of barotrauma (5.0  
57  
58  
59  
60

1  
2  
3  
4  
5  
6 versus 32.0 %;  $p = 0.0019$ ) within 28 days after the onset of ARDS than those with CT  
7  
8 score of  $\geq 235$  (Fig. 5b). The CT score was also independently associated with the  
9  
10 occurrence of barotraumas with an odds ratio of 1.61 by multivariate regression analysis  
11  
12 ( $p = 0.018$ ) (Table 6b). Ventilator-associated pneumonia (VAP) was documented in 36  
13  
14 patients (42.3%) after day 5 since ARDS onset. The percentage of patients complicated  
15  
16 with VAP in the higher CT score group tended to be higher than those in the lower CT  
17  
18 score groups (51.4 and 35.4 percent, respectively;  $p = 0.14$ ). Multivariate analysis also  
19  
20 demonstrated that the CT score was independently associated with the complication of  
21  
22 VAP with an odds ratio of 1.46 ( $p = 0.0041$ ) (Table 5c).  
23  
24  
25  
26  
27  
28  
29  
30  
31  
32  
33  
34  
35  
36  
37  
38  
39  
40  
41  
42  
43  
44  
45  
46  
47  
48  
49  
50  
51  
52  
53  
54  
55  
56  
57  
58  
59  
60



## DISCUSSION

Regardless of the cause of ARDS, we found the extent of fibroproliferative changes on HRCT at diagnosis of ARDS was an independent predictive factor for survival and ventilator dependency. Furthermore, patients with extensive fibroproliferative changes on HRCT scan were more susceptible to associated multiorgan failure, barotraumas and ventilator-associated pneumonia than those with less extensive changes.

Semi-quantitative determination of fibroproliferation by means of HRCT assessment was informative with regard to the potential not only for response to treatment but also for susceptibility to subsequent ventilator-associated outcomes (ventilator dependency, barotraumas, and ventilator-associated pneumonia).

Biochemical evidence of fibroproliferation is present early in the acute lung injury process. N-terminal procollagen peptide III (N-PCP-III) is a marker of collagen turnover and is elevated in bronchoalveolar lavage (BAL) fluid and tracheal aspirate from ARDS patients within 24 h of diagnosis<sup>7-10</sup>. The increased N-PCP-III concentration in BALF at diagnosis was associated with poor prognosis, suggesting that pulmonary early fibroproliferation is an important determinant of outcome<sup>7-10</sup>. In the present study, traction bronchiectasis within areas of increased attenuation, suggesting radiologically fibroproliferation, was already detectable on HRCT scans obtained on the day of ARDS onset in 40 patients (47%). **We also confirmed that HRCT findings of early and late phase of ARDS frequently overlapped.** These results supported the

1  
2  
3  
4  
5  
6 previous reports and suggested that a clinically early time point does not necessarily  
7  
8 correspond to a pathologically early phase of ARDS. Given that no significant  
9  
10 difference in the cause of ARDS was apparent between the survivors and non-survivors  
11  
12 in this study, no correlation between the HRCT score and the clinical duration of ARDS  
13  
14 may also be attributable to differences in individual sensitivity to lung injury and in the  
15  
16 intensity of the consequent exaggerated inflammation that occurs between the onset of  
17  
18 injury and progression to ARDS. The term “fibroproliferative” ARDS may not  
19  
20 necessarily apply only to “late phase” ARDS but possibly also to “early phase”.  
21  
22 Accordingly, extent of fibroproliferative changes on HRCT scan, together with  
23  
24 N-PCP-III concentration in BALF, may be a potential clue to differentiate “real” late  
25  
26 ARDS from the early one.  
27  
28  
29  
30  
31  
32  
33  
34

35 Currently, there have been few prospective clinical studies to validate the  
36  
37 susceptibility to ventilator-associated outcomes. The ARDS Network low tidal  
38  
39 volume study has suggested that excessive large tidal ventilation induces  
40  
41 inflammatory cytokines and is associated with a known risk factor for ventilator  
42  
43 associated lung injury<sup>27</sup>. In the present study, patients with extensive  
44  
45 fibroproliferation shown as higher HRCT score on the day of ARDS onset needed a  
46  
47 longer duration of mechanical ventilation with subsequent ventilator-associated  
48  
49 pneumonia and had shorter organ-failure free days, and subsequently suffered from  
50  
51 multiple organ failure.  
52  
53  
54  
55  
56  
57  
58  
59  
60

1  
2  
3  
4  
5  
6 Barotraumas occurring in critically ill patients independently affects intensive care  
7  
8 unit mortality<sup>38</sup>. Barotrauma events occur late in the course of ARDS and are related to  
9  
10 lung structural changes such as cystic or fibroproliferative lesions that develop over  
11  
12 time<sup>39</sup>. In our study, barotrauma occurred more than 10 days (mean  $\pm$  SD, 12.7  $\pm$  9.4  
13  
14 days) after the onset of ARDS and was more frequent in patients with a higher HRCT  
15  
16 score (score  $\geq$  235) than in those with a lower HRCT score (score  $<$  235) during the first  
17  
18 28 days. Given that a higher HRCT score at diagnosis suggests advanced  
19  
20 fibroproliferation, our data support the relationship between pulmonary  
21  
22 fibroproliferation and its susceptibility to barotraumas.  
23  
24  
25  
26  
27  
28  
29

30 Ventilator-associated pneumonia (VAP) has been a causative factor of subsequent  
31  
32 systemic inflammatory syndrome resulting in multi-organ failure<sup>33</sup>. The risk of VAP  
33  
34 increases with prolonged mechanical ventilation<sup>34</sup>. **Furthermore, sustained and**  
35  
36 **intense inflammatory responses in unresolving ARDS increase the bi-directional**  
37  
38 **effects on bacterial growth**<sup>40</sup>. More extensive fibroproliferative changes on HRCT  
39  
40 scan shown as a higher CT score were associated with a longer ventilator dependency  
41  
42 that was more susceptible to VAP onset. These results support that pulmonary  
43  
44 fibroproliferation of ARDS increases risk for ventilator dependency and its associated  
45  
46 complications.  
47  
48  
49  
50  
51  
52

53 In a previous study of 45 cases of ARDS confirmed at biopsy, patients whose  
54  
55 conditions were shown histologically to be in the acute exudative phase had a better  
56  
57  
58  
59  
60

1  
2  
3  
4  
5  
6 prognosis than did those whose condition was shown to be in the fibroproliferative  
7  
8 phases<sup>41</sup>. **Persistent dysregulated systemic inflammation leading to maladaptive**  
9  
10 **lung repair results in pulmonary fibroproliferation and progression of**  
11  
12 **extrapulmonary organ dysfunction**<sup>29</sup>. **Prolonged corticosteroid therapy attenuates**  
13  
14 **systemic inflammation and reduced duration of mechanical ventilation**<sup>29</sup>. In our  
15  
16 study, the group of patients who had less fibroproliferative changes on HRCT scans  
17  
18 (HRCT score, < 210) showed lower mortality and more ventilator-free days than those  
19  
20 who had more extensive areas of fibroproliferation (HRCT score, ≥ 210). This may  
21  
22 suggest a relationship between the pathologic phases of ARDS and responsiveness to  
23  
24 treatment. **More extensive and rapidly progressive pulmonary fibroproliferation**  
25  
26 **resulting from intense exaggerated systemic inflammation at presentation occurs,**  
27  
28 **less effective even prolonged corticosteroid therapy may be.** Whether the patients  
29  
30 with fibroproliferative predominance have different treatment strategies compared to  
31  
32 those with exudative predominance has been a vexing question<sup>4</sup>. Improving our  
33  
34 understanding of disease state and evolution of the disease may be key to the  
35  
36 development of the optimal therapy and their timing. A method that could be used to  
37  
38 evaluate and calibrate the clinical to pathologic stages may help prognosticate, alter  
39  
40 supportive or therapeutic approach to ARDS such as ventilator management and define  
41  
42 the treatment window for those interventions. Further prospective studies are needed to  
43  
44 examine the efficacy of the drugs such as corticosteroids according to the extent of  
45  
46  
47  
48  
49  
50  
51  
52  
53  
54  
55  
56  
57  
58  
59  
60

1  
2  
3  
4  
5  
6 fibroproliferation on HRCT scans.  
7

8  
9       There were some potential limitations. First, our study included few patients with  
10  
11 ARDS caused by major trauma, multiple transfusion and others, although it included  
12  
13 approximately 90% of the patients who had ARDS caused by three major etiologies  
14  
15 (pneumonia, aspiration, sepsis) of ARDS; thus, our study may not sufficiently reflect all  
16  
17 forms of ARDS. However, previous large randomized control studies also included  
18  
19 more than 70% of patients with these three etiologies<sup>26,31</sup>. Therefore, our results may  
20  
21 be applicable to most forms of ARDS.  
22  
23  
24  
25

26  
27       Second, many elderly patients (mean age, 75.0 years) were included. Clinically,  
28  
29 elderly ARDS patients show higher morbidity and need longer duration of mechanical  
30  
31 ventilation with subsequent poorer prognosis than the younger patients<sup>2,37</sup>. The  
32  
33 age-related differences in mortality and outcomes have been considered to be due to the  
34  
35 greater number of comorbid illness and higher frequency of non-pulmonary organ  
36  
37 system failure in older patients<sup>37</sup>. In this study, preexisting pulmonary emphysema was  
38  
39 seen in 32 (38 %) of 85 patients. Although no significant differences were seen between  
40  
41 survivors and non-survivors in the number of a history of cigarette smoking and a  
42  
43 presence of emphysema, we could not evaluate the severity of emphysema before the  
44  
45 onset of ARDS. Such a smoking-induced chronic lung disease could potentially affect  
46  
47 ventilator-dependency or prognosis. Although it was problematic whether aging  
48  
49 increase susceptibility to lung injury and to pulmonary fibroproliferation, further  
50  
51  
52  
53  
54  
55  
56  
57  
58  
59  
60

1  
2  
3  
4  
5  
6 investigation of younger patients with ARDS is needed to confirm the consistency of  
7  
8 the results of our study.  
9

10  
11 Third, no correlation was provided with either clinical parameters or pathologic  
12  
13 findings in the present study. Further investigation is necessary to compare HRCT  
14  
15 findings with other predictors of morbidity/mortality-i.e. inflammatory biomarkers such  
16  
17 as serum IL-6 or BAL PCP III levels. Recent studies of biopsy findings from ARDS  
18  
19 patients have reported the pathologic diversity and only half proportion of typical  
20  
21 diffuse alveolar damage<sup>5,6</sup>. Regardless of the cause or pathology of ARDS, our study  
22  
23 highlighted the extent of lung architectural distortion (areas with traction  
24  
25 bronchiectasis) indicating that pulmonary fibroproliferation on HRCT scans. Although  
26  
27 fibroproliferative ARDS does not warrant different treatment strategies up to the present,  
28  
29 prospective evaluation of HRCT findings in patients with ARDS would help therapeutic  
30  
31 implications in the development of treatment strategies based on the extent of  
32  
33 fibroproliferation, as well as its prognostic implications.  
34  
35  
36  
37  
38  
39  
40  
41  
42

43 **Fourth, when using our cutoff values of HRCT scores, there were**  
44  
45 **approximately 25 % of our patients who did not fit for prediction of poor**  
46  
47 **prognosis or ventilator dependency. Recently, multiple organ failure in ARDS**  
48  
49 **patients is considered to be either as the predisposing condition or as a**  
50  
51 **consequence of ARDS<sup>42</sup>. If ARDS occurs as one of multiple organ failure, even**  
52  
53 **though pulmonary fibroproliferation was mild, extra-pulmonary dysfunction**  
54  
55  
56  
57  
58  
59  
60

1  
2  
3  
4  
5  
6 **could be the determinant of the outcome.**  
7

8  
9       On the basis of our results, extensive HRCT abnormalities indicative of  
10  
11 fibroproliferative changes on the day of ARDS diagnosis were independently predictive  
12  
13 of poor prognosis and prolonged mechanical ventilation, and were also associated with  
14  
15 subsequent multiple organ failure. Pulmonary fibroproliferation that occurs early in  
16  
17 ARDS patients increases mortality risk by increasing susceptibility to ventilator  
18  
19 dependency and its associated complications.  
20  
21  
22  
23  
24  
25  
26  
27  
28  
29  
30  
31  
32  
33  
34  
35  
36  
37  
38  
39  
40  
41  
42  
43  
44  
45  
46  
47  
48  
49  
50  
51  
52  
53  
54  
55  
56  
57  
58  
59  
60

## ACKNOWLEDGEMENTS

**Author contributions:** Dr Suga takes full responsibility for the integrity of all the data and the accuracy of the data analysis.

Dr Ichikado: contributed to designing the study, collecting the data, analyzing the data, and writing the manuscript.

Dr Muranaka: contributed to collecting data, analyzing the data, and revising the manuscript.

Dr Gushima: contributed to collecting data, analyzing the data, and revising the manuscript.

Dr Kotani: contributed to analyzing the data and revising the manuscript.

Dr Habashi: contributed to reanalyzing the data and revising the manuscript.

Dr Fujimoto: contributed to reanalyzing the data and revising the manuscript.

Dr Johkoh: contributed to reanalyzing the data and revising the manuscript.

Dr Iwamoto: contributed to collecting the data and revising the manuscript.

Dr Kawamura: contributed to collecting the data and revising the manuscript.

Dr Nagano: contributed to collecting the data and revising the manuscript.

Dr Fukuda: contributed to collecting the data and revising the manuscript.

Dr Hirata: contributed to collecting the data and revising the manuscript.

Dr Yoshinaga: contributed to reanalyzing the data and revising the manuscript.

Dr Ichiyasu: contributed to collecting the data and revising the manuscript.

Dr Tsumura: contributed to collecting the data and revising the manuscript.

Dr Kohrogi: contributed to reanalyzing the data and revising the manuscript.

Dr Kawaguchi: contributed to reanalyzing the data and revising the manuscript.

Dr Yoshioka: contributed to reanalyzing the data and revising the manuscript.

Dr Sakuma: contributed to reanalyzing the data and revising the manuscript.

**Other persons contributing to this study:** We appreciate Michael A. Matthay, MD<sup>1</sup>, and

Hiroshi Kubo, MD, PhD<sup>2</sup> for their editorial assistance and also thank Isamu Cho, MD, PhD<sup>3</sup>,

Tomoki Tanaka, MD<sup>3</sup>, Junichi Maehara, MD<sup>4</sup>, Shigeo Hiroshige, MD<sup>5</sup>, Makoto Takaki, MD<sup>5</sup>,

Mitsuko Honda, MD<sup>5</sup>, Naoko Arakawa, MD<sup>5</sup>, Yuko Yasuda, MD<sup>5</sup>, Makiko Takeguchi, MD<sup>5</sup>,

Aoi Teruya, MD<sup>5</sup>, Yoshitomo Eguchi, MD<sup>5</sup>, Naoki Shingu, MD<sup>5</sup>, and Yoshihiko Sakata, MD<sup>5</sup>

for their clinical assistance.

1) Departments of Medicine and Anesthesia, University of California, San Francisco, CA, USA

2) Department of Geriatric and Respiratory Medicine, Tohoku University School of Medicine, Tohoku



1  
2  
3  
4  
5  
6 University, Sendai City, Miyagi, Japan  
7

8 3) Department of Emergency and Critical Care Medicine, Saiseikai Kumamoto Hospital, Kumamoto,  
9 Japan  
10

11 4) Pulmonary Division, Kumamoto City Hospital, Kumamoto City, Japan  
12

13 5) Division of Respiratory Medicine, Saiseikai Kumamoto Hospital, Kumamoto, Japan  
14  
15  
16  
17  
18  
19  
20  
21  
22  
23  
24  
25  
26  
27  
28  
29  
30  
31  
32  
33  
34  
35  
36  
37  
38  
39  
40  
41  
42  
43  
44  
45  
46  
47  
48  
49  
50  
51  
52  
53  
54  
55  
56  
57  
58  
59  
60

For peer review only

**Table 1.** Clinical characteristics of patients on the day of ARDS onset

| Characteristic                                   | Total<br>(n = 85) | 60 days               |                                       | p value |
|--------------------------------------------------|-------------------|-----------------------|---------------------------------------|---------|
|                                                  |                   | Survivors<br>(n = 54) | Outcomes<br>Non-survivors<br>(n = 31) |         |
| Age (years)*                                     | 75 ± 10           | 75 ± 11               | 76 ± 10                               | 0.60    |
| Sex (M/F)                                        | 51/34             | 30/24                 | 21/10                                 | 0.38    |
| Cigarette smoking                                | 33                | 17                    | 16                                    | 0.11    |
| Presence of emphysema                            | 32                | 18                    | 14                                    | 0.39    |
| Liver cirrhosis (%)                              | 6 (7.1)           | 4 (7.4)               | 2 (6.5)                               | > 0.99  |
| Direct/indirect injury                           | 59/26             | 38/16                 | 21/10                                 | 0.81    |
| PaO <sub>2</sub> :FiO <sub>2</sub>               | 96.2 ± 45.6       | 96.5 ± 45.0           | 96.2 ± 47.5                           | 0.90    |
| Causes of lung injury                            |                   |                       |                                       |         |
| Pneumonia (%)                                    | 32 (37.6)         | 20                    | 12                                    | > 0.99  |
| Sepsis (%)                                       | 24 (28.2)         | 13                    | 11                                    | 0.38    |
| Pulmonary (%)                                    | 11 (12.9)         | 5                     | 6                                     | 0.20    |
| Extrapulmonary (%)                               | 13 (15.2)         | 8                     | 5                                     | > 0.99  |
| Aspiration (%)                                   | 22 (25.9)         | 16                    | 6                                     | 0.44    |
| Others (%)                                       | 7 (8.2)           | 5                     | 2                                     | > 0.99  |
| Lung injury score*                               | 3.2 ± 0.5         | 3.3 ± 0.5             | 3.3 ± 0.5                             | 0.88    |
| APACHE II score                                  | 21.0 ± 4.7        | 21.0 ± 4.6            | 22.0 ± 4.9                            | 0.76    |
| SOFA score                                       | 7.0 ± 2.8         | 7.0 ± 2.8             | 6.0 ± 2.9                             | 0.15    |
| McCabe score (1/2/3)                             | 78/5/2            | 49/4/1                | 29/1/1                                | > 0.99  |
| DIC score*#                                      | 2.4 ± 1.7         | 2.4 ± 1.7             | 2.5 ± 1.6                             | 0.68    |
| White blood cell count<br>(per mm <sup>3</sup> ) | 10600 ± 6788      | 10600 ± 6178          | 10600 ± 7839                          | 0.63    |

|                                              |             |             |             |        |
|----------------------------------------------|-------------|-------------|-------------|--------|
| C-reactive protein (CRP)<br>(mg/dl)          | 15.4 ± 10.3 | 15.4 ± 9.6  | 16.1 ± 11.5 | 0.69   |
| Albumin (g/dl)                               | 3.0 ± 0.5   | 3.1 ± 0.5   | 2.8 ± 0.5   | 0.11   |
| Lactate dehydrogenase<br>(LDH) (IU/L)        | 308 ± 185   | 301 ± 147   | 339 ± 235   | 0.29   |
| Platelet count (per mm <sup>3</sup> )        | 20.1 ± 10.7 | 20.7 ± 11.0 | 18.9 ± 10.3 | 0.94   |
| Days of CT scanning<br>from ARDS onset (day) | 1.0 ± 0.0   | 1.0 ± 0.0   | 1.0 ± 0.0   | > 0.99 |
| HRCT score #                                 | 207 ± 53    | 196 ± 54    | 233 ± 46    | 0.001  |
| Initial steroid therapy                      |             |             |             |        |
| High dose                                    | 14          | 7           | 7           | 0.36   |
| Low dose                                     | 71          | 47          | 24          | 0.36   |
| Ventilatory variables                        |             |             |             |        |
| Tidal volume, ml/kg<br>predicted body weight | 8.0 ± 0.8   | 8.0 ± 0.7   | 8.0 ± 0.9   | 0.54   |
| Plateau pressure, cmH <sub>2</sub> O         | 21.5 ± 4.2  | 21.0 ± 3.8  | 23.0 ± 4.7  | 0.34   |
| Initial PEEP, cmH <sub>2</sub> O             | 8.0 ± 3.4   | 8.0 ± 2.5   | 8.0 ± 4.3   | 0.18   |

Data are expressed as median ± standard deviation. \*Data are mean ± standard

deviation. The p values refer to comparisons between survivors and non-survivors.

# Score ≥ 4 defined as disseminated intravascular coagulation from scoring system for

The Japanese Association for Acute Medicine.

**Table 2.** Extent of each high-resolution CT finding in 60-days survivors and non-survivors of ARDS.

| CT Finding                                                                   | Survivors<br>(n = 54) | Non-survivors<br>(n = 31) | p value |
|------------------------------------------------------------------------------|-----------------------|---------------------------|---------|
| Spared area                                                                  | 37.0 ± 19.2           | 30.3 ± 14.9               | 0.15    |
| Ground-glass attenuation                                                     | 33.5 ± 22.9           | 30.0 ± 16.0               | 0.70    |
| Air-space consolidation                                                      | 17.5 ± 13.8           | 18.3 ± 19.3               | 0.72    |
| Total area without traction bronchiolectasis<br>or bronchiectasis            | 88.0 ± 22.0           | 78.2 ± 22.5               | 0.01    |
| Ground-glass attenuation plus traction<br>bronchiolectasis or bronchiectasis | 9.3 ± 17.8            | 16.6 ± 21.7               | 0.08    |
| Air-space consolidation plus traction<br>bronchiolectasis or bronchiectasis  | 2.4 ± 7.8             | 5.6 ± 10.3                | 0.01    |
| Honeycombing                                                                 | 0.0 ± 0.0             | 0.0 ± 0.0                 | NS      |
| Total area with traction bronchiolectasis<br>or bronchiectasis               | 11.8 ± 18.0           | 22.1 ± 24.3               | 0.01    |

Data are mean ± standard deviation of percentage of lung involvement.

NS = not significant

Mann-Whitney U test

**Table 3. Comparison of primary and secondary outcomes between the cut-off value showing extent of fibroproliferative changes on high-resolution CT at the onset of**

**ARDS**

| Variable                                   | High-Resolution Computed Tomographic<br>(CT) score |                   | p value  |
|--------------------------------------------|----------------------------------------------------|-------------------|----------|
|                                            | < 210<br>(n = 47)                                  | ≥ 210<br>(n = 38) |          |
| 60-Day mortality (%)                       | 19.1                                               | 57.9              | < 0.0001 |
| No. of hospital death                      | 9                                                  | 22                |          |
| Causes of death                            |                                                    |                   |          |
| Multiple organ failure                     | 8                                                  | 18                |          |
| Respiratory failure                        | 1                                                  | 4                 |          |
| No. of ventilator-free days at day 28      | 14.3 ± 7.6                                         | 5.1 ± 8.0         | < 0.0001 |
| No. of organ-failure-free days             |                                                    |                   |          |
| Cardiovascular failure                     | 22.4 ± 8.1                                         | 16.1 ± 10.9       | 0.009    |
| Coagulation abnormalities                  | 23.0 ± 8.9                                         | 17.8 ± 10.4       | 0.017    |
| Hepatic failure                            | 23.3 ± 8.2                                         | 19.6 ± 9.5        | 0.11     |
| Renal failure                              | 21.7 ± 10.9                                        | 19.6 ± 9.6        | 0.29     |
| No. of incidence of barotraumas (%)        | 3 (6.4)                                            | 8 (21.1)          | 0.056    |
| No. of ventilator-associated pneumonia (%) | 16 (34.0)                                          | 20 (52.6)         | 0.13     |

Plus-minus values are mean ± SD. Continuous variables with non-normal distribution were compared with the use of Mann-Whitney U test and categorical variables with Fisher's exact test.

**Table 4a. Univariate Cox regression analysis of variables potentially associated with mortality at day 180 in patients with ARDS.**

| Variable                                  | P value | Hazard ratio | 95% CI    |
|-------------------------------------------|---------|--------------|-----------|
| HRCT score                                | 0.0019  | 1.22*        | 1.08-1.38 |
| Age                                       | 0.5411  | 0.99         | 0.96-1.02 |
| Sepsis                                    | 0.4020  | 1.34         | 0.67-2.67 |
| APACHE II score                           | 0.6578  | 0.98         | 0.92-1.06 |
| SOFA score                                | 0.1724  | 0.92         | 0.82-1.04 |
| McCabe score                              | 0.9609  | 0.98         | 0.41-2.32 |
| PaO <sub>2</sub> / FiO <sub>2</sub> ratio | 0.6119  | 1.00         | 0.99-1.01 |
| Serum Albumin                             | 0.0982  | 0.57         | 0.30-1.11 |

**Table 4b. Multivariate Cox regression analysis of prognostic factors associated with mortality at day 180 in patients with ARDS**

| Variable      | P value | Hazard ratio | 95% CI    |
|---------------|---------|--------------|-----------|
| HRCT score    | 0.0051  | 1.20*        | 1.06-1.36 |
| Serum Albumin | 0.2618  | 0.67         | 0.33-1.36 |

Abbreviation: HRCT: high-resolution computed tomography

\*Expressed as mortality change per 10% increase in area of attenuation with traction bronchiectasis on high-resolution CT.

**Table 5. Multiple logistic regression analysis of variables potentially associated with ventilator-associated outcomes.**

**Table 5a. Ventilator-weaning within 28 days in patients with ARDS.**

| Variable      | P value | Odds ratio | 95% CI    |
|---------------|---------|------------|-----------|
| HRCT score    | 0.0006  | 0.63*      | 0.48-0.82 |
| Serum Albumin | 0.1727  | 2.09       | 0.72-6.03 |

Abbreviation: HRCT: high-resolution computed tomography

\*Expressed as mortality change per 10% increase in area of attenuation with traction bronchiectasis on high-resolution CT.

**Table 5b. The incidence of the Barotrauma**

| Variable      | P value | Odds ratio | 95% CI    |
|---------------|---------|------------|-----------|
| HRCT score    | 0.0183  | 1.61*      | 1.08-2.38 |
| APACHE II     | 0.4724  | 0.92       | 0.74-1.15 |
| SOFA score    | 0.9110  | 1.02       | 0.68-1.55 |
| Serum Albumin | 0.5156  | 0.53       | 0.08-3.65 |
| Serum LDH     | 0.0158  | 1.05       | 1.01-1.09 |

Abbreviation: HRCT: high-resolution computed tomography

\*Expressed as mortality change per 10% increase in area of attenuation with traction bronchiectasis on high-resolution CT.

**Table 5c. The complication of the Ventilator-associated pneumonia**

| Variable                                  | P value | Odds ratio | 95% CI      |
|-------------------------------------------|---------|------------|-------------|
| Liver cirrhosis                           | 0.0286  | 13.34      | 1.31-135.60 |
| HRCT score                                | 0.0041  | 1.46*      | 1.13-1.89   |
| PaO <sub>2</sub> / FiO <sub>2</sub> ratio | 0.0236  | 0.99       | 0.98-1.00   |

Abbreviation: HRCT: high-resolution computed tomography

\*Expressed as mortality change per 10% increase in area of attenuation with traction

bronchiectasis on high-resolution CT.



## FIGURE LEGENDS

Figure 1. Outlines of the study.

Figure 2. High-resolution computed tomography (CT) findings correlated with pathology

a.: High-resolution CT findings corresponding to exudative phase of ARDS. HRCT scan at the level of right middle lobe shows dependent airspace consolidation without traction bronchiectasis and nondependent areas of sparing. The patient was a 68-year-old man with ARDS due to *Streptococcus pneumoniae*.

b.: High-resolution CT findings corresponding to fibroproliferative phase of ARDS. HRCT scan at the level of right lower lobe shows extensive airspace consolidation and ground-glass attenuation associated with traction bronchiectasis (arrows). The patient was a 84-year-old woman with ARDS due to sepsis.

c.: High-resolution CT findings corresponding to fibrotic phase of ARDS. HRCT scan at the level of right inferior pulmonary vein shows extensive ground-glass attenuation associated with traction bronchiectasis (arrows), coarse reticulation and cystic changes (arrowheads). The patient was a 65-year-old woman with ARDS due to *viral pneumoniae*. (Sequential changes of HRCT findings were shown in the supplemental figure.)

Figure 3. Receiver operator characteristic (ROC) curve of prognostic value of the high-resolution computed tomography (HRCT) score. ROC identified the optimal cut-off value of 210 determined by the Youden Index for prediction of survival at Day 60 with 71 % sensitivity of and 72 % specificity (AUC, 0.71; 95% confidence interval, 0.61-0.82) and for prediction of survival at Day 180 with 71% sensitivity and 76 % specificity (AUC, 0.73; 95%CI, 0.62-0.84).

1  
2  
3  
4  
5  
6  
7  
8  
9  
10  
11  
12  
13  
14  
15  
16  
17  
18  
19  
20  
21  
22  
23  
24  
25  
26  
27  
28  
29  
30  
31  
32  
33  
34  
35  
36  
37  
38  
39  
40  
41  
42  
43  
44  
45  
46  
47  
48  
49  
50  
51  
52  
53  
54  
55  
56  
57  
58  
59  
60

Figure 4a. Day 60-mortality rate of each major cause of ARDS.

Figure 4b. Day 60-mortality rate compared between the optimal cut-off value of high-resolution computed tomography (HRCT) score in each cause. Regardless of the cause, the mortality rate of a patient with a lower CT score was significantly lower than that of a patient with a higher CT score.

Figure 5. Receiver operator characteristic (ROC) curve of prediction of the ventilator weaning within 28 days from high-resolution computed tomography (HRCT) score. ROC curve identified the optimal cut-off value of 210 determined by the Youden Index for prediction of ventilator weaning at day 28 with 75 % sensitivity and 76 % specificity (AUC, 0.77; 95%CI, 0.67-0.88).

Figure 6a. Receiver operator characteristic (ROC) curve of prediction of the onset of barotrauma from high-resolution computed tomography (HRCT) score. ROC curve identified the optimal cut-off value of 235 determined by the Youden Index for prediction of barotraumas onset with 73 % sensitivity and 77 % specificity (AUC, 0.77; 95%CI, 0.59-0.95)

Figure 6b. Comparison of the incidence of barotraumas between patients with the optimal cut-off value of CT score identified from ROC curve. The incidence of barotrauma of a patient with a lower CT score was significantly lower than that of a patient with a higher CT score.

Figure 7. Sequential changes of Sequential Organ Failure Assessment (SOFA) scores. The SOFA score of a patient with a lower CT score (< 210) significantly decreased from day 1 to day 14 ( $p = 0.0016$ ). The SOFA score of a patient of a patient with a higher CT

1  
2  
3  
4  
5  
6 score ( $\geq 210$ ) significantly increased from day 1 to day 14 ( $p = 0.027$ ). Four patients  
7  
8 with a lower CT score ( $< 210$ ) and 9 patients with a higher CT score ( $\geq 210$ ) who died  
9  
10 within 14 days were excluded.  
11  
12  
13  
14  
15  
16  
17  
18  
19  
20  
21  
22  
23  
24  
25  
26  
27  
28  
29  
30  
31  
32  
33  
34  
35  
36  
37  
38  
39  
40  
41  
42  
43  
44  
45  
46  
47  
48  
49  
50  
51  
52  
53  
54  
55  
56  
57  
58  
59  
60

For peer review only

**REFERENCES**

1. Ware LB, Matthay MA. The acute respiratory distress syndrome. *N Engl J Med* 2000;342:1334–1349
2. Bernard GR. Acute respiratory distress syndrome. A historical perspective. *Am J Respir Crit Care Med* 2005;172:798–806.
3. Tomashefski JF Jr. Pulmonary pathology of the adult respiratory distress syndrome. *Clin Chest Med* 1990;11:593-619.
4. Hudson LD, Hough CL. Therapy for late-phase acute respiratory distress syndrome. *Clin Chest Med* 2006; 27:671-677
5. Patel SR, Karpaliotis D, Ayas NT, et al. The role of open-lung biopsy in ARDS. *Chest* 2004;125:197-202.
6. Papazian L, Doddoli C, Chetaille B, et al. A contributive results of open-lung biopsy improves survival in acute respiratory distress syndrome patients. *Crit Care Med* 2007; 35:755-762.
7. Clark JG, Milberg JA, Steinberg KP, Hudson LD. Type III procollagen peptide in the adult respiratory distress syndrome: association of increased peptide levels in bronchoalveolar lavage fluid with increased risk for death. *Ann Intern Med* 1995;122:17-23.
8. Chesnutt AN, Matthay MA, Tibayan FA, Clark JG. Early detection of type III procollagen peptide in acute lung injury: pathogenetic and prognostic significance. *Am J Respir Crit Care Med* 1997; 156:840-845.
9. Meduri GU, Tolley EA, Chinn A, Stentz F, Postlethwaite A. Procollagen type I and III aminoterminal propeptide levels during acute respiratory distress syndrome and in response to methylprednisolone treatment. *Am J Respir Crit Care Med* 1998;158:1432–1441.
10. Marshall RP, Bellingan G, Webb S, et al. Fibroproliferation occurs early in the acute

1  
2  
3  
4  
5  
6 respiratory distress syndrome and impacts on outcome. *Am J Respir Crit Care Med*  
7  
8  
9 2000;162:1783–1788.

10  
11 11. Ichikado K, Johkoh T, Ikezoe J, *et al.* Acute interstitial pneumonia: high-resolution  
12  
13 CT findings correlated with pathology. *Am J Roentgenol* 1997;168:333–338.

14  
15 12. Ichikado K, Suga M, Gushima Y, *et al.* Hyperoxia-induced diffuse alveolar damage  
16  
17 in pigs: correlation between thin-section CT and histopathologic findings. *Radiology*  
18  
19 2000;216:531–538.

20  
21  
22 13. Ichikado K, Suga M, Müller NL, *et al.* Acute interstitial pneumonia: comparison of  
23  
24 high-resolution computed tomography findings between survivors and non-survivors.  
25  
26 *Am J Respir Crit Care Med* 2002;165:1551–1556.

27  
28  
29 14. Ichikado K. Permeability edema. In: Muller NL, Silva IS eds, *Imaging of the chest*,  
30  
31 Philadelphia: Saunders Elsevier, 2008; 964-977.

32  
33 15. Ichikado K, Suga M, Muranaka H, *et al.* Prediction of prognosis for acute  
34  
35 respiratory distress syndrome with thin-section CT: validation in 44 cases. *Radiology*  
36  
37 2006; 238:321-329.

38  
39 16. Bernard GR, Artigas A, Brigham KL, *et al.* The American-European Consensus  
40  
41 Conference on ARDS. Definitions, mechanisms, relevant outcomes, and clinical trial  
42  
43 coordination. *Am J Respir Crit Care Med* 1994;149:818–824.

44  
45 17. Fujimoto K, Taniguchi H, Johkoh T, *et al.* Acute exacerbation of idiopathic  
46  
47 pulmonary fibrosis: high-resolution CT scores predict mortality. *Eur Radiol* 2012  
48  
49 Jan;22(1):83-92. Epub 2011 Aug 7.

50  
51 18. Mukae H, Ishimoto H, Sakamoto N, *et al.* Clinical differences between interstitial  
52  
53 lung disease associated with clinically amyopathic dermatomyositis and classic  
54  
55 dermatomyositis. *CHEST* 2009;136:1341-1347.

56  
57 19. Committee for the Japanese Respiratory Society Guidelines for the Management of  
58  
59  
60

1  
2  
3  
4  
5  
6 Respiratory Infections. Empiric treatment of community-acquired pneumonia in adults.

7  
8  
9 *Respirology* 2006;11:S101-S101

10  
11 20. Committee for the Japanese Respiratory Society Guidelines for the Management of  
12 Respiratory Infections. Antibacterial therapy of hospital-acquired pneumonia.

13  
14  
15 *Respirology* 2004; 9 (suppl):S16-24

16  
17 21. The Japanese Association for Infectious Diseases and The Japanese Society of  
18 Chemotherapy Guidelines for Antimicrobial Use (in Japanese). In: The Japanese  
19 Association for Infectious Diseases and The Japanese Society of Chemotherapy eds,  
20 Tokyo: Kyowakikaku, 2005; p84-88, p106-121.

21  
22 22. Committee for the Japanese Respiratory Society Guidelines for the Acute Lung  
23 Injury and Acute Respiratory Distress Syndrome (in Japanese). In: The Japanese  
24 Respiratory Society eds, Tokyo:Nankoudo, 2004;p33-47.

25  
26 23. Clinical practice guidelines for acute respiratory distress syndrome. *The Japanese*  
27 *Journal of Respiratory Care* 2004;21:44-61.

28  
29 24. American Thoracic Society. Guidelines for the management of adults with  
30 community-acquired pneumonia: diagnosis, assessment of severity, antimicrobial  
31 therapy, and prevention. *Am J Respir Crit Care Med* 2001; 163:1730-1754

32  
33 25. Mandell LA, Bartlett JG, Dowell SF, et al. Update of practice guidelines for  
34 management of community-acquired pneumonia in immunocompetent adults. *Infectious*  
35 *Diseases Society of America. Clin Infect Dis* 2003; 37:1405-1432

36  
37 26. Steinberg KP, Hudson LD, Goodman RB, et al. Efficacy and safety of  
38 corticosteroids for persistent acute respiratory distress syndrome. *N Engl J Med*  
39 2006;354: 1671-1684

40  
41 27. Peter JV, John P, Graham P, Moran JL, Geroge IA, Bersten A. Corticosteroids in the  
42 prevention and treatment of acute respiratory distress syndrome (ARDS) in adults:  
43 meta-analysis. *BMJ* 2008;336(7651):1006-1009

- 1  
2  
3  
4  
5  
6 28. Tang BMP, Craig JC, Eslick GD, Seppelt I, McLean AS. Use of corticosteroids in  
7 acute lung injury and acute respiratory distress syndrome: a systemic review and  
8 meta-analysis. *Crit Care Med* 2009;37:1594-1603  
9  
10  
11 29. **Meduri GU, Annane D, Chrousos GP, Marik PE, Sinclair SE. Activation and**  
12 **regulation of systemic inflammation in ARDS. Rationale for prolonged**  
13 **glucocorticoid therapy. *CHEST* 2009;136:1631-1643**  
14  
15  
16 30. Muduri GU, Headley AS, Golden E, et al. Effect of prolonged methylprednisolone  
17 therapy in unresolving acute respiratory distress syndrome. A randomized control trial.  
18 *JAMA* 1998;280:159-165  
19  
20  
21 31. Ventilation with lower tidal volumes as compared with traditional tidal volumes for  
22 acute lung injury and the acute respiratory distress syndrome. The Acute Respiratory  
23 Distress Syndrome Network. *N Engl J Med* 2000; 342(18):1301-1308  
24  
25  
26 32. Evidence-based guidelines for weaning and discontinuing ventilatory support.  
27 *CHEST* 2001;120:375S-395S  
28  
29  
30 33. Pinhu L, Whitehead T, Evans T, et al. Ventilator-associated lung injury. *Lancet*  
31 2003;361:332-340.24.  
32  
33  
34 34. Fagon JY, Chastre J, Domart Y, et al. Nosocomial pneumonia in patients receiving  
35 continuous mechanical ventilation. Prospective analysis of 52 episodes with use of a  
36 protected specimen brush and quantitative culture techniques. *Am Rev Respir Dis*  
37 1989;139:877-884.  
38  
39  
40 35. Monchi M, Bellenfant F, Cariou A, et al. Early predictive factors of survival in the  
41 acute respiratory distress syndrome. A multivariate analysis. *Am J Respir Crit Care Med*  
42 1998;158:1076-1081.  
43  
44  
45 36. Ely EW, Wheeler AP, Thompson BT, et al. Recovery rate and prognosis in older  
46 persons who developed acute lung injury and the acute respiratory distress syndrome.  
47 *Ann Intern Med* 2002;136:25-36.  
48  
49  
50  
51  
52  
53  
54  
55  
56  
57  
58  
59  
60

1  
2  
3  
4  
5  
6 37. Estenssoro E, Dubin A, Laffaire E, *et al.* Incidence, clinical course, and outcome in  
7 217 patients with acute respiratory distress syndrome. *Crit Care Med*  
8 2002;30:2450–2456.  
9

10  
11 38. Esteban A, Anzueto A, Frutos F, *et al.* Characteristics and outcomes in adult patients  
12 receiving mechanical ventilation. *JAMA* 2002;287:345-355.  
13

14  
15 39. Gattinoni L, Bombino M, Pelosi P, *et al.* Lung structure and function in different  
16 stages of severe adult respiratory distress syndrome. *JAMA* 1994;271:1772–1779.  
17

18  
19 **40. Meduri GU. Clinical review: a paradigm shift: the bidirectional effect of**  
20 **inflammation on bacterial growth. Clinical implications for patients with acute**  
21 **respiratory distress syndrome. Critical Care 2002;6:24-29.**  
22

23  
24  
25 41. Lamy M, Fallat RJ, Koeniger E, *et al.* Pathologic features and mechanisms of  
26 hypoxemia in adult respiratory distress syndrome. *Am Rev Respir Dis*  
27 1976;114:267-287.  
28

29  
30  
31 **42. Sorbo LD and Slutsky AS. Acute respiratory distress syndrome and multiple**  
32 **organ failure. Curr Opin Crit Care 2011;17:1-6**  
33  
34  
35  
36  
37  
38  
39  
40  
41  
42  
43  
44  
45  
46  
47  
48  
49  
50  
51  
52  
53  
54  
55  
56  
57  
58  
59  
60



1  
2  
3  
4  
5  
6 **Patient confidentiality**

7  
8 Details has been removed from this case description.  
9  
10  
11  
12  
13  
14  
15  
16  
17  
18  
19  
20  
21  
22  
23  
24  
25  
26  
27  
28  
29  
30  
31  
32  
33  
34  
35  
36  
37  
38  
39  
40  
41  
42  
43  
44  
45  
46  
47  
48  
49  
50  
51  
52  
53  
54  
55  
56  
57  
58  
59  
60

For peer review only

1  
2  
3  
4  
5  
6  
7  
8  
9  
10  
11  
12  
13  
14  
15  
16  
17  
18  
19  
20  
21  
22  
23  
24  
25  
26  
27  
28  
29  
30  
31  
32  
33  
34  
35  
36  
37  
38  
39  
40  
41  
42  
43  
44  
45  
46  
47  
48  
49  
50  
51  
52  
53  
54  
55  
56  
57  
58  
59  
60

Figure 1.

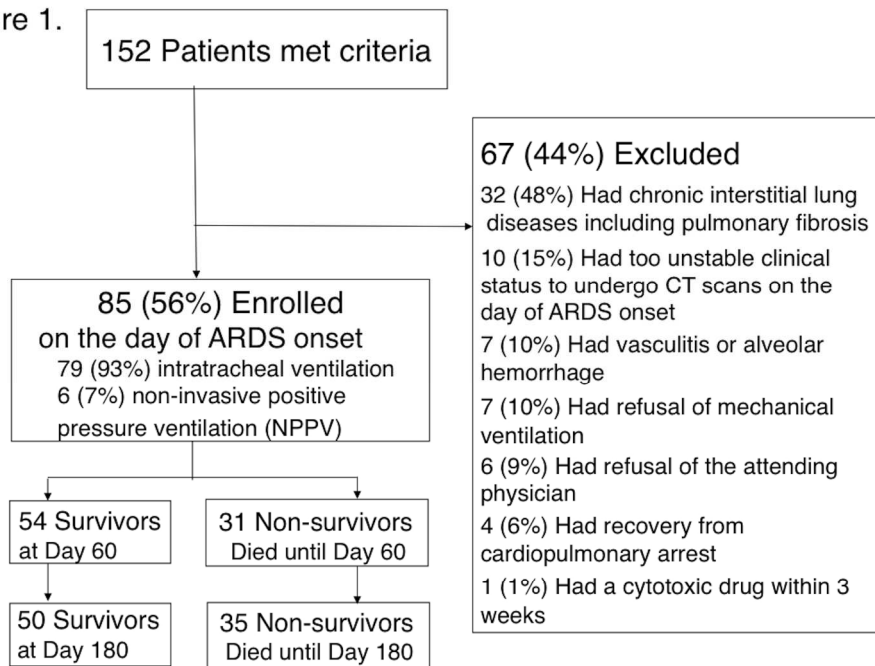

382x264mm (150 x 150 DPI)

view only



**Fibroproliferative Changes on High-Resolution Computed Tomography in the Acute Respiratory Distress Syndrome Predict Mortality and Ventilator Dependency: A Prospective Observational Cohort Study**

|                                 |                                                                                                                                                                                                                                                                                                                                                                                                                                                                                                                                                                                                                                                                                                                                                                                                                                                                                                                                                                                                                                                                                                                                                                                                                                                                                                                                                                                                                                                                                                                                                                                                                                                                                                                                                                                                                                                                                            |
|---------------------------------|--------------------------------------------------------------------------------------------------------------------------------------------------------------------------------------------------------------------------------------------------------------------------------------------------------------------------------------------------------------------------------------------------------------------------------------------------------------------------------------------------------------------------------------------------------------------------------------------------------------------------------------------------------------------------------------------------------------------------------------------------------------------------------------------------------------------------------------------------------------------------------------------------------------------------------------------------------------------------------------------------------------------------------------------------------------------------------------------------------------------------------------------------------------------------------------------------------------------------------------------------------------------------------------------------------------------------------------------------------------------------------------------------------------------------------------------------------------------------------------------------------------------------------------------------------------------------------------------------------------------------------------------------------------------------------------------------------------------------------------------------------------------------------------------------------------------------------------------------------------------------------------------|
| Journal:                        | <i>BMJ Open</i>                                                                                                                                                                                                                                                                                                                                                                                                                                                                                                                                                                                                                                                                                                                                                                                                                                                                                                                                                                                                                                                                                                                                                                                                                                                                                                                                                                                                                                                                                                                                                                                                                                                                                                                                                                                                                                                                            |
| Manuscript ID:                  | bmjopen-2011-000545.R2                                                                                                                                                                                                                                                                                                                                                                                                                                                                                                                                                                                                                                                                                                                                                                                                                                                                                                                                                                                                                                                                                                                                                                                                                                                                                                                                                                                                                                                                                                                                                                                                                                                                                                                                                                                                                                                                     |
| Article Type:                   | Research                                                                                                                                                                                                                                                                                                                                                                                                                                                                                                                                                                                                                                                                                                                                                                                                                                                                                                                                                                                                                                                                                                                                                                                                                                                                                                                                                                                                                                                                                                                                                                                                                                                                                                                                                                                                                                                                                   |
| Date Submitted by the Author:   | 18-Jan-2012                                                                                                                                                                                                                                                                                                                                                                                                                                                                                                                                                                                                                                                                                                                                                                                                                                                                                                                                                                                                                                                                                                                                                                                                                                                                                                                                                                                                                                                                                                                                                                                                                                                                                                                                                                                                                                                                                |
| Complete List of Authors:       | <p>Ichikado, Kazuya; Saiseikai Kumamoto Hospital, Division of Respiratory Medicine<br/> Muranaka, Hiroyuki; Saiseikai Kumamoto Hospital, Division of Respiratory Medicine<br/> Gushima, Yasuhiro; Saiseikai Kumamoto Hospital, Division of Respiratory Medicine<br/> Kotani, Toru; Tokyo Women's Medical University, Department of Anesthesiology and Intensive Care<br/> Nader, Habashi; R Adams Cowley Shock Trauma Center, Multi-trauma Intensive Care Unit<br/> Fujimoto, Kiminori; Kurume University School of Medicine, Department of Radiology; Kurume University Hospital, Center for Diagnostic Imaging<br/> Johkoh, Takeshi; Kinki Central Hospital of Mutual Aid Association of Public Teachers, Department of Radiology<br/> Iwamoto, Norihiro; Saiseikai Kumamoto Hospital, Division of Respiratory Medicine<br/> Kawamura, Kodai; Saiseikai Kumamoto Hospital, Division of Respiratory Medicine<br/> Nagano, Junji; Kumamoto City Hospital, Pulmonary Division<br/> Fukuda, Kohichiro; Kumamoto City Hospital, Pulmonary Division<br/> Hirata, Naomi; Kumamoto Chu-oh Hospital, Pulmonary Division<br/> Yoshinaga, Takeshi; Kumamoto Chu-oh Hospital, Pulmonary Division<br/> Ichiyasu, Hidenori; Kumamoto University Graduate School of Medical Sciences, Department of Respiratory Medicine<br/> Tsumura, Shinsuke; Kumamoto University Graduate School of Medical Sciences, Department of Respiratory Medicine<br/> Kohrogi, Hirotsugu; Kumamoto University Graduate School of Medical Sciences, Department of Respiratory Medicine<br/> Kawaguchi, Atsushi; Biostatistics Center, Kurume University School of Medicine<br/> Yoshioka, Masakazu; Saiseikai Kumamoto Hospital, Division of Respiratory Medicine<br/> Sakuma, Tsutomu; Kanazawa Medical University, Thoracic Surgery<br/> Suga, Moritaka; Saiseikai Kumamoto Hospital, Division of Respiratory Medicine</p> |
| <b>Primary Subject Heading</b>: | Respiratory medicine                                                                                                                                                                                                                                                                                                                                                                                                                                                                                                                                                                                                                                                                                                                                                                                                                                                                                                                                                                                                                                                                                                                                                                                                                                                                                                                                                                                                                                                                                                                                                                                                                                                                                                                                                                                                                                                                       |

1  
2  
3  
4  
5  
6  
7  
8  
9  
10  
11  
12  
13  
14  
15  
16  
17  
18  
19  
20  
21  
22  
23  
24  
25  
26  
27  
28  
29  
30  
31  
32  
33  
34  
35  
36  
37  
38  
39  
40  
41  
42  
43  
44  
45  
46  
47  
48  
49  
50  
51  
52  
53  
54  
55  
56  
57  
58  
59  
60

|                            |                                                                                                                            |
|----------------------------|----------------------------------------------------------------------------------------------------------------------------|
| Secondary Subject Heading: | Intensive care, Radiology and imaging                                                                                      |
| Keywords:                  | Adult intensive & critical care < ANAESTHETICS, Thoracic medicine < INTERNAL MEDICINE, Chest imaging < RADIOLOGY & IMAGING |
|                            |                                                                                                                            |

SCHOLARONE™  
Manuscripts

For peer review only



Figure 2a: High-resolution CT findings corresponding to exudative phase of ARDS. HRCT scan at the level of right middle lobe shows dependent airspace consolidation and nondependent areas of sparing. The patient was a 68-year-old man with ARDS due to *Streptococcus pneumoniae* pneumonia.

Figure 2b: High-resolution CT findings corresponding to fibroproliferative phase of ARDS. HRCT scan at the level of right lower lobe shows extensive airspace consolidation and ground-glass attenuation associated with traction bronchiectasis (arrows). The patient was a 84-year-old woman with ARDS due to sepsis.

Figure 2c: High-resolution CT findings corresponding to fibrotic phase of ARDS. HRCT scan at the level of right inferior pulmonary vein shows extensive ground-glass attenuation associated with traction bronchiectasis (arrows), coarse reticulation and cystic changes (arrowheads). The patient was a 65-year-old woman with ARDS due to viral pneumonia. (Sequential changes of HRCT findings were shown in the supplemental figure.)

#### High-resolution computed tomography (CT) findings correlated with pathology

- a.: High-resolution CT findings corresponding to exudative phase of ARDS. HRCT scan at the level of right middle lobe shows dependent airspace consolidation without traction bronchiectasis and nondependent areas of sparing. The patient was a 68-year-old man with ARDS due to *Streptococcus pneumoniae*.
- b.: High-resolution CT findings corresponding to fibroproliferative phase of ARDS. HRCT scan at the level of right lower lobe shows extensive airspace consolidation and ground-glass attenuation associated with traction bronchiectasis (arrows). The patient was a 84-year-old woman with ARDS due to sepsis.
- c.: High-resolution CT findings corresponding to fibrotic phase of ARDS. HRCT scan at the level of right inferior pulmonary vein shows extensive ground-glass attenuation associated with traction bronchiectasis (arrows), coarse reticulation and cystic changes (arrowheads). The patient was a 65-year-old woman with ARDS due to viral pneumonia. (Sequential changes of HRCT findings were shown in the supplemental figure.)

180x124mm (300 x 300 DPI)

Figure 3 Receiver Operating Characteristic Curve of the prediction of Day 60 and Day 180 mortality

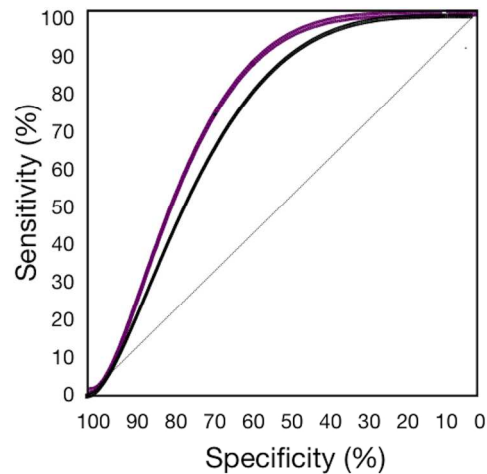

— Day 60 mortality; AUC, 0.71 (0.61-0.82); sensitivity, 71 %, specificity, 72 %  
— Day 180 mortality; AUC 0.73 (0.62-0.84); sensitivity, 71 %, specificity, 76 %

Receiver operator characteristic (ROC) curve of prognostic value of the high-resolution computed tomography (HRCT) score. ROC identified the optimal cut-off value of 210 determined by the Youden Index for prediction of survival at Day 60 with 71 % sensitivity of and 72 % specificity (AUC, 0.71; 95% confidence interval, 0.61-0.82) and for prediction of survival at Day 180 with 71% sensitivity and 76 % specificity (AUC, 0.73; 95%CI, 0.62-0.84).  
180x124mm (300 x 300 DPI)



Figure 4a. Day 60-mortality rate of each major cause of ARDS.

Figure 4b. Day 60-mortality rate compared between the optimal cut-off value of high-resolution computed tomography (HRCT) score in each cause. Regardless of the cause, the mortality rate of a patient with a lower CT score was significantly lower than that of a patient with a higher CT score.

180x124mm (300 x 300 DPI)

Figure 5  
Receiver Operating Characteristic Curve of the prediction of ventilator weaning during 28 days



AUC, 0.77 (0.67-0.88); sensitivity, 75 %, specificity, 76 %

Receiver operator characteristic (ROC) curve of prediction of the ventilator weaning within 28 days from high-resolution computed tomography (HRCT) score. ROC curve identified the optimal cut-off value of 210 determined by the Youden Index for prediction of ventilator weaning at day 28 with 75 % sensitivity and 76 % specificity (AUC, 0.77; 95%CI, 0.67-0.88).  
180x124mm (300 x 300 DPI)



Figure 6a.  
Receiver operating characteristics curve of the prediction  
of the onset of barotrauma



AUC, 0.77 (0.59-0.95); sensitivity, 73 %, specificity, 77 %

Figure 6b.  
Incidence of barotrauma  
Compared between the cut of value  
of CT score



Figure 6a. Receiver operator characteristic (ROC) curve of prediction of the onset of barotrauma from high-resolution computed tomography (HRCT) score. ROC curve identified the optimal cut-off value of 235 determined by the Youden Index for prediction of barotraumias onset with 73 % sensitivity and 77 % specificity (AUC, 0.77; 95%CI, 0.59-0.95)

Figure 6b. Comparison of the incidence of barotraumias between patients with the optimal cut-off value of CT score identified from ROC curve. The incidence of barotrauma of a patient with a lower CT score was significantly lower than that of a patient with a higher CT score.

180x124mm (300 x 300 DPI)

Figure 7. Sequential changes of SOFA score

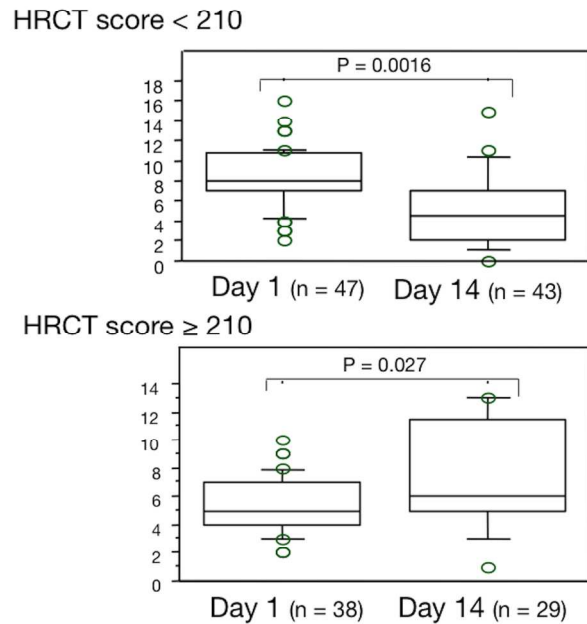

Sequential changes of Sequential Organ Failure Assessment (SOFA) scores. The SOFA score of a patient with a lower CT score (< 210) significantly decreased from day 1 to day 14 ( $p = 0.0016$ ). The SOFA score of a patient of a patient with a higher CT score ( $\geq 210$ ) significantly increased from day 1 to day 14 ( $p = 0.027$ ). Four patients with a lower CT score (< 210) and 9 patients with a higher CT score ( $\geq 210$ ) who died within 14 days were excluded.

180x134mm (300 x 300 DPI)

STROBE 2007 (v4) Statement—Checklist of items that should be included in reports of *cohort studies*

| Section/Topic                | Item # | Recommendation                                                                                                                                                                       | Reported on page # |
|------------------------------|--------|--------------------------------------------------------------------------------------------------------------------------------------------------------------------------------------|--------------------|
| Title and abstract           | 1      | (a) Indicate the study's design with a commonly used term in the title or the abstract                                                                                               | Page 4             |
|                              |        | (b) Provide in the abstract an informative and balanced summary of what was done and what was found                                                                                  | Page 4             |
| <b>Introduction</b>          |        |                                                                                                                                                                                      | <b>Page 7-8</b>    |
| Background/rationale         | 2      | Explain the scientific background and rationale for the investigation being reported                                                                                                 | Page 7-8           |
| Objectives                   | 3      | State specific objectives, including any prespecified hypotheses                                                                                                                     | Page 8             |
| <b>Methods</b>               |        |                                                                                                                                                                                      | <b>Page 8-13</b>   |
| Study design                 | 4      | Present key elements of study design early in the paper                                                                                                                              | Page 8             |
| Setting                      | 5      | Describe the setting, locations, and relevant dates, including periods of recruitment, exposure, follow-up, and data collection                                                      | Page 8, 12         |
| Participants                 | 6      | (a) Give the eligibility criteria, and the sources and methods of selection of participants. Describe methods of follow-up                                                           | Page 8             |
|                              |        | (b) For matched studies, give matching criteria and number of exposed and unexposed                                                                                                  | Page 26, Table 1   |
| Variables                    | 7      | Clearly define all outcomes, exposures, predictors, potential confounders, and effect modifiers. Give diagnostic criteria, if applicable                                             | Page 12            |
| Data sources/<br>measurement | 8*     | For each variable of interest, give sources of data and details of methods of assessment (measurement). Describe comparability of assessment methods if there is more than one group | Page 8-12          |
| Bias                         | 9      | Describe any efforts to address potential sources of bias                                                                                                                            | Page 8             |
| Study size                   | 10     | Explain how the study size was arrived at                                                                                                                                            | Page 8             |
| Quantitative variables       | 11     | Explain how quantitative variables were handled in the analyses. If applicable, describe which groupings were chosen and why                                                         | Page 8-12          |
| Statistical methods          | 12     | (a) Describe all statistical methods, including those used to control for confounding                                                                                                | Page 13            |
|                              |        | (b) Describe any methods used to examine subgroups and interactions                                                                                                                  | Page 13            |
|                              |        | (c) Explain how missing data were addressed                                                                                                                                          | Figure 1           |
|                              |        | (d) If applicable, explain how loss to follow-up was addressed                                                                                                                       | Figure 1           |
|                              |        | (e) Describe any sensitivity analyses                                                                                                                                                | Page 13            |
| <b>Results</b>               |        |                                                                                                                                                                                      | <b>Page 14-17</b>  |

|                          |     |                                                                                                                                                                                                              |                       |
|--------------------------|-----|--------------------------------------------------------------------------------------------------------------------------------------------------------------------------------------------------------------|-----------------------|
| Participants             | 13* | (a) Report numbers of individuals at each stage of study—eg numbers potentially eligible, examined for eligibility, confirmed eligible, included in the study, completing follow-up, and analysed            | Page 14, Figure 1     |
|                          |     | (b) Give reasons for non-participation at each stage                                                                                                                                                         | Page 14, Figure 1     |
|                          |     | (c) Consider use of a flow diagram                                                                                                                                                                           | Page 14, Figure 1     |
| Descriptive data         | 14* | (a) Give characteristics of study participants (eg demographic, clinical, social) and information on exposures and potential confounders                                                                     | Page 26, Table 1      |
|                          |     | (b) Indicate number of participants with missing data for each variable of interest                                                                                                                          | Figure 1              |
|                          |     | (c) Summarise follow-up time (eg, average and total amount)                                                                                                                                                  | Figure 1              |
| Outcome data             | 15* | Report numbers of outcome events or summary measures over time                                                                                                                                               | Page 29, Table 3      |
| Main results             | 16  | (a) Give unadjusted estimates and, if applicable, confounder-adjusted estimates and their precision (eg, 95% confidence interval). Make clear which confounders were adjusted for and why they were included | Page 30-32, Table 4-5 |
|                          |     | (b) Report category boundaries when continuous variables were categorized                                                                                                                                    | Page 29, Table 3      |
|                          |     | (c) If relevant, consider translating estimates of relative risk into absolute risk for a meaningful time period                                                                                             | Page 30-32, Table 4-5 |
| Other analyses           | 17  | Report other analyses done—eg analyses of subgroups and interactions, and sensitivity analyses                                                                                                               | Figure 3-7            |
| <b>Discussion</b>        |     |                                                                                                                                                                                                              | Page 18-23            |
| Key results              | 18  | Summarise key results with reference to study objectives                                                                                                                                                     | Page 3                |
| <b>Limitations</b>       |     |                                                                                                                                                                                                              | Page 21-23            |
| Interpretation           | 20  | Give a cautious overall interpretation of results considering objectives, limitations, multiplicity of analyses, results from similar studies, and other relevant evidence                                   | Page 3                |
| Generalisability         | 21  | Discuss the generalisability (external validity) of the study results                                                                                                                                        | Page 21-23            |
| <b>Other information</b> |     |                                                                                                                                                                                                              | Page 2, 24-25, 41     |
| Funding                  | 22  | Give the source of funding and the role of the funders for the present study and, if applicable, for the original study on which the present article is based                                                | Page 5                |

\*Give information separately for cases and controls in case-control studies and, if applicable, for exposed and unexposed groups in cohort and cross-sectional studies.

**Note:** An Explanation and Elaboration article discusses each checklist item and gives methodological background and published examples of transparent reporting. The STROBE checklist is best used in conjunction with this article (freely available on the Web sites of PLoS Medicine at <http://www.plosmedicine.org/>, Annals of Internal Medicine at <http://www.annals.org/>, and Epidemiology at <http://www.epidem.com/>). Information on the STROBE Initiative is available at [www.strobe-statement.org](http://www.strobe-statement.org).

Figure 1.

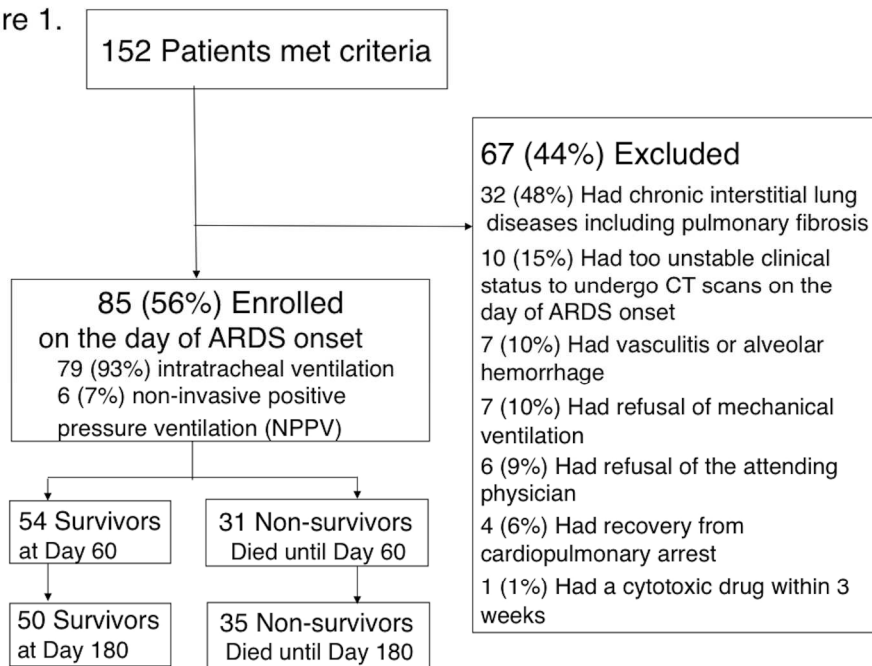

382x264mm (150 x 150 DPI)

view only

1  
2  
3  
4  
5  
6 Fibroproliferative Changes on High-Resolution Computed  
7  
8 Tomography in the Acute Respiratory Distress Syndrome  
9  
10  
11 Predict Mortality and Ventilator Dependency: A Prospective  
12  
13  
14 Observational Cohort Study  
15  
16  
17  
18  
19

20 Kazuya Ichikado, MD, PhD<sup>1</sup>, Hiroyuki Muranaka, MD, PhD<sup>1</sup>,  
21 Yasuhiro Gushima, MD, PhD<sup>1</sup>, Toru Kotani, MD<sup>2</sup>, Habashi M. Nader, MD<sup>3</sup>,  
22 Kiminori Fujimoto, MD, PhD<sup>4</sup>, Takeshi Johkoh, MD, PhD<sup>5</sup>,  
23 Norihiro Iwamoto, MD, PhD<sup>1</sup>, Kodai Kawamura, MD, PhD<sup>1</sup>,  
24 , Junji Nagano, MD, PhD<sup>6</sup>, Kohichiro Fukuda, MD, PhD<sup>6</sup>, Naomi Hirata, MD, PhD<sup>7</sup>,  
25 Takeshi Yoshinaga, MD, PhD<sup>7</sup>, Hidenori Ichiyasu, MD, PhD<sup>8</sup>, Shinsuke Tsumura, MD<sup>8</sup>,  
26 Hirotsugu Kohrogi, MD, PhD<sup>8</sup>, Atsushi Kawaguchi, PhD<sup>9</sup>, Masakazu Yoshioka, MD<sup>1</sup>,  
27 Tsutomu Sakuma, MD, PhD<sup>10</sup>, Moritaka Suga, MD, PhD<sup>1</sup>  
28  
29

30 <sup>1</sup> Division of Respiratory Medicine, Saiseikai Kumamoto Hospital, 5-3-1 Chikami, Kumamoto 861-4193,  
31 Japan, <sup>2</sup> Associate professor, Department of Anesthesiology and Intensive Care Tokyo Women's Medical  
32 University, Tokyo 162-8666, Japan, <sup>3</sup> Associate professor, Multi-trauma Intensive Care Unit, R Adams  
33 Cowley Shock Trauma Center, 22S, Greene Street, Baltimore, Maryland, USA, <sup>4</sup> Associate professor,  
34 Department of Radiology, Kurume University School of Medicine and Center for Diagnostic Imaging,  
35 Kurume University Hospital, 67 Asahi-machi, Kurume, Fukuoka 830-0011, Japan, <sup>5</sup> Director, Department  
36 of Radiology, Kinki Central Hospital of Mutual Aid Association of Public Teachers, Hyogo 664-0872,  
37 Japan, <sup>6</sup> Pulmonary Division, Kumamoto City Hospital, Kumamoto 862-09, Japan, <sup>7</sup> Pulmonary Division,  
38 Kumamoto Chu-oh Hospital, Tainoshima, Kumamoto 862-0965, Japan, <sup>8</sup> Department of Respiratory  
39 Medicine, Kumamoto University Graduate School of Medical Sciences, 1-1-1 Honjo, Kumamoto City  
40 860-8556, Japan, <sup>9</sup> Biostatistics Center, Kurume University School of Medicine, Kurume, Fukuoka  
41 830-0011, Japan, <sup>10</sup> Professor of Thoracic Surgery, Kanazawa Medical University, Uchinada, Ishikawa  
42 920-0293, Japan  
43  
44  
45  
46

47 Correspondence to: K. Ichikado, MD, PhD. Chief Chest Physician, E-mail to  
48 [ichikado-k-991017@lib.bbiq.jp](mailto:ichikado-k-991017@lib.bbiq.jp) or [kazuya-ichikado@saiseikaikumamoto.jp](mailto:kazuya-ichikado@saiseikaikumamoto.jp)  
49  
50  
51  
52  
53  
54  
55  
56  
57  
58  
59  
60

1  
2  
3  
4  
5  
6 **Conflict of interest disclosures:** None of the authors has declared any conflict of interest  
7  
8 related to this work.  
9

10  
11  
12  
13 **Keywords**

14  
15 acute respiratory distress syndrome, high-resolution computed tomography,  
16  
17 ventilator-associated lung injury, corticosteroids  
18  
19  
20  
21  
22  
23  
24  
25  
26  
27  
28  
29  
30  
31  
32  
33  
34  
35  
36  
37  
38  
39  
40  
41  
42  
43  
44  
45  
46  
47  
48  
49  
50  
51  
52  
53  
54  
55  
56  
57  
58  
59  
60

### 1) Article Focus

- Whether the extent of fibroproliferation on high-resolution CT (HRCT) scan at the time diagnosis of ARDS would impact 60-day and 180-day mortality?
- Whether the extent of fibroproliferation on HRCT scan at the time diagnosis of ARDS would impact ventilator dependency and its associated outcomes?
- Whether the extent of fibroproliferation on HRCT scan at the time diagnosis of ARDS would impact multiple-organ failure?

### 2) Key Messages

- Pulmonary fibroproliferation assessed by HRCT in patients with early ARDS predicts increased mortality.
- Pulmonary fibroproliferation assessed by HRCT in patients with early ARDS predicts ventilator dependency and its associated outcomes (barotraumas, ventilator-associated pneumonia).
- Pulmonary fibroproliferation assessed by HRCT in patients with early ARDS increases susceptibility to multiple organ failure.

### 3) Strengths and Limitations

- The CT score is based on our previous published studies correlating HRCT findings with pathology and has been evaluated in the other diseases.
- a relatively small number of patients from a single institution
- lack of correlation with either clinical parameters or pathologic findings



1  
2  
3  
4  
5  
6 **Objectives:** To examine whether the extent of fibroproliferative changes on  
7  
8 high-resolution computed tomography (HRCT) scan influences prognosis, ventilator  
9  
10 dependency, and the associated outcomes in patients with early acute respiratory  
11  
12 distress syndrome (ARDS).  
13

14  
15  
16 **Design:** A prospective observational cohort study  
17

18  
19 **Setting:** Intensive care unit in a teaching hospital  
20

21  
22 **Participants:** Eighty-five patients with ARDS who met American-European Consensus  
23  
24 Conference Criteria and eligible criteria.  
25

26  
27 **Interventions:** HRCT scans were performed and prospectively evaluated by two  
28  
29 independent observers on the day of diagnosis and graded into six findings according to  
30  
31 the extent of fibroproliferation. An overall HRCT score was obtained by previously  
32  
33 published method.  
34  
35

36  
37 **Primary and secondary outcomes: The primary outcome was 60-day mortality.**  
38

39  
40 Secondary outcomes included the number of ventilator-free days, organ failure-free  
41  
42 days, the incidence of barotraumas, and the occurrence of ventilator-associated  
43  
44 pneumonia.  
45  
46

47  
48 **Results:** Higher HRCT scores were associated with statistically significant decreases in  
49  
50 organ-failure free days as well as ventilator-free days. Multivariate Cox proportional  
51  
52 hazards model showed that the HRCT score remained an independent risk factor for  
53  
54 mortality (hazard ratio 1.20; 95% confidence interval 1.06, 1.36;  $p = 0.005$ ).  
55  
56  
57  
58  
59  
60

1  
2  
3  
4  
5  
6 Multivariate analysis also revealed that the CT score had predictive value for  
7  
8 ventilator-weaning within 28 days (odds ratio 0.63; 95% CI 0.48, 0.82; p = 0.0006) as  
9  
10 well as for an incidence of barotraumas (1.61; 95%CI 1.08, 2.38; p = 0.018) and for an  
11  
12 occurrence of ventilator-associated pneumonia (1.46; 95%CI 1.13,1.89; p = 0.004). **An**  
13  
14 **HRCT score < 210 enabled prediction of 60 day survival with 71 % sensitivity and**  
15  
16 **72 % specificity** and of ventilator-weaning failure within 28 days with 75 % sensitivity  
17  
18 and 76 % specificity.  
19  
20  
21  
22  
23

24 **Conclusions:** Pulmonary fibroproliferation assessed by HRCT in patients with early  
25  
26 ARDS predicts increased mortality with an increased susceptibility to multiple organ  
27  
28 failure, including ventilator dependency and its associated outcomes.  
29  
30  
31  
32  
33

#### 34 **Data sharing statement**

35  
36  
37 There is no additional data available.  
38  
39

#### 40 **Research grant**

41  
42  
43 This research received no specific grant from any funding agency in the public,  
44  
45 commercial or not-for-profit sectors.  
46  
47  
48  
49  
50  
51  
52  
53  
54  
55  
56  
57  
58  
59  
60

**Abbreviation list**

ARDS: acute respiratory distress syndrome

HRCT: high-resolution computed tomography

DAD: diffuse alveolar damage

APACHE II: Acute Physiology and Chronic Health Evaluation II score

SOFA score: Sequential Organ Failure Assessment score

MOF: multi-organ failure

DIC: disseminated intravascular coagulation

MDCT: multidetector-row computed tomography

PEEP: positive end-expiratory pressure

VAP: ventilator associated pneumonia

ROC: receiver-operator characteristic

AUC: area under the curve

CI: confidence interval

SD: standard deviation

## INTRODUCTION

The acute respiratory distress syndrome (ARDS) is the most severe form of a wide spectrum of pathological conditions designated as acute lung injury<sup>1,2</sup>. ARDS is considered to have an early and a late phase and is pathologically classified into three stages<sup>3</sup> in which an initial inflammatory injury with protein-rich edema and hemorrhage is followed by fibroproliferation, during which fibroblasts proliferate with organization and subsequent collagen deposition, resulting in lung remodeling, ultimately leading to fibrotic lung disease. The histological features of ARDS represent a poorly defined time-dependent stereotypic response to acute lung injury and are pathologically designated as diffuse alveolar damage<sup>3,4</sup>. **Fibroproliferation is part of the tissue host defense response – a tissue-protective reaction that consists of an integrated network of three simultaneously activated pathways [inflammation, coagulation, and tissue repair (fibroproliferation is one component of tissue repair)], which account for the histologic and physiologic changes observed with progression (maladaptive response) or resolution (adaptive response) of ARDS and multiple organ failure syndrome<sup>5</sup>. Although pathologic staging may be conceptually useful, improvement vs. worsening in physiological parameters (i.e., PaO<sub>2</sub>/FiO<sub>2</sub> ratio, etc) over time correlates with adaptive vs. maladaptive lung repair and outcome.** Clinicians can use pathophysiology (shunt vs. V/Q mismatch with increasing deadspace) to distinguish the transition from exudative to fibroproliferative ARDS,

1  
2  
3  
4  
5  
6 however, few features, except probably time, allow them to distinguish these  
7  
8 pathological phases without a lung biopsy<sup>6,7</sup>.  
9

10  
11 Data regarding the significance of a fibroproliferative response on mortality  
12  
13 risk assessed using bronchoalveolar lavage or tracheal aspirate in ARDS patients is  
14  
15 available<sup>8-11</sup>. High-resolution computed tomographic (HRCT) findings correlate with  
16  
17 the pathologic phases of diffuse alveolar damage<sup>12-15</sup>. Furthermore, we have previously  
18  
19 reported on the prognostic value of HRCT in determining the extent of  
20  
21 fibroproliferation in ARDS patients<sup>16</sup>. Based on HRCT appearance, less  
22  
23 fibroproliferation in early ARDS was associated with greater ventilator-free days and  
24  
25 less barotraumas<sup>16</sup>. **Because ARDS is a systemic disease with systemic inflammation,**  
26  
27 **core pathogenetic process affects the lung as well as extra-pulmonary vital organs.**  
28  
29 **In this prospective study, we evaluated not only what was found in the**  
30  
31 **retrospective study<sup>16</sup> but also the relationship between early fibroproliferation and**  
32  
33 **the progression to multiple organ failure;** whether the extent of fibroproliferation on  
34  
35 HRCT scan at the time diagnosis of ARDS would impact the susceptibility for ventilator  
36  
37 dependency and its associated complications and on the mortality.  
38  
39  
40  
41  
42  
43  
44  
45  
46  
47

## 48 METHODS

49  
50 One hundred and fifty two patients with ARDS diagnosed according to the  
51  
52 American-European Consensus Conference Criteria<sup>17</sup> were enrolled from October 1,  
53  
54 2004 to July 31, 2008 at our institution. This study was approved by an institutional  
55  
56  
57  
58  
59  
60

1  
2  
3  
4  
5  
6 review board of our hospital, and informed consent was obtained from the participants  
7  
8 or their families. On the basis of the survival in our retrospective study of 44 patients<sup>16</sup>,  
9  
10 we designated the number of patients more than 80 at least.  
11  
12

### 13 **Patients**

14  
15 Eligible patients were receiving mechanical ventilation by tracheal tube (n = 79)  
16  
17 or mask for non-invasive positive pressure ventilation (n = 6). Furthermore, HRCT scan  
18  
19 was performed on the day of diagnosis of ARDS by their consent. Exclusion criteria  
20  
21 were shown in Figure. 1. Especially, preexisting chronic interstitial lung diseases were  
22  
23 strictly excluded by history taking, imaging data available before onset of ARDS, and  
24  
25 the presence of coarse reticulation and honeycombing on HRCT scans suggesting of  
26  
27 chronic pulmonary fibrosis. Furthermore, the other preexisting pulmonary disease such  
28  
29 as pulmonary emphysema was documented from review of radiological reports.  
30  
31 Information about our patients' severity and characteristics is reported in Table 1.  
32  
33  
34  
35  
36  
37  
38  
39

### 40 **HRCT examination, assessment, and scoring**

41  
42 All patients underwent whole lung volumetric HRCT scanning of the chest on the day  
43  
44 of diagnosis of ARDS using a multidetector-row CT (MDCT) scan. All MDCT scans  
45  
46 were obtained with 2-mm thickness and 15-mm table speed per rotation and were  
47  
48 performed at full inspiration from the lung apex to base. Contiguous CT slices were  
49  
50 reconstructed using of a high-spatial frequency algorithm. Sections were displayed at  
51  
52 10-mm intervals throughout the chest with the patient in the supine position and without  
53  
54  
55  
56  
57  
58  
59  
60

1  
2  
3  
4  
5  
6 intravenous contrast medium. The process did not negatively affect the patients'  
7  
8  
9 condition. In this study, we evaluated single CT scan acquired at day one of the ARDS  
10  
11 diagnosis, because sequential CT scans were hard to be performed after high positive  
12  
13 end-expiratory pressure ventilation was introduced. HRCT scans were evaluated on the  
14  
15 day of ARDS diagnosis by two independent observers (K.Fujimoto. and T.J.) who were  
16  
17 chest radiologists with 23 and 20 years of experience, respectively, and were unaware of  
18  
19 patient condition. The presence and extent of areas of ground-glass attenuation,  
20  
21  
22 air-space consolidation, traction bronchiectasis, traction bronchiolectasis, and  
23  
24  
25 honeycombing were assessed. Ground-glass attenuation was defined as a hazy area with  
26  
27 increased opacification without obscuration of underlying vascular markings. Air-space  
28  
29 consolidation was considered present when the vascular markings were obscured. When  
30  
31 bronchi were irregular in contour, the dilated bronchus within areas of parenchymal  
32  
33 abnormality was recognized as traction bronchiectasis. Traction bronchiolectasis was  
34  
35 identified by the presence of dilated bronchioles within areas with parenchymal  
36  
37 abnormality. Honeycombing was defined as the presence of cystic airspaces measuring  
38  
39  
40  
41  
42  
43  
44  
45  
46 2-10 mm in diameter with well-defined walls.

47  
48 HRCT findings were graded on a scale of 1-6 based on the classification  
49  
50 system correlating with previously described pathology (Fig. 2) <sup>14,16</sup>: 1, normal  
51  
52 attenuation; 2, ground-glass attenuation; 3, consolidation; 4, ground-glass attenuation  
53  
54 with traction bronchiolectasis or bronchiectasis; 5, consolidation with traction  
55  
56  
57  
58  
59  
60

1  
2  
3  
4  
5  
6 bronchiolectasis or bronchiectasis; 6, honeycombing. The presence of each of these six  
7  
8  
9 abnormalities was assessed independently in three (upper, middle, lower) zones of each  
10  
11 lung. The upper zone was defined as the area above the level of the carina, the middle  
12  
13 zone as the area between the level of the carina and that of the infrapulmonary vein, and  
14  
15 the lower zone as the area below the level of the infrapulmonary vein. The extent of  
16  
17 each abnormality was determined by visually estimating the percentage (to the nearest  
18  
19 10%) of the affected lung parenchyma in each zone. The assessments of the two  
20  
21 observers were averaged. The abnormality score for each zone was calculated by  
22  
23 multiplying the percentage area by the point value (1-6). The six zone scores were  
24  
25 averaged to determine the total score for each abnormality in each patient. The overall  
26  
27 CT score for each patient was obtained by adding the six averaged scores. The scoring  
28  
29 system is previously reported<sup>14,16</sup> and has been evaluated in the other diseases<sup>18,19</sup>.

### 37 38 **Treatment Protocol**

39  
40 All patients underwent a common intensive treatment according to the  
41  
42 domestic clinical practical guidelines<sup>20-24</sup>. Antibiotic therapy was performed by these  
43  
44 guidelines, which were referenced to the American Thoracic Society/Infectious  
45  
46 Diseases Society of America Consensus Guidelines on the management of  
47  
48 community-acquired pneumonia in immunocompetent adults.<sup>25,26</sup>

49  
50  
51  
52  
53 **While there is contradicting reports for a survival benefit, all randomized**  
54  
55 **trials have shown a significant reduction in duration of mechanical ventilation<sup>27-30</sup>.**  
56  
57  
58  
59  
60



1  
2  
3  
4  
5  
6 When this study protocol was made, the efficacy of prolonged corticosteroids to the  
7  
8 fibroproliferative ARDS had been reported in a small randomized control study<sup>30</sup>. In the  
9  
10 current study, we examined the relationship between the efficacy of steroids and the  
11  
12 extent of fibroproliferation on HRCT scans. According to our previous study<sup>16</sup>, early  
13  
14 fibroproliferation on HRCT scans was observed in 64 % of 44 patients with ARDS.  
15  
16 Therefore, we started corticosteroid therapy after performing HRCT scans at the  
17  
18 diagnosis of ARDS. Initial administration of methylprednisolone with a moderate dose  
19  
20 (2 mg/kg/day) (n = 71) or high-dose (1000 mg/day for three days followed by a  
21  
22 moderate dose) (n = 14) was introduced and was gradually tapered over one month  
23  
24 according to the previous study<sup>30</sup>. Ventilator management and ventilator weaning was  
25  
26 introduced by the evidence-based guidelines<sup>23, 24</sup> with reference to the lower tidal  
27  
28 volume ( $V_T$ ) strategy (6 ml/kg predicted body weight (PBW) <  $V_T$  < 10 ml/kg PBW) in  
29  
30 the ARDS Clinical Trial<sup>31</sup> and to the guidelines for weaning and discontinuing  
31  
32 ventilatory support from the American College of Chest Physicians<sup>32</sup>.  
33  
34  
35  
36  
37  
38  
39  
40  
41  
42

### 43 **Screening of ventilator associated outcomes**

44  
45 For each patient, we recorded the number of ventilator-free days. Barotrauma,  
46  
47 defined as any new pneumothorax, pneumomediastinum, or subcutaneous emphysema,  
48  
49 was noted as present or absent on routine chest radiographs or chest tube insertions for  
50  
51 known or suspected spontaneous pneumothorax during the first 28 days<sup>33</sup>.  
52  
53  
54

55  
56 Ventilator associated pneumonia (VAP) surveillance was incorporated into the  
57  
58  
59  
60

1  
2  
3  
4  
5  
6 routine examinations of cultures of sputum obtained using a sterile intratracheal suction  
7  
8 tube<sup>34</sup>. VAP was defined as pneumonia occurring after more than 48 hours of  
9  
10 mechanical ventilation and for up to 72 hours after weaning.  
11  
12

### 13 14 **Organ or system failure**

15  
16 Patients were monitored daily for 28 days for signs of the failure of  
17  
18 extrapulmonary organs and systems according to the ARDS Clinical Trial<sup>31</sup>. The  
19  
20 number of days without organ or system failure was calculated by subtracting the  
21  
22 number of days with organ failure from the lesser of 28 days or the number of days to  
23  
24 death. The Sequential Organ Failure Assessment (SOFA) score was sequentially  
25  
26 monitored at Day 7 and 14, except for patients who died within 7 days or 14 days.  
27  
28  
29  
30  
31

### 32 **Outcome measurements**

33  
34  
35 **The primary outcome was mortality 60 days after ARDS diagnosis. Patients**  
36  
37 **discharged from the hospital while alive for 60 days were defined as survivors.**

38  
39  
40 **Their prognoses were eventually followed until 180 days.** Non-survivors were  
41  
42 defined as patients who died in the hospital. Secondary outcome variables included the  
43  
44 number of ventilator-free days, organ failure-free days, the incidence of barotraumas,  
45  
46 and the occurrence of ventilator-associated pneumonia.  
47  
48  
49

### 50 **Statistical analysis**

51  
52  
53 Cox proportional hazards regression analysis was used to examine the influence on  
54  
55 survival of 10 % change of radiologically fibroproliferation on HRCT while adjusting  
56  
57  
58  
59  
60

1  
2  
3  
4  
5  
6 for other prognostic clinical factors such as age, severity of illness, non-pulmonary  
7  
8 organ dysfunctions, that had been reported<sup>35-37</sup>. Multivariate regression analysis was  
9  
10 also performed to assess the impact on ventilator-weaning failure within 28 days, an  
11  
12 incidence of barotraumas, and ventilator-associated pneumonia. To analyze the CT  
13  
14 score as a predictor of survival, or of the failure of ventilator weaning or of the  
15  
16 occurrence of barotrauma within 28 days after the onset of ARDS, we used  
17  
18 receiver-operator characteristic (ROC) curves and the corresponding area under the  
19  
20 curve (AUC) to evaluate how the prediction model performed on the test data and to  
21  
22 determine the cutoff value of the CT score yielding the highest sensitivity and  
23  
24 specificity which were determined by the Youden index (i.e., sensitivity + specificity –  
25  
26 1). Statistical analyses were performed by using the SPSS package (version 18.0J; SPSS,  
27  
28 Tokyo, Japan). For all statistical analyses,  $p < 0.05$  was considered significant.  
29  
30  
31  
32  
33  
34  
35  
36  
37  
38  
39  
40  
41  
42  
43  
44  
45  
46  
47  
48  
49  
50  
51  
52  
53  
54  
55  
56  
57  
58  
59  
60

## RESULTS

### Baseline clinical characteristics

Non-survivors had more severe lung injury with fibroproliferative changes on HRCT scan as shown by their higher HRCT scores than survivors, although non-survivors tended to have less severe multiorgan failure as expressed by their lower SOFA scores. No significant differences were seen between survivors and non-survivors in the number of a history of cigarette smoking and a presence of emphysema. No significant differences were also observed in the ventilatory and medicational conditions as well (Table 1).

### HRCT findings for survivors and non-survivors

The area of increased attenuation associated with traction bronchiolectasis or bronchiectasis, indicative of radiologically fibroproliferation, was observed in 40 (47%) of 85 patients at presentation and was significantly smaller in survivors than in non-survivors (Table 2), whereas the area of increased attenuation without traction bronchiolectasis or bronchiectasis was greater in survivors than in non-survivors. Interobserver variability in evaluation of the presence of lung abnormalities was good (kappa, 0.63-0.83), and the assessments of the extent of abnormality by two different observers also correlated well (Spearman rank correlation coefficient, 0.72;  $p < 0.01$ ).

### Prognostic value of the HRCT score

The overall HRCT score of survivors (median  $\pm$  SD, 195.7  $\pm$  53.7; range,

1  
2  
3  
4  
5  
6 133.4-325.0) was significantly smaller than that of non-survivors ( $233.1 \pm 46.2$ ;  
7  
8 174.8-384.8). Construction of a ROC curve yielded an optimal cut-off value of the  
9  
10 HRCT score of 210 which was determined for prediction of survival at Day 60 with  
11  
12 71 % sensitivity of and 72 % specificity (AUC, 0.71; 95% confidence interval (CI),  
13  
14 0.61-0.82) and for prediction of survival at Day 180 with 71 % sensitivity and 76 %  
15  
16 specificity (AUC, 0.73; 95% CI, 0.62-0.84) (Fig. 3). A significant difference was  
17  
18 observed in the 60-day mortality rate between patients with CT score < 210 and those  
19  
20 with CT score  $\geq$  210 ( $p < 0.0001$ ) as well as in the ventilator-free days at day 28 ( $p <$   
21  
22 0.0001) (Table 3). The difference in the 60-day mortality rate between patients with  
23  
24 more or less fibroproliferative changes on HRCT scan persisted regardless of causes of  
25  
26 ARDS (Fig. 4). Multivariate Cox proportional hazards model with adjustment for  
27  
28 demographic characteristics, severity of illness, non-pulmonary organ dysfunctions, and  
29  
30 HRCT score at diagnosis, the HRCT score remained an independent risk factor for  
31  
32 mortality (hazard ratio 1.20; 95% confidence interval 1.06, 1.36;  $p = 0.005$ ) when  
33  
34 expressed as mortality change per 10% increase in the area of attenuation with traction  
35  
36 bronchiolectasis or bronchiectasis on HRCT scans (Table 4).  
37  
38  
39  
40  
41  
42  
43  
44  
45  
46  
47

48 **Relation between the HRCT score and the number of ventilator-free days, and the**  
49 **number of organ-failure-free days and sequential changes of SOFA score**  
50

51 An ROC curve determined the best cut-off value of the CT score of 210 for  
52  
53 prediction of ventilator-weaning failure within 28 days with 75 % sensitivity and 76 %  
54  
55  
56  
57  
58  
59  
60

1  
2  
3  
4  
5  
6 specificity (AUC, 0.77; 95% CI, 0.67-0.88) (Fig. 5a). Regardless of significantly higher  
7  
8 SOFA score ( $8.0 \pm 3.0$  versus  $5.0 \pm 2.0$ ;  $p < 0.0001$ ) and higher DIC score ( $2.8 \pm 1.5$   
9  
10 versus  $1.9 \pm 1.8$ ;  $p < 0.002$ ) at diagnosis, patients with a CT score of  $< 210$  had a  
11  
12 significantly higher number of ventilator-free days ( $14.0 \pm 7.8$  versus  $5.2 \pm 8.0$  days;  $p <$   
13  
14  $0.0001$ ). Those patients with a lower CT score were associated with less severe  
15  
16 subsequent multiorgan failure as shown by a significantly higher number of  
17  
18 organ-failure-free days (Table 3) and by significant decrease of sequential SOFA score  
19  
20 than that of patients with a higher CT score (Fig.7). Multivariate regression analysis,  
21  
22 with adjustment for demographic characteristics, general severity, and occurrence of  
23  
24 barotraumas, showed that the CT score was independently associated with  
25  
26 ventilator-weaning within 28 days with an odds ratio of 0.63 when expressed as  
27  
28 weaning failure change per 10% increase in the area of attenuation with traction  
29  
30 bronchiolectasis or bronchiectasis on HRCT scans ( $p = 0.0006$ ) (Table 5a).  
31  
32  
33  
34  
35  
36  
37  
38  
39

#### 40 **Relation between the HRCT score and the incidence of barotraumas or** 41 42 **ventilator-associated pneumonia** 43 44

45 All eleven patients with barotrauma had pneumothorax. Barotrauma occurred  
46  
47 3-28 days (mean  $\pm$  SD,  $12.7 \pm 9.4$  days) after ARDS onset. An ROC curve identified the  
48  
49 optimal cutoff value of the CT score of 235 for prediction of barotrauma onset with  
50  
51 73 % sensitivity and 77 % specificity (AUC, 0.77; 95% CI, 0.59-0.95) (Fig. 6a).  
52  
53  
54  
55  
56 Patients with the CT score  $< 235$  had a significantly lower incidence of barotrauma (5.0  
57  
58  
59  
60

1  
2  
3  
4  
5  
6 versus 32.0 %;  $p = 0.0019$ ) within 28 days after the onset of ARDS than those with CT  
7  
8 score of  $\geq 235$  (Fig. 5b). The CT score was also independently associated with the  
9  
10 occurrence of barotraumas with an odds ratio of 1.61 by multivariate regression analysis  
11  
12 ( $p = 0.018$ ) (Table 6b). Ventilator-associated pneumonia (VAP) was documented in 36  
13  
14 patients (42.3%) after day 5 since ARDS onset. The percentage of patients complicated  
15  
16 with VAP in the higher CT score group tended to be higher than those in the lower CT  
17  
18 score groups (51.4 and 35.4 percent, respectively;  $p = 0.14$ ). Multivariate analysis also  
19  
20 demonstrated that the CT score was independently associated with the complication of  
21  
22 VAP with an odds ratio of 1.46 ( $p = 0.0041$ ) (Table 5c).  
23  
24  
25  
26  
27  
28  
29  
30  
31  
32  
33  
34  
35  
36  
37  
38  
39  
40  
41  
42  
43  
44  
45  
46  
47  
48  
49  
50  
51  
52  
53  
54  
55  
56  
57  
58  
59  
60

## DISCUSSION

Regardless of the cause of ARDS, we found the extent of fibroproliferative changes on HRCT at diagnosis of ARDS was an independent predictive factor for survival and ventilator dependency. Furthermore, patients with extensive fibroproliferative changes on HRCT scan were more susceptible to associated multiorgan failure, barotraumas and ventilator-associated pneumonia than those with less extensive changes.

Semi-quantitative determination of fibroproliferation by means of HRCT assessment was informative with regard to the potential not only for response to treatment but also for susceptibility to subsequent ventilator-associated outcomes (ventilator dependency, barotraumas, and ventilator-associated pneumonia).

Biochemical evidence of fibroproliferation is present early in the acute lung injury process. N-terminal procollagen peptide III (N-PCP-III) is a marker of collagen turnover and is elevated in bronchoalveolar lavage (BAL) fluid and tracheal aspirate from ARDS patients within 24 h of diagnosis<sup>8-11</sup>. The increased N-PCP-III concentration in BALF at diagnosis was associated with poor prognosis, suggesting that pulmonary early fibroproliferation is an important determinant of outcome<sup>8-11</sup>. In the present study, traction bronchiectasis within areas of increased attenuation, suggesting radiologically fibroproliferation, was already detectable on HRCT scans obtained on the day of ARDS onset in 40 patients (47%). We also confirmed that HRCT findings of early and late phase of ARDS frequently overlapped. These results supported the



1  
2  
3  
4  
5  
6 previous reports and suggested that a clinically early time point does not necessarily  
7  
8 correspond to a pathologically early phase of ARDS. Given that no significant  
9  
10 difference in the cause of ARDS was apparent between the survivors and non-survivors  
11  
12 in this study, no correlation between the HRCT score and the clinical duration of ARDS  
13  
14 may also be attributable to differences in individual sensitivity to lung injury and in the  
15  
16 intensity of the consequent exaggerated inflammation that occurs between the onset of  
17  
18 injury and progression to ARDS. The term “fibroproliferative” ARDS may not  
19  
20 necessarily apply only to “late phase” ARDS but possibly also to “early phase”.  
21  
22 Accordingly, extent of fibroproliferative changes on HRCT scan, together with  
23  
24 N-PCP-III concentration in BALF, may be a potential clue to differentiate “real” late  
25  
26 ARDS from the early one.  
27  
28  
29  
30  
31  
32  
33  
34

35 Currently, there have been few prospective clinical studies to validate the  
36  
37 susceptibility to ventilator-associated outcomes. The ARDS Network low tidal  
38  
39 volume study has suggested that excessive large tidal ventilation induces  
40  
41 inflammatory cytokines and is associated with a known risk factor for ventilator  
42  
43 associated lung injury<sup>31</sup>. In the present study, patients with extensive  
44  
45 fibroproliferation shown as higher HRCT score on the day of ARDS onset needed a  
46  
47 longer duration of mechanical ventilation with subsequent ventilator-associated  
48  
49 pneumonia and had shorter organ-failure free days, and subsequently suffered from  
50  
51 multiple organ failure.  
52  
53  
54  
55  
56  
57  
58  
59  
60

1  
2  
3  
4  
5  
6 Barotraumas occurring in critically ill patients independently affects intensive care  
7  
8 unit mortality<sup>38</sup>. Barotrauma events occur late in the course of ARDS and are related to  
9  
10 lung structural changes such as cystic or fibroproliferative lesions that develop over  
11  
12 time<sup>39</sup>. In our study, barotrauma occurred more than 10 days (mean  $\pm$  SD, 12.7  $\pm$  9.4  
13  
14 days) after the onset of ARDS and was more frequent in patients with a higher HRCT  
15  
16 score (score  $\geq$  235) than in those with a lower HRCT score (score  $<$  235) during the first  
17  
18 28 days. Given that a higher HRCT score at diagnosis suggests advanced  
19  
20 fibroproliferation, our data support the relationship between pulmonary  
21  
22 fibroproliferation and its susceptibility to barotraumas.  
23  
24  
25  
26  
27  
28

29  
30 Ventilator-associated pneumonia (VAP) has been a causative factor of subsequent  
31  
32 systemic inflammatory syndrome resulting in multi-organ failure<sup>33</sup>. The risk of VAP  
33  
34 increases with prolonged mechanical ventilation<sup>34</sup>. **Furthermore, sustained and**  
35  
36 **intense inflammatory responses in unresolving ARDS increase intracellular and**  
37  
38 **extra-cellular growth of nosocomial pathogens and increase the risk for nosocomial**  
39  
40 **infections**<sup>40</sup>. More extensive fibroproliferative changes on HRCT scan shown as a  
41  
42 higher CT score were associated with a longer ventilator dependency that was more  
43  
44 susceptible to VAP onset. These results support that pulmonary fibroproliferation of  
45  
46 ARDS increases risk for ventilator dependency and its associated complications.  
47  
48  
49  
50

51  
52  
53 In a previous study of 45 cases of ARDS confirmed at biopsy, patients whose  
54  
55 conditions were shown histologically to be in the acute exudative phase had a better  
56  
57  
58  
59  
60

1  
2  
3  
4  
5  
6 prognosis than did those whose condition was shown to be in the fibroproliferative  
7  
8 phases<sup>41</sup>. Persistent dysregulated systemic inflammation leading to maladaptive lung  
9  
10 repair results in pulmonary fibroproliferation and progression of extrapulmonary organ  
11  
12 dysfunction<sup>5</sup>. Prolonged corticosteroid therapy attenuates systemic inflammation and  
13  
14 reduced duration of mechanical ventilation<sup>5</sup>. In our study, the group of patients who had  
15  
16 less fibroproliferative changes on HRCT scans (HRCT score, < 210) showed lower  
17  
18 mortality and more ventilator-free days than those who had more extensive areas of  
19  
20 fibroproliferation (HRCT score,  $\geq$  210). This may suggest a relationship between the  
21  
22 pathologic phases of ARDS and responsiveness to treatment. **When more extensive**  
23  
24 **and rapidly progressive pulmonary fibroproliferation resulting from intense**  
25  
26 **exaggerated systemic inflammation at presentation occurs, even prolonged**  
27  
28 **corticosteroid therapy may not be effective.** Whether the patients with  
29  
30 fibroproliferative predominance have different treatment strategies compared to those  
31  
32 with exudative predominance has been a vexing question<sup>4</sup>. Improving our  
33  
34 understanding of disease state and evolution of the disease may be key to the  
35  
36 development of the optimal therapy and their timing. A method that could be used to  
37  
38 evaluate and calibrate the clinical to pathologic stages may help prognosticate, alter  
39  
40 supportive or therapeutic approach to ARDS such as ventilator management and define  
41  
42 the treatment window for those interventions. Further prospective studies are needed to  
43  
44 examine the efficacy of the drugs such as corticosteroids according to the extent of  
45  
46  
47  
48  
49  
50  
51  
52  
53  
54  
55  
56  
57  
58  
59  
60

1  
2  
3  
4  
5  
6 fibroproliferation on HRCT scans.  
7

8  
9       There were some potential limitations. First, our study included few patients with  
10  
11 ARDS caused by major trauma, multiple transfusion and others, although it included  
12  
13 approximately 90% of the patients who had ARDS caused by three major etiologies  
14  
15 (pneumonia, aspiration, sepsis) of ARDS; thus, our study may not sufficiently reflect all  
16  
17 forms of ARDS. However, previous large randomized control studies also included  
18  
19 more than 70% of patients with these three etiologies<sup>27,31</sup>. Therefore, our results may  
20  
21 be applicable to most forms of ARDS.  
22  
23  
24  
25

26  
27       Second, many elderly patients (mean age, 75.0 years) were included. Clinically,  
28  
29 elderly ARDS patients show higher morbidity and need longer duration of mechanical  
30  
31 ventilation with subsequent poorer prognosis than the younger patients<sup>2,37</sup>. The  
32  
33 age-related differences in mortality and outcomes have been considered to be due to the  
34  
35 greater number of comorbid illness and higher frequency of non-pulmonary organ  
36  
37 system failure in older patients<sup>37</sup>. In this study, preexisting pulmonary emphysema was  
38  
39 seen in 32 (38 %) of 85 patients. Although no significant differences were seen between  
40  
41 survivors and non-survivors in the number of a history of cigarette smoking and a  
42  
43 presence of emphysema, we could not evaluate the severity of emphysema before the  
44  
45 onset of ARDS. Such a smoking-induced chronic lung disease could potentially affect  
46  
47 ventilator-dependency or prognosis. Although it was problematic whether aging  
48  
49 increase susceptibility to lung injury and to pulmonary fibroproliferation, further  
50  
51  
52  
53  
54  
55  
56  
57  
58  
59  
60

1  
2  
3  
4  
5  
6 investigation of younger patients with ARDS is needed to confirm the consistency of  
7  
8 the results of our study.  
9

10  
11 Third, no correlation was provided with either clinical parameters or pathologic  
12  
13 findings in the present study. Further investigation is necessary to compare HRCT  
14  
15 findings with other predictors of morbidity/mortality-i.e. inflammatory biomarkers such  
16  
17 as serum IL-6 or BAL PCP III levels. Recent studies of biopsy findings from ARDS  
18  
19 patients have reported the pathologic diversity and only half proportion of typical  
20  
21 diffuse alveolar damage<sup>6,7</sup>. Regardless of the cause or pathology of ARDS, our study  
22  
23 highlighted the extent of lung architectural distortion (areas with traction  
24  
25 bronchiectasis) indicating that pulmonary fibroproliferation on HRCT scans. Although  
26  
27 fibroproliferative ARDS does not warrant different treatment strategies up to the present,  
28  
29 prospective evaluation of HRCT findings in patients with ARDS would help therapeutic  
30  
31 implications in the development of treatment strategies based on the extent of  
32  
33 fibroproliferation, as well as its prognostic implications.  
34  
35  
36  
37  
38  
39  
40  
41  
42

43 Fourth, when using our cutoff values of HRCT scores, there were approximately  
44  
45 30 % of our patients who did not fit for prediction of poor prognosis or ventilator  
46  
47 dependency. Recently, multiple organ failure in ARDS patients is considered to be either  
48  
49 as the predisposing condition or as a consequence of ARDS<sup>42</sup>. If ARDS occurs as one of  
50  
51 multiple organ failure, even though pulmonary fibroproliferation was mild,  
52  
53 extra-pulmonary dysfunction could be the determinant of the outcome.  
54  
55  
56  
57  
58  
59  
60

1  
2  
3  
4  
5  
6 On the basis of our results, extensive HRCT abnormalities indicative of  
7  
8 fibroproliferative changes on the day of ARDS diagnosis were independently predictive  
9  
10 of poor prognosis and prolonged mechanical ventilation, and were also associated with  
11  
12 of poor prognosis and prolonged mechanical ventilation, and were also associated with  
13  
14 subsequent multiple organ failure. Pulmonary fibroproliferation that occurs early in  
15  
16 ARDS patients increases mortality risk by increasing susceptibility to ventilator  
17  
18 dependency and its associated complications.  
19  
20  
21  
22  
23  
24  
25  
26  
27  
28  
29  
30  
31  
32  
33  
34  
35  
36  
37  
38  
39  
40  
41  
42  
43  
44  
45  
46  
47  
48  
49  
50  
51  
52  
53  
54  
55  
56  
57  
58  
59  
60

## ACKNOWLEDGEMENTS

**Author contributions:** Dr Suga takes full responsibility for the integrity of all the data and the accuracy of the data analysis.

Dr Ichikado: contributed to designing the study, collecting the data, analyzing the data, and writing the manuscript.

Dr Muranaka: contributed to collecting data, analyzing the data, and revising the manuscript.

Dr Gushima: contributed to collecting data, analyzing the data, and revising the manuscript.

Dr Kotani: contributed to analyzing the data and revising the manuscript.

Dr Habashi: contributed to reanalyzing the data and revising the manuscript.

Dr Fujimoto: contributed to reanalyzing the data and revising the manuscript.

Dr Johkoh: contributed to reanalyzing the data and revising the manuscript.

Dr Iwamoto: contributed to collecting the data and revising the manuscript.

Dr Kawamura: contributed to collecting the data and revising the manuscript.

Dr Nagano: contributed to collecting the data and revising the manuscript.

Dr Fukuda: contributed to collecting the data and revising the manuscript.

Dr Hirata: contributed to collecting the data and revising the manuscript.

Dr Yoshinaga: contributed to reanalyzing the data and revising the manuscript.

Dr Ichiyasu: contributed to collecting the data and revising the manuscript.

Dr Tsumura: contributed to collecting the data and revising the manuscript.

Dr Kohrogi: contributed to reanalyzing the data and revising the manuscript.

Dr Kawaguchi: contributed to reanalyzing the data and revising the manuscript.

Dr Yoshioka: contributed to reanalyzing the data and revising the manuscript.

Dr Sakuma: contributed to reanalyzing the data and revising the manuscript.

**Other persons contributing to this study:** We appreciate Michael A. Matthay, MD<sup>1</sup>, and

Hiroshi Kubo, MD, PhD<sup>2</sup> for their editorial assistance and also thank Isamu Cho, MD, PhD<sup>3</sup>,

Tomoki Tanaka, MD<sup>3</sup>, Junichi Maehara, MD<sup>4</sup>, Shigeo Hiroshige, MD<sup>5</sup>, Makoto Takaki, MD<sup>5</sup>,

Mitsuko Honda, MD<sup>5</sup>, Naoko Arakawa, MD<sup>5</sup>, Yuko Yasuda, MD<sup>5</sup>, Makiko Takeguchi, MD<sup>5</sup>,

Aoi Teruya, MD<sup>5</sup>, Yoshitomo Eguchi, MD<sup>5</sup>, Naoki Shingu, MD<sup>5</sup>, Yoshihiko Sakata, MD<sup>5</sup>, and

Azusa Katsume, MD<sup>5</sup> for their clinical assistance.

1) Departments of Medicine and Anesthesia, University of California, San Francisco, CA, USA

2) Department of Geriatric and Respiratory Medicine, Tohoku University School of Medicine, Tohoku

1  
2  
3  
4  
5  
6  
7  
8  
9  
10  
11  
12  
13  
14  
15  
16  
17  
18  
19  
20  
21  
22  
23  
24  
25  
26  
27  
28  
29  
30  
31  
32  
33  
34  
35  
36  
37  
38  
39  
40  
41  
42  
43  
44  
45  
46  
47  
48  
49  
50  
51  
52  
53  
54  
55  
56  
57  
58  
59  
60

University, Sendai City, Miyagi, Japan

3) Department of Emergency and Critical Care Medicine, Saiseikai Kumamoto Hospital, Kumamoto, Japan

4) Pulmonary Division, Kumamoto City Hospital, Kumamoto City, Japan

5) Division of Respiratory Medicine, Saiseikai Kumamoto Hospital, Kumamoto, Japan

For peer review only



**Table 1.** Clinical characteristics of patients on the day of ARDS onset

| Characteristic                                   | Total<br>(n = 85) | 60 days               |                                       | p value |
|--------------------------------------------------|-------------------|-----------------------|---------------------------------------|---------|
|                                                  |                   | Survivors<br>(n = 54) | Outcomes<br>Non-survivors<br>(n = 31) |         |
| Age (years)*                                     | 75 ± 10           | 75 ± 11               | 76 ± 10                               | 0.60    |
| Sex (M/F)                                        | 51/34             | 30/24                 | 21/10                                 | 0.38    |
| Cigarette smoking                                | 33                | 17                    | 16                                    | 0.11    |
| Presence of emphysema                            | 32                | 18                    | 14                                    | 0.39    |
| Liver cirrhosis (%)                              | 6 (7.1)           | 4 (7.4)               | 2 (6.5)                               | > 0.99  |
| Direct/indirect injury                           | 59/26             | 38/16                 | 21/10                                 | 0.81    |
| PaO <sub>2</sub> :FiO <sub>2</sub>               | 96.2 ± 45.6       | 96.5 ± 45.0           | 96.2 ± 47.5                           | 0.90    |
| Causes of lung injury                            |                   |                       |                                       |         |
| Pneumonia (%)                                    | 32 (37.6)         | 20                    | 12                                    | > 0.99  |
| Sepsis (%)                                       | 24 (28.2)         | 13                    | 11                                    | 0.38    |
| Pulmonary (%)                                    | 11 (12.9)         | 5                     | 6                                     | 0.20    |
| Extrapulmonary (%)                               | 13 (15.2)         | 8                     | 5                                     | > 0.99  |
| Aspiration (%)                                   | 22 (25.9)         | 16                    | 6                                     | 0.44    |
| Others (%)                                       | 7 (8.2)           | 5                     | 2                                     | > 0.99  |
| Lung injury score*                               | 3.2 ± 0.5         | 3.3 ± 0.5             | 3.3 ± 0.5                             | 0.88    |
| APACHE II score                                  | 21.0 ± 4.7        | 21.0 ± 4.6            | 22.0 ± 4.9                            | 0.76    |
| SOFA score                                       | 7.0 ± 2.8         | 7.0 ± 2.8             | 6.0 ± 2.9                             | 0.15    |
| McCabe score (1/2/3)                             | 78/5/2            | 49/4/1                | 29/1/1                                | > 0.99  |
| DIC score*#                                      | 2.4 ± 1.7         | 2.4 ± 1.7             | 2.5 ± 1.6                             | 0.68    |
| White blood cell count<br>(per mm <sup>3</sup> ) | 10600 ± 6788      | 10600 ± 6178          | 10600 ± 7839                          | 0.63    |

|                                              |             |             |             |        |
|----------------------------------------------|-------------|-------------|-------------|--------|
| C-reactive protein (CRP)<br>(mg/dl)          | 15.4 ± 10.3 | 15.4 ± 9.6  | 16.1 ± 11.5 | 0.69   |
| Albumin (g/dl)                               | 3.0 ± 0.5   | 3.1 ± 0.5   | 2.8 ± 0.5   | 0.11   |
| Lactate dehydrogenase<br>(LDH) (IU/L)        | 308 ± 185   | 301 ± 147   | 339 ± 235   | 0.29   |
| Platelet count (per mm <sup>3</sup> )        | 20.1 ± 10.7 | 20.7 ± 11.0 | 18.9 ± 10.3 | 0.94   |
| Days of CT scanning<br>from ARDS onset (day) | 1.0 ± 0.0   | 1.0 ± 0.0   | 1.0 ± 0.0   | > 0.99 |
| HRCT score #                                 | 207 ± 53    | 196 ± 54    | 233 ± 46    | 0.001  |
| Initial steroid therapy                      |             |             |             |        |
| High dose                                    | 14          | 7           | 7           | 0.36   |
| Low dose                                     | 71          | 47          | 24          | 0.36   |
| Ventilatory variables                        |             |             |             |        |
| Tidal volume, ml/kg<br>predicted body weight | 8.0 ± 0.8   | 8.0 ± 0.7   | 8.0 ± 0.9   | 0.54   |
| Plateau pressure, cmH <sub>2</sub> O         | 21.5 ± 4.2  | 21.0 ± 3.8  | 23.0 ± 4.7  | 0.34   |
| Initial PEEP, cmH <sub>2</sub> O             | 8.0 ± 3.4   | 8.0 ± 2.5   | 8.0 ± 4.3   | 0.18   |

Data are expressed as median ± standard deviation. \*Data are mean ± standard

deviation. The p values refer to comparisons between survivors and non-survivors.

# Score ≥ 4 defined as disseminated intravascular coagulation from scoring system for

The Japanese Association for Acute Medicine.

**Table 2.** Extent of each high-resolution CT finding in 60-days survivors and non-survivors of ARDS.

| CT Finding                                                                   | Survivors<br>(n = 54) | Non-survivors<br>(n = 31) | p value |
|------------------------------------------------------------------------------|-----------------------|---------------------------|---------|
| Spared area                                                                  | 37.0 ± 19.2           | 30.3 ± 14.9               | 0.15    |
| Ground-glass attenuation                                                     | 33.5 ± 22.9           | 30.0 ± 16.0               | 0.70    |
| Air-space consolidation                                                      | 17.5 ± 13.8           | 18.3 ± 19.3               | 0.72    |
| Total area without traction bronchiolectasis<br>or bronchiectasis            | 88.0 ± 22.0           | 78.2 ± 22.5               | 0.01    |
| Ground-glass attenuation plus traction<br>bronchiolectasis or bronchiectasis | 9.3 ± 17.8            | 16.6 ± 21.7               | 0.08    |
| Air-space consolidation plus traction<br>bronchiolectasis or bronchiectasis  | 2.4 ± 7.8             | 5.6 ± 10.3                | 0.01    |
| Honeycombing                                                                 | 0.0 ± 0.0             | 0.0 ± 0.0                 | NS      |
| Total area with traction bronchiolectasis<br>or bronchiectasis               | 11.8 ± 18.0           | 22.1 ± 24.3               | 0.01    |

Data are mean ± standard deviation of percentage of lung involvement.

NS = not significant

Mann-Whitney U test

**Table 3. Comparison of primary and secondary outcomes between the cut-off value showing extent of fibroproliferative changes on high-resolution CT at the onset of**

**ARDS**

| Variable                                   | High-Resolution Computed Tomographic<br>(CT) score |                   | p value  |
|--------------------------------------------|----------------------------------------------------|-------------------|----------|
|                                            | < 210<br>(n = 47)                                  | ≥ 210<br>(n = 38) |          |
| 60-Day mortality (%)                       | 19.1                                               | 57.9              | < 0.0001 |
| No. of hospital death                      | 9                                                  | 22                |          |
| Causes of death                            |                                                    |                   |          |
| Multiple organ failure                     | 8                                                  | 18                |          |
| Respiratory failure                        | 1                                                  | 4                 |          |
| No. of ventilator-free days at day 28      | 14.3 ± 7.6                                         | 5.1 ± 8.0         | < 0.0001 |
| No. of organ-failure-free days             |                                                    |                   |          |
| Cardiovascular failure                     | 22.4 ± 8.1                                         | 16.1 ± 10.9       | 0.009    |
| Coagulation abnormalities                  | 23.0 ± 8.9                                         | 17.8 ± 10.4       | 0.017    |
| Hepatic failure                            | 23.3 ± 8.2                                         | 19.6 ± 9.5        | 0.11     |
| Renal failure                              | 21.7 ± 10.9                                        | 19.6 ± 9.6        | 0.29     |
| No. of incidence of barotraumas (%)        | 3 (6.4)                                            | 8 (21.1)          | 0.056    |
| No. of ventilator-associated pneumonia (%) | 16 (34.0)                                          | 20 (52.6)         | 0.13     |

Plus-minus values are mean ± SD. Continuous variables with non-normal distribution

were compared with the use of Mann-Whitney U test and categorical variables with

Fisher's exact test.

**Table 4a. Univariate Cox regression analysis of variables potentially associated with mortality at day 180 in patients with ARDS.**

| Variable                                  | P value | Hazard ratio | 95% CI    |
|-------------------------------------------|---------|--------------|-----------|
| HRCT score                                | 0.0019  | 1.22*        | 1.08-1.38 |
| Age                                       | 0.5411  | 0.99         | 0.96-1.02 |
| Sepsis                                    | 0.4020  | 1.34         | 0.67-2.67 |
| APACHE II score                           | 0.6578  | 0.98         | 0.92-1.06 |
| SOFA score                                | 0.1724  | 0.92         | 0.82-1.04 |
| McCabe score                              | 0.9609  | 0.98         | 0.41-2.32 |
| PaO <sub>2</sub> / FiO <sub>2</sub> ratio | 0.6119  | 1.00         | 0.99-1.01 |
| Serum Albumin                             | 0.0982  | 0.57         | 0.30-1.11 |

**Table 4b. Multivariate Cox regression analysis of prognostic factors associated with mortality at day 180 in patients with ARDS**

| Variable      | P value | Hazard ratio | 95% CI    |
|---------------|---------|--------------|-----------|
| HRCT score    | 0.0051  | 1.20*        | 1.06-1.36 |
| Serum Albumin | 0.2618  | 0.67         | 0.33-1.36 |

Abbreviation: HRCT: high-resolution computed tomography

\*Expressed as mortality change per 10% increase in area of attenuation with traction bronchiectasis on high-resolution CT.

**Table 5. Multiple logistic regression analysis of variables potentially associated with ventilator-associated outcomes.**

**Table 5a. Ventilator-weaning within 28 days in patients with ARDS.**

| Variable      | P value | Odds ratio | 95% CI    |
|---------------|---------|------------|-----------|
| HRCT score    | 0.0006  | 0.63*      | 0.48-0.82 |
| Serum Albumin | 0.1727  | 2.09       | 0.72-6.03 |

Abbreviation: HRCT: high-resolution computed tomography

\*Expressed as mortality change per 10% increase in area of attenuation with traction bronchiectasis on high-resolution CT.

**Table 5b. The incidence of the Barotrauma**

| Variable      | P value | Odds ratio | 95% CI    |
|---------------|---------|------------|-----------|
| HRCT score    | 0.0183  | 1.61*      | 1.08-2.38 |
| APACHE II     | 0.4724  | 0.92       | 0.74-1.15 |
| SOFA score    | 0.9110  | 1.02       | 0.68-1.55 |
| Serum Albumin | 0.5156  | 0.53       | 0.08-3.65 |
| Serum LDH     | 0.0158  | 1.05       | 1.01-1.09 |

Abbreviation: HRCT: high-resolution computed tomography

\*Expressed as mortality change per 10% increase in area of attenuation with traction bronchiectasis on high-resolution CT.

**Table 5c. The complication of the Ventilator-associated pneumonia**

| Variable                                  | P value | Odds ratio | 95% CI      |
|-------------------------------------------|---------|------------|-------------|
| Liver cirrhosis                           | 0.0286  | 13.34      | 1.31-135.60 |
| HRCT score                                | 0.0041  | 1.46*      | 1.13-1.89   |
| PaO <sub>2</sub> / FiO <sub>2</sub> ratio | 0.0236  | 0.99       | 0.98-1.00   |

Abbreviation: HRCT: high-resolution computed tomography

\*Expressed as mortality change per 10% increase in area of attenuation with traction

bronchiectasis on high-resolution CT.

## FIGURE LEGENDS

Figure 1. Outlines of the study.

Figure 2. High-resolution computed tomography (CT) findings correlated with pathology

a.: High-resolution CT findings corresponding to exudative phase of ARDS. HRCT scan at the level of right middle lobe shows dependent airspace consolidation without traction bronchiectasis and nondependent areas of sparing. The patient was a 68-year-old man with ARDS due to *Streptococcus pneumoniae*.

b.: High-resolution CT findings corresponding to fibroproliferative phase of ARDS. HRCT scan at the level of right lower lobe shows extensive airspace consolidation and ground-glass attenuation associated with traction bronchiectasis (arrows). The patient was a 84-year-old woman with ARDS due to sepsis.

c.: High-resolution CT findings corresponding to fibrotic phase of ARDS. HRCT scan at the level of right inferior pulmonary vein shows extensive ground-glass attenuation associated with traction bronchiectasis (arrows), coarse reticulation and cystic changes (arrowheads). The patient was a 65-year-old woman with ARDS due to *viral pneumoniae*. (Sequential changes of HRCT findings were shown in the supplemental figure.)

Figure 3. Receiver operator characteristic (ROC) curve of prognostic value of the high-resolution computed tomography (HRCT) score. ROC identified the optimal cut-off value of 210 determined by the Youden Index for prediction of survival at Day 60 with 71 % sensitivity of and 72 % specificity (AUC, 0.71; 95% confidence interval, 0.61-0.82) and for prediction of survival at Day 180 with 71% sensitivity and 76 % specificity (AUC, 0.73; 95%CI, 0.62-0.84).



1  
2  
3  
4  
5  
6  
7  
8  
9  
10  
11  
12  
13  
14  
15  
16  
17  
18  
19  
20  
21  
22  
23  
24  
25  
26  
27  
28  
29  
30  
31  
32  
33  
34  
35  
36  
37  
38  
39  
40  
41  
42  
43  
44  
45  
46  
47  
48  
49  
50  
51  
52  
53  
54  
55  
56  
57  
58  
59  
60

Figure 4a. Day 60-mortality rate of each major cause of ARDS.

Figure 4b. Day 60-mortality rate compared between the optimal cut-off value of high-resolution computed tomography (HRCT) score in each cause. Regardless of the cause, the mortality rate of a patient with a lower CT score was significantly lower than that of a patient with a higher CT score.

Figure 5. Receiver operator characteristic (ROC) curve of prediction of the ventilator weaning within 28 days from high-resolution computed tomography (HRCT) score. ROC curve identified the optimal cut-off value of 210 determined by the Youden Index for prediction of ventilator weaning at day 28 with 75 % sensitivity and 76 % specificity (AUC, 0.77; 95%CI, 0.67-0.88).

Figure 6a. Receiver operator characteristic (ROC) curve of prediction of the onset of barotrauma from high-resolution computed tomography (HRCT) score. ROC curve identified the optimal cut-off value of 235 determined by the Youden Index for prediction of barotraumas onset with 73 % sensitivity and 77 % specificity (AUC, 0.77; 95%CI, 0.59-0.95)

Figure 6b. Comparison of the incidence of barotraumas between patients with the optimal cut-off value of CT score identified from ROC curve. The incidence of barotrauma of a patient with a lower CT score was significantly lower than that of a patient with a higher CT score.

Figure 7. Sequential changes of Sequential Organ Failure Assessment (SOFA) scores. The SOFA score of a patient with a lower CT score (< 210) significantly decreased from day 1 to day 14 ( $p = 0.0016$ ). The SOFA score of a patient of a patient with a higher CT

1  
2  
3  
4  
5 score ( $\geq 210$ ) significantly increased from day 1 to day 14 ( $p = 0.027$ ). Four patients  
6  
7 with a lower CT score ( $< 210$ ) and 9 patients with a higher CT score ( $\geq 210$ ) who died  
8  
9 within 14 days were excluded.  
10  
11  
12  
13  
14  
15  
16  
17  
18  
19  
20  
21  
22  
23  
24  
25  
26  
27  
28  
29  
30  
31  
32  
33  
34  
35  
36  
37  
38  
39  
40  
41  
42  
43  
44  
45  
46  
47  
48  
49  
50  
51  
52  
53  
54  
55  
56  
57  
58  
59  
60

For peer review only

**REFERENCES**

1. Ware LB, Matthay MA. The acute respiratory distress syndrome. *N Engl J Med* 2000;342:1334–1349
2. Bernard GR. Acute respiratory distress syndrome. A historical perspective. *Am J Respir Crit Care Med* 2005;172:798–806.
3. Tomashefski JF Jr. Pulmonary pathology of the adult respiratory distress syndrome. *Clin Chest Med* 1990;11:593-619.
4. Hudson LD, Hough CL. Therapy for late-phase acute respiratory distress syndrome. *Clin Chest Med* 2006; 27:671-677
5. **Meduri GU, Annane D, Chrousos GP, Marik PE, Sinclair SE. Activation and regulation of systemic inflammation in ARDS. Rationale for prolonged glucocorticoid therapy. *CHEST* 2009;136:1631-1643**
6. Patel SR, Karpaliotis D, Ayas NT, et al. The role of open-lung biopsy in ARDS. *Chest* 2004;125:197-202.
7. Papazian L, Doddoli C, Chetaille B, et al. A contributive results of open-lung biopsy improves survival in acute respiratory distress syndrome patients. *Crit Care Med* 2007; 35:755-762.
8. Clark JG, Milberg JA, Steinberg KP, Hudson LD. Type III procollagen peptide in the adult respiratory distress syndrome: association of increased peptide levels in bronchoalveolar lavage fluid with increased risk for death. *Ann Intern Med* 1995;122:17-23.
9. Chesnutt AN, Matthay MA, Tibayan FA, Clark JG. Early detection of type III procollagen peptide in acute lung injury: pathogenetic and prognostic significance. *Am J Respir Crit Care Med* 1997; 156:840-845.
10. Meduri GU, Tolley EA, Chinn A, Stentz F, Postlethwaite A. Procollagen type I and III aminoterminal propeptide levels during acute respiratory distress syndrome and in

1  
2  
3  
4  
5  
6 response to methylprednisolone treatment. *Am J Respir Crit Care Med*  
7  
8 1998;158:1432–1441.

9  
10 11. Marshall RP, Bellingan G, Webb S, et al. Fibroproliferation occurs early in the acute  
11  
12 respiratory distress syndrome and impacts on outcome. *Am J Respir Crit Care Med*  
13  
14 2000;162:1783–1788.

15  
16  
17 12. Ichikado K, Johkoh T, Ikezoe J, et al. Acute interstitial pneumonia: high-resolution  
18  
19 CT findings correlated with pathology. *Am J Roentgenol* 1997;168:333–338.

20  
21 13. Ichikado K, Suga M, Gushima Y, et al. Hyperoxia-induced diffuse alveolar damage  
22  
23 in pigs: correlation between thin-section CT and histopathologic findings. *Radiology*  
24  
25 2000;216:531–538.

26  
27  
28 14. Ichikado K, Suga M, Müller NL, et al. Acute interstitial pneumonia: comparison of  
29  
30 high-resolution computed tomography findings between survivors and non-survivors.  
31  
32 *Am J Respir Crit Care Med* 2002;165:1551–1556.

33  
34 15. Ichikado K. Permeability edema. In: Muller NL, Silva IS eds, *Imaging of the chest*,  
35  
36 Philadelphia: Saunders Elsevier, 2008; 964-977.

37  
38 16. Ichikado K, Suga M, Muranaka H, et al. Prediction of prognosis for acute  
39  
40 respiratory distress syndrome with thin-section CT: validation in 44 cases. *Radiology*  
41  
42 2006; 238:321-329.

43  
44 17. Bernard GR, Artigas A, Brigham KL, et al. The American-European Consensus  
45  
46 Conference on ARDS. Definitions, mechanisms, relevant outcomes, and clinical trial  
47  
48 coordination. *Am J Respir Crit Care Med* 1994;149:818–824.

49  
50 18. Fujimoto K, Taniguchi H, Johkoh T, et al. Acute exacerbation of idiopathic  
51  
52 pulmonary fibrosis: high-resolution CT scores predict mortality. *Eur Radiol* 2012  
53  
54 Jan;22(1):83-92. Epub 2011 Aug 7.

- 1  
2  
3  
4  
5  
6  
7  
8  
9  
10  
11  
12  
13  
14  
15  
16  
17  
18  
19  
20  
21  
22  
23  
24  
25  
26  
27  
28  
29  
30  
31  
32  
33  
34  
35  
36  
37  
38  
39  
40  
41  
42  
43  
44  
45  
46  
47  
48  
49  
50  
51  
52  
53  
54  
55  
56  
57  
58  
59  
60
19. Mukae H, Ishimoto H, Sakamoto N, et al. Clinical differences between interstitial lung disease associated with clinically amyopathic dermatomyositis and classic dermatomyositis. *CHEST* 2009;136:1341-1347.
  20. Committee for the Japanese Respiratory Society Guidelines for the Management of Respiratory Infections. Empiric treatment of community-acquired pneumonia in adults. *Respirology* 2006;11:S101-S101
  21. Committee for the Japanese Respiratory Society Guidelines for the Management of Respiratory Infections. Antibacterial therapy of hospital-acquired pneumonia. *Respirology* 2004; 9 (suppl):S16-24
  22. The Japanese Association for Infectious Diseases and The Japanese Society of Chemotherapy Guidelines for Antimicrobial Use (in Japanese). In: The Japanese Association for Infectious Diseases and The Japanese Society of Chemotherapy eds, Tokyo: Kyowakikaku, 2005; p84-88, p106-121.
  23. Committee for the Japanese Respiratory Society Guidelines for the Acute Lung Injury and Acute Respiratory Distress Syndrome (in Japanese). In: The Japanese Respiratory Society eds, Tokyo:Nankoudo, 2004;p33-47.
  24. Clinical practice guidelines for acute respiratory distress syndrome. *The Japanese Journal of Respiratory Care* 2004;21:44-61.
  25. American Thoracic Society. Guidelines for the management of adults with community-acquired pneumonia: diagnosis, assessment of severity, antimicrobial therapy, and prevention. *Am J Respir Crit Care Med* 2001; 163:1730-1754
  26. Mandell LA, Bartlett JG, Dowell SF, et al. Update of practice guidelines for management of community-acquired pneumonia in immunocompetent adults. Infectious Diseases Society of America. *Clin Infect Dis* 2003; 37:1405-1432
  27. Steinberg KP, Hudson LD, Goodman RB, et al. Efficacy and safety of

- 1  
2  
3  
4  
5 corticosteroids for persistent acute respiratory distress syndrome. *N Engl J Med*  
6 2006;354: 1671-1684  
7  
8  
9  
10 28. Peter JV, John P, Graham P, Moran JL, Geroge IA, Bersten A. Corticosteroids in the  
11 prevention and treatment of acute respiratory distress syndrome (ARDS) in adults:  
12 meta-analysis. *BMJ* 2008;336(7651):1006-1009  
13  
14 29. Tang BMP, Craig JC, Eslick GD, Seppelt I, McLean AS. Use of corticosteroids in  
15 acute lung injury and acute respiratory distress syndrome: a systemic review and  
16 meta-analysis. *Crit Care Med* 2009;37:1594-1603  
17  
18  
19  
20 30. Muduri GU, Headley AS, Golden E, et al. Effect of prolonged methylprednisolone  
21 therapy in unresolving acute respiratory distress syndrome. A randomized control trial.  
22 *JAMA* 1998;280:159-165  
23  
24  
25  
26 31. Ventilation with lower tidal volumes as compared with traditional tidal volumes for  
27 acute lung injury and the acute respiratory distress syndrome. The Acute Respiratory  
28 Distress Syndrome Network. *N Engl J Med* 2000; 342(18):1301-1308  
29  
30  
31  
32 32. Evidence-based guidelines for weaning and discontinuing ventilatory support.  
33 *CHEST* 2001;120:375S-395S  
34  
35  
36 33. Pinhu L, Whitehead T, Evans T, et al. Ventilator-associated lung injury. *Lancet*  
37 2003;361:332-340.24.  
38  
39  
40 34. Fagon JY, Chastre J, Domart Y, et al. Nasocomial pneumonia in patients receiving  
41 continuous mechanical ventilation. Prospective analysis of 52 episodes with use of a  
42 protected specimen brush and quantitative culture techniques. *Am Rev Respir Dis*  
43 1989;139:877-884.  
44  
45  
46 35. Monchi M, Bellenfant F, Cariou A, et al. Early predictive factors of survival in the  
47 acute respiratory distress syndrome. A multivariate analysis. *Am J Respir Crit Care Med*  
48 1998;158:1076-1081.  
49  
50  
51  
52 36. Ely EW, Wheeler AP, Thompson BT, et al. Recovery rate and prognosis in older  
53  
54  
55  
56  
57  
58  
59  
60

1  
2  
3  
4  
5  
6 persons who developed acute lung injury and the acute respiratory distress syndrome.

7  
8 *Ann Intern Med* 2002;136:25–36.

9  
10 37. Estenssoro E, Dubin A, Laffaire E, *et al.* Incidence, clinical course, and outcome in  
11 217 patients with acute respiratory distress syndrome. *Crit Care Med*  
12 2002;30:2450–2456.

13  
14 38. Esteban A, Anzueto A, Frutos F, *et al.* Characteristics and outcomes in adult patients  
15 receiving mechanical ventilation. *JAMA* 2002;287:345-355.

16  
17 39. Gattinoni L, Bombino M, Pelosi P, *et al.* Lung structure and function in different  
18 stages of severe adult respiratory distress syndrome. *JAMA* 1994;271:1772–1779.

19  
20 40. Meduri GU. Clinical review: a paradigm shift: the bidirectional effect of  
21 inflammation on bacterial growth. Clinical implications for patients with acute  
22 respiratory distress syndrome. *Critical Care* 2002;6:24-29.

23  
24 41. Lamy M, Fallat RJ, Koeniger E, *et al.* Pathologic features and mechanisms of  
25 hypoxemia in adult respiratory distress syndrome. *Am Rev Respir Dis*  
26 1976;114:267-287.

27  
28 42. Sorbo LD and Slutsky AS. Acute respiratory distress syndrome and multiple organ  
29 failure. *Curr Opin Crit Care* 2011;17:1-6  
30  
31  
32  
33  
34  
35  
36  
37  
38  
39  
40  
41  
42  
43  
44  
45  
46  
47  
48  
49  
50  
51  
52  
53  
54  
55  
56  
57  
58  
59  
60

1  
2  
3  
4  
5  
6  
7  
8  
9  
10  
11  
12  
13  
14  
15  
16  
17  
18  
19  
20  
21  
22  
23  
24  
25  
26  
27  
28  
29  
30  
31  
32  
33  
34  
35  
36  
37  
38  
39  
40  
41  
42  
43  
44  
45  
46  
47  
48  
49  
50  
51  
52  
53  
54  
55  
56  
57  
58  
59  
60

**Patient confidentiality**

Details have been removed from this case description.

For peer review only
